# Supplementary material for: N-heterocyclic carbene-catalyzed enantioselective synthesis of spirocyclic ketones bearing gem-difluoromethylenes
Source: Royal Society of Chemistry journal article supplement (doi:10.1039/d3qo00503h), 2023-01-01
Supplement: d3qo00503h1.pdf [file d3qo00503h1.pdf]

# **N-Heterocyclic Carbene-Catalyzed Enantioselective Synthesis of Spirocyclic Ketones Bearing *gem*-Difluoromethylenes**

Zheng Liang, Jibin, Li, Chaolei Liu, Yiwei Zhu,\* Ding Du\*

<sup>a</sup> State Key Laboratory of Natural Medicines, School of Science, China Pharmaceutical University, Nanjing, 210009, P. R. China

<sup>b</sup>School of Chemistry and Environmental Engineering, Anhui Polytechnic University, Wuhu, Anhui 241000, P. R. China

Email: [yiwei.zhu@ahpu.edu.cn](mailto:yiwei.zhu@ahpu.edu.cn) (Y. Zhu); [ddmn9999@cpu.edu.cn](mailto:ddmn9999@cpu.edu.cn) (D. Du)

## *Table of the content*

|                                                                                        |            |
|----------------------------------------------------------------------------------------|------------|
| <b>1. General methods and materials .....</b>                                          | <b>S2</b>  |
| <b>2. General experimental procedure for the synthesis of racemic products 3 .....</b> | <b>S2</b>  |
| <b>3. General experimental procedure for the synthesis of products 3 .....</b>         | <b>S3</b>  |
| <b>4. Procedure for the scale-up synthesis of 3a .....</b>                             | <b>S3</b>  |
| <b>5. Procedure for the synthesis of product 6 .....</b>                               | <b>S3</b>  |
| <b>6. Study on the [4+2] annulation of vinyl enolate with ketone 2a .....</b>          | <b>S4</b>  |
| <b>7. Characterization of the products .....</b>                                       | <b>S6</b>  |
| <b>8. Copies of the NMR spectra .....</b>                                              | <b>S21</b> |
| <b>9. Copies of the HPLC spectra .....</b>                                             | <b>S75</b> |

## 1. General methods and materials

All reactions were carried out under an atmosphere of nitrogen in dry glassware, and were monitored by analytical thin-layer chromatography (TLC), which was visualized by ultraviolet light (254 nm). All solvents were obtained from commercial sources and were purified according to standard procedures. Purification of the products was accomplished by flash chromatography using silica gel (200~300 mesh). Substrates **1**<sup>1</sup> and **2**<sup>2</sup> were known compounds and were prepared according to known procedures. All NMR spectra were recorded on spectrometers, running at 300 MHz or 400 MHz for <sup>1</sup>H and 75 MHz or 100 MHz for <sup>13</sup>C respectively. Chemical shifts ( $\delta$ ) and coupling constants ( $J$ ) are reported in ppm and Hz respectively. The solvent signals were used as references (residual CHCl<sub>3</sub> in CDCl<sub>3</sub> :  $\delta_{\text{H}} = 7.26$  ppm,  $\delta_{\text{C}} = 77.0$  ppm). The following abbreviations are used to indicate the multiplicity in NMR spectra: s (singlet); d (doublet); t (triplet); q (quartet); m (multiplet). High resolution mass spectrometry (HRMS) was recorded on TOF perimer for ES<sup>+</sup>. The d.r. values were determined by <sup>1</sup>H NMR analysis of the crude products. The *e.r.* values were determined *via* chiral HPLC analysis.

## 2. General experimental procedure for the synthesis of racemic products **3**

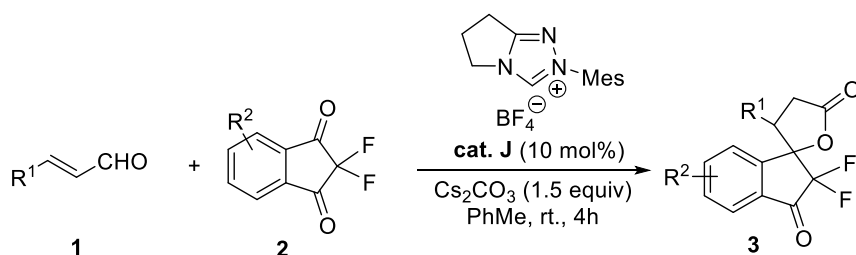

To an oven-dried 10 mL flask was charged with substrate **1** (0.2 mmol, 1.0 equiv.), substrate **2** (0.24 mmol, 1.2 equiv.),  $\text{Cs}_2\text{CO}_3$  (97.7 mg, 0.3 mmol, 1.5 equiv.), precatalyst **J** (6.3 mg, 0.02 mmol, 10 mol%). Then anhydrous PhMe (4 mL) was added to the flask. The resulting mixture was stirred under nitrogen atmosphere at rt typically for 4 h. After completion of the reaction as monitored by TLC, the reaction mixture was concentrated under reduced pressure. The residue was purified by chromatography on silica gel using

PE/EtOAc (8:1) as the eluent to afford racemic products **3**.

### 3. General experimental procedure for the synthesis of products **3**

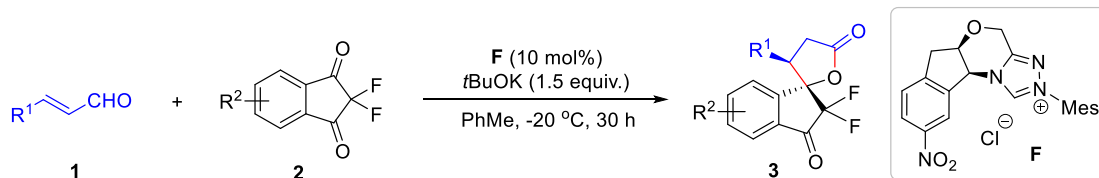

To an oven-dried 10 mL flask was charged with substrate **1** (0.2 mmol, 1.0 equiv.), substrate **2** (0.24 mmol, 1.2 equiv.), *t*BuOK (33.7 mg, 0.3 mmol, 1.5 equiv.), pre-catalyst **F** (8.2 mg, 0.02 mmol, 10 mol%). Then anhydrous PhMe (4 mL) was added to the flask. The resulting mixture was stirred under nitrogen atmosphere at -20°C (typically for 30 h). After completion of the reaction as monitored by TLC, the reaction mixture was concentrated under reduced pressure. The residue was purified by chromatography on silica gel using PE/EtOAc (8:1) as the eluent to afford products **3**.

### 4. Procedure for the scale-up Synthesis of **3a**

To an oven-dried 50 mL bottle was charged with substrate **1a** (1.0 mmol, 1.0 equiv.), substrate **2a** (1.2 mmol, 1.2 equiv.), *t*BuOK (1.5 mmol, 1.5 equiv.), pre-catalyst **F** (41.3 mg, 0.1 mmol, 10 mol%). Then anhydrous PhMe (20 mL) was added to the flask. The resulting mixture was stirred under nitrogen atmosphere at -20°C for 5 days. After completion of the reaction as monitored by TLC, the reaction mixture was concentrated under reduced pressure. The residue was purified by chromatography on silica gel using PE/EtOAc (8:1) as the eluent to afford product **3a** (226.7mg, 65%, 98:2 er, >20:1 dr).

### 5. Procedure for the synthesis of product **6**

Compound **3a** (0.1 mmol), NaOH (0.1 mmol), H<sub>2</sub>O/MeOH (10%, 2 mL) were charged in a 10 mL round bottom flask. Then, the reaction mixture was stirred at room temperature for 3 h. After the reaction was completed as detected by TLC, the PH of the reaction mixture was adjusted to 5 with 1M HCl, and the mixture was extracted with EtOAc. The combined organic layer was washed with brine, dried over anhydrous sodium sulfate, filtered, and concentrated in vacuo. The crude product was purified by

recrystallization to afford the product **6** as a white solid (33.0 mg, 90%, 97:3 er).

## 6. Study on the [4+2] annulation of vinyl enolate with ketone **2a**

### Procedure for the synthesis of product **8**

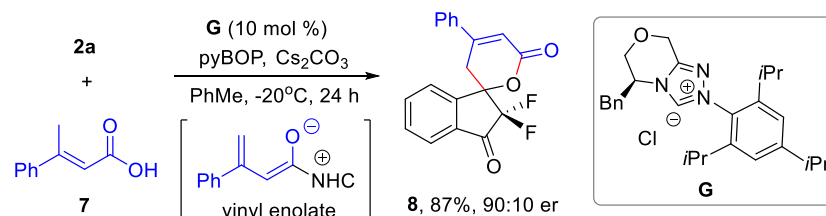

To an oven-dried 10 mL flask was charged with substrate **7** (0.1 mmol, 1.0 equiv.), substrate **2a** (0.12 mmol, 1.2 equiv.), Cs<sub>2</sub>CO<sub>3</sub> (97.7 mg, 0.3 mmol, 3.0 equiv.), pyBOP (78 mg, 0.15 mmol, 1.5 equiv.), precatalyst **G** (8.2 mg, 0.02 mmol, 10 mol%). Then anhydrous PhMe (4 mL) was added to the flask. The resulting mixture was stirred under nitrogen atmosphere at -20°C for 24h. After completion of the reaction as monitored by TLC, the reaction mixture was concentrated under reduced pressure. The residue was purified by chromatography on silica gel using PE/EtOAc (5:1) as the eluent to afford product **8** as a white solid (56.8 mg, 87% yield, 90:10 er).

**Table S1** Reaction condition optimization for the synthesis of **8** using acid **7** as the precursor

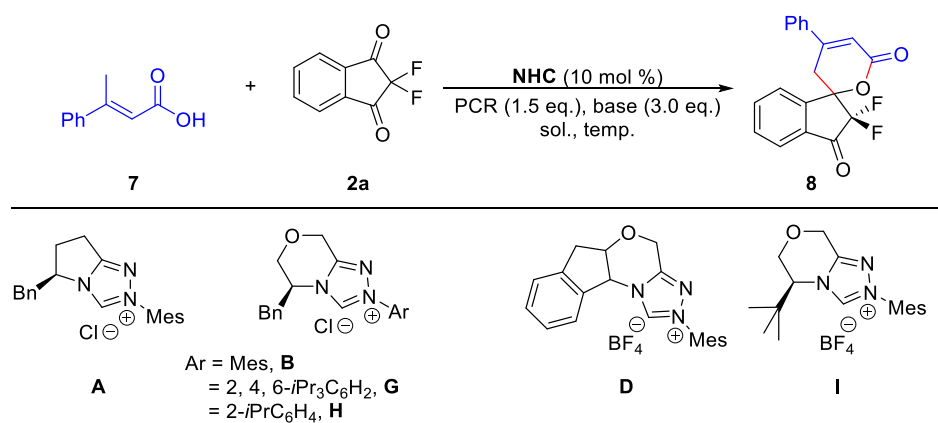

| entry | NHC      | PCR   | base                            | sol. | temp. | yield (%) | er           |
|-------|----------|-------|---------------------------------|------|-------|-----------|--------------|
| 1     | <b>A</b> | pyBOP | Cs <sub>2</sub> CO <sub>3</sub> | PhMe | rt    | 85        | 50:50 er     |
| 2     | <b>B</b> | pyBOP | Cs <sub>2</sub> CO <sub>3</sub> | PhMe | rt    | 89        | 72.5:27.5 er |
| 3     | <b>D</b> | pyBOP | Cs <sub>2</sub> CO <sub>3</sub> | PhMe | rt    | 90        | 50:50 er     |
| 4     | <b>G</b> | pyBOP | Cs <sub>2</sub> CO <sub>3</sub> | PhMe | rt    | 91        | 84.5:15.5 er |
| 5     | <b>H</b> | pyBOP | Cs <sub>2</sub> CO <sub>3</sub> | PhMe | rt    | 92        | 67:33 er     |
| 6     | <b>I</b> | pyBOP | Cs <sub>2</sub> CO <sub>3</sub> | PhMe | rt    | 75        | 62.5:37.5 er |
| 7     | <b>G</b> | pyBOP | DABCO                           | PhMe | rt    | 80        | 67.5:32.5 er |

|    |          |       |                                 |                    |       |    |          |
|----|----------|-------|---------------------------------|--------------------|-------|----|----------|
| 8  | <b>G</b> | pyBOP | CsOAc                           | PhMe               | rt    | 73 | 65:35 er |
| 9  | <b>G</b> | pyBOP | K <sub>2</sub> CO <sub>3</sub>  | PhMe               | rt    | 75 | 72:28 er |
| 10 | <b>G</b> | pyBOP | K <sub>2</sub> HPO <sub>4</sub> | PhMe               | rt    | 65 | 70:30 er |
| 11 | <b>G</b> | pyBOP | Cs <sub>2</sub> CO <sub>3</sub> | DCM                | rt    | 67 | 70:30 er |
| 12 | <b>G</b> | pyBOP | Cs <sub>2</sub> CO <sub>3</sub> | CH <sub>3</sub> CN | rt    | 52 | 50:50 er |
| 13 | <b>G</b> | pyBOP | Cs <sub>2</sub> CO <sub>3</sub> | THF                | rt    | 77 | 78:22 er |
| 14 | <b>G</b> | pyBOP | Cs <sub>2</sub> CO <sub>3</sub> | 1,4-dioxane        | rt    | 79 | 75:25 er |
| 15 | <b>G</b> | HBTU  | Cs <sub>2</sub> CO <sub>3</sub> | PhMe               | rt    | 85 | 83:17 er |
| 16 | <b>G</b> | pyBOP | Cs <sub>2</sub> CO <sub>3</sub> | PhMe               | 0°C   | 88 | 86:14 er |
| 17 | <b>G</b> | pyBOP | Cs <sub>2</sub> CO <sub>3</sub> | PhMe               | -20°C | 87 | 90:10 er |

Reaction Conditions: all reactions were performed in a 10 mL flask on a 0.1 mmol scale with 1.0 equiv of **2a**, 1.2 equiv of **7**, 10 mol% of an NHC precursor, 1.5 equiv. of PCR, 3.0 equiv. of a base in an anhydrous solvent (4 mL) at temp. under N<sub>2</sub>.

**Table S2.** Reaction condition optimization for the synthesis of **8** using enal **9** as the precursor

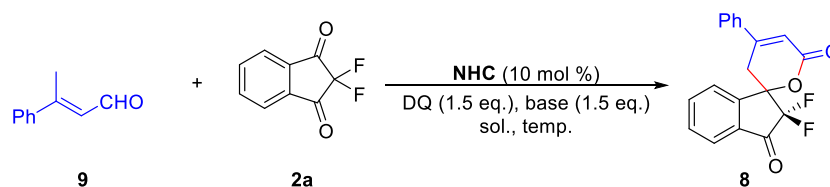

| entry | NHC      | base                            | sol. | temp. | yield (%) | er       |
|-------|----------|---------------------------------|------|-------|-----------|----------|
| 1     | <b>A</b> | Cs <sub>2</sub> CO <sub>3</sub> | PhMe | rt    | 77        | 50:50 er |
| 2     | <b>B</b> | Cs <sub>2</sub> CO <sub>3</sub> | PhMe | rt    | 85        | 79:21 er |
| 3     | <b>D</b> | Cs <sub>2</sub> CO <sub>3</sub> | PhMe | rt    | 80        | 50:50 er |
| 4     | <b>G</b> | Cs <sub>2</sub> CO <sub>3</sub> | PhMe | rt    | 87        | 85:15 er |
| 5     | <b>H</b> | Cs <sub>2</sub> CO <sub>3</sub> | PhMe | rt    | 89        | 76:24 er |
| 6     | <b>I</b> | Cs <sub>2</sub> CO <sub>3</sub> | PhMe | rt    | 82        | 85:15 er |

Reaction Conditions: all reactions were performed in a 10 mL flask on a 0.1 mmol scale with 1.0 equiv of **2a**, 1.2 equiv of **9**, 10 mol% of an NHC precursor, 1.5 equiv. of DQ, 1.5 equiv. of Cs<sub>2</sub>CO<sub>3</sub> in anhydrous PhMe (2 mL) at temp. under N<sub>2</sub>.

**Table S3.** Reaction condition optimization for the synthesis of **8** using 2-bromoenal **10** as the precursor

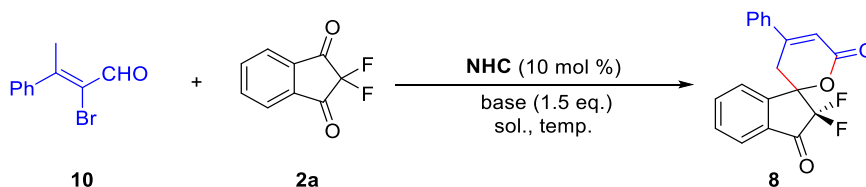

| entry | NHC      | base                            | sol. | temp. | yield (%) | er       |
|-------|----------|---------------------------------|------|-------|-----------|----------|
| 1     | <b>A</b> | Cs <sub>2</sub> CO <sub>3</sub> | PhMe | rt    | 81        | 50:50 er |
| 2     | <b>B</b> | Cs <sub>2</sub> CO <sub>3</sub> | PhMe | rt    | 76        | 77:23 er |
| 3     | <b>D</b> | Cs <sub>2</sub> CO <sub>3</sub> | PhMe | rt    | 84        | 50:50 er |
| 4     | <b>G</b> | Cs <sub>2</sub> CO <sub>3</sub> | PhMe | rt    | 85        | 83:27 er |

Reaction Conditions: all reactions were performed in a 10 mL flask on a 0.1 mmol scale with 1.0 equiv of **2a**, 1.2 equiv of **10**, 10 mol% of an NHC precursor, 1.5 equiv. of Cs<sub>2</sub>CO<sub>3</sub> in anhydrous PhMe (2 mL) at temp. under N<sub>2</sub>.

## 7. Characterization of the products

### (2*S*,3*R*)-3-(4-chlorophenyl)-2',2'-difluoro-3,4-dihydro-5H-spiro[furan-2,1'-

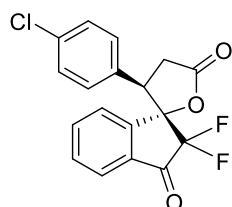

**indene]-3',5(2'H)-dione (3a).** White solid, MP: 160-162 °C; 58.6 mg, 84% yield, 96:4 er, >20:1 dr.  $[\alpha]_D^{23} = +7.444$  (C = 0.403 in CHCl<sub>3</sub>). HPLC DAICEL CHIRALCEL IC, n-hexane/2-propanol

= 80/20, flow rate = 1.0 mL/min,  $\lambda = 254$  nm, retention time: 12.41 min (major), 14.95 min (minor). <sup>1</sup>H NMR (300 MHz, Chloroform-*d*)  $\delta$  8.05-7.96 (m, 1H), 7.95-7.81 (m, 2H), 7.80-7.69 (m, 1H), 7.13 (d, *J* = 8.5 Hz, 2H), 6.56-6.52 (m, 2H), 4.05 (ddd, *J* = 12.8, 7.6, 4.2 Hz, 1H), 3.51 (ddd, *J* = 16.5, 13.9, 2.3 Hz, 1H), 2.99 (ddd, *J* = 17.0, 7.6, 1.7 Hz, 1H). <sup>13</sup>C NMR (101 MHz, Chloroform-*d*)  $\delta$  185.3 (dd, <sup>2</sup>*J*<sub>C-F</sub> = 25.6, 23.3 Hz), 172.72, 146.4 (d, <sup>4</sup>*J*<sub>C-F</sub> = 4.1 Hz), 138.31, 134.89, 133.4 (dd, <sup>4</sup>*J*<sub>C-F</sub> = 4.5, 2.3 Hz), 132.07, 129.7 (d, <sup>4</sup>*J*<sub>C-F</sub> = 3.3 Hz), 128.94, 128.7 (d, <sup>4</sup>*J*<sub>C-F</sub> = 1.8 Hz), 124.74, 124.7 (d, <sup>4</sup>*J*<sub>C-F</sub> = 1.9 Hz), 115.6 (dd, <sup>1</sup>*J*<sub>C-F</sub> = 273.5, 261.6 Hz), 86.5 (dd, <sup>2</sup>*J*<sub>C-F</sub> = 21.4, 16.9 Hz), 52.02, 31.9 (d, <sup>4</sup>*J*<sub>C-F</sub> = 2.8 Hz). <sup>19</sup>F NMR (376 MHz, Chloroform-*d*)  $\delta$  -109.0 (d, *J* = 270.7 Hz), -128.9 (d, *J* = 270.7 Hz). HRMS (ESI) calcd for C<sub>18</sub>H<sub>12</sub>ClF<sub>2</sub>O<sub>3</sub> (M+H)<sup>+</sup>: 349.0438, found 349.0422.

### (2*S*,3*R*)-2',2'-difluoro-3-phenyl-3,4-dihydro-5H-spiro[furan-2,1'-indene]-3',5(2'H)-

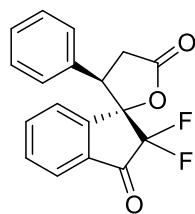

**dione (3b).** White solid, MP: 133-135 °C; 52.2 mg, 83% yield, 96:4 er, >20:1 dr.  $[\alpha]_D^{23} = +31.884$  (C = 0.276 in CHCl<sub>3</sub>). HPLC DAICEL CHIRALCEL IC, n-hexane/2-propanol = 80/20, flow rate = 1.0 mL/min,  $\lambda = 254$  nm, retention time: 12.79 min (major), 15.48 min

(minor). <sup>1</sup>H NMR (400 MHz, Chloroform-*d*)  $\delta$  8.00 (t, *J* = 7.5 Hz, 1H), 7.92 (d, *J* = 7.8 Hz, 1H), 7.82 (d, *J* = 7.7 Hz, 1H), 7.73 (t, *J* = 7.5 Hz, 1H), 7.23 (t, *J* = 7.4 Hz, 1H), 7.15 (t, *J* = 7.5 Hz, 2H), 6.60 (d, *J* = 7.7 Hz, 2H), 4.08 (ddd, *J* = 12.9, 7.6, 4.3 Hz, 1H), 3.57

(ddd,  $J = 16.5, 13.9, 2.3$  Hz, 1H), 2.99 (ddd,  $J = 17.1, 7.6, 1.7$  Hz, 1H).  $^{13}\text{C}$  NMR (101 MHz, Chloroform-*d*)  $\delta$  185.4 (dd,  $^2J_{\text{C-F}} = 25.5, 23.3$  Hz), 173.2, 146.7 (d,  $^3J_{\text{C-F}} = 8.0$  Hz), 138.1, 133.5 (dd,  $^4J_{\text{C-F}} = 4.7, 2.1$  Hz), 131.9, 130.0 (d,  $^4J_{\text{C-F}} = 1.6$  Hz), 128.8, 128.6, 128.5 (d,  $^4J_{\text{C-F}} = 3.1$  Hz), 124.7 (d,  $^4J_{\text{C-F}} = 1.4$  Hz), 124.5, 115.8 (dd,  $^1J_{\text{C-F}} = 274.3, 260.3$  Hz), 86.9 (dd,  $^2J_{\text{C-F}} = 21.3, 16.8$  Hz), 52.6, 31.8 (d,  $^4J_{\text{C-F}} = 2.9$  Hz).  $^{19}\text{F}$  NMR (376 MHz, Chloroform-*d*)  $\delta$  -109.0 (d,  $J = 264.24$  Hz), -129.4 (d,  $J = 270.70$  Hz). HRMS (ESI) calcd for  $\text{C}_{18}\text{H}_{13}\text{F}_2\text{O}_3$  (M+H) $^+$ : 315.0828, found 315.0837.

**(2*S*,3*R*)-2',2'-difluoro-3-(4-fluorophenyl)-3,4-dihydro-5*H*-spiro[furan-2,1'-**

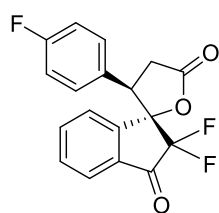

**indene]-3',5(2'H)-dione (3c).** White solid, MP: 158-159 °C; 43.2 mg, 65% yield, 98:2 er, >20:1 dr.  $[\alpha]_{\text{D}}^{23} = -39.140$  (C = 0.155 in  $\text{CHCl}_3$ ). HPLC DAICEL CHIRALCEL IC, n-hexane/2-propanol = 80/20, flow rate = 1.0 mL/min,  $\lambda = 254$  nm, retention time: 11.93

min (major), 14.19 min (minor).  $^1\text{H}$  NMR (400 MHz, Chloroform-*d*)  $\delta$  8.00 (t,  $J = 7.5$  Hz, 1H), 7.91 (d,  $J = 7.8$  Hz, 1H), 7.82 (d,  $J = 7.7$  Hz, 1H), 7.73 (t,  $J = 7.5$  Hz, 1H), 6.84 (t,  $J = 8.4$  Hz, 2H), 6.60-6.56 (m, 2H), 4.05 (ddd,  $J = 12.9, 7.6, 4.3$  Hz, 1H), 3.51 (ddd,  $J = 16.6, 13.9, 2.3$  Hz, 1H), 3.05-2.92 (m, 1H).  $^{13}\text{C}$  NMR (101 MHz, Chloroform-*d*)  $\delta$  185.3 (dd,  $^2J_{\text{C-F}} = 25.3, 23.3$  Hz), 172.9, 162.7 (d,  $^1J_{\text{C-F}} = 250.1$  Hz), 146.4 (d,  $^3J_{\text{C-F}} = 8.0$  Hz), 138.3, 133.4 (dd,  $^4J_{\text{C-F}} = 4.6, 2.2$  Hz), 132.0, 130.2 (dd,  $^3J_{\text{C-F}} = 8.3, 3.3$  Hz), 125.8, 124.7 (d,  $^4J_{\text{C-F}} = 1.4$  Hz), 124.6, 115.74 (dd,  $^1J_{\text{C-F}} = 273.9, 260.6$  Hz), 115.73 (d,  $^2J_{\text{C-F}} = 21.7$  Hz), 86.7 (dd,  $^2J_{\text{C-F}} = 21.2, 16.9$  Hz), 52.0, 31.0 (d,  $^4J_{\text{C-F}} = 2.9$  Hz).  $^{19}\text{F}$  NMR (376 MHz, Chloroform-*d*)  $\delta$  -109.1 (d,  $J = 270.7$  Hz), -112.23, -129.5 (d,  $J = 270.7$  Hz). HRMS (ESI) calcd for  $\text{C}_{19}\text{H}_{15}\text{F}_2\text{O}_4$ : 345.0933, found 345.0934. HRMS (ESI) calcd for  $\text{C}_{18}\text{H}_{12}\text{F}_3\text{O}_3$  (M+H) $^+$ : 333.0734, found 333.0737.

**(2*S*,3*R*)-3-(4-bromophenyl)-2',2'-difluoro-3,4-dihydro-5*H*-spiro[furan-2,1'-indene]-**

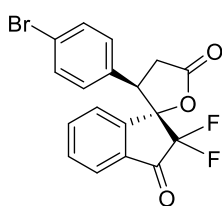

**3',5(2'H)-dione (3d).** White solid, MP: 180-181 °C; 48.0 mg, 61% yield, 97:3 er, >20:1 dr.  $[\alpha]_{\text{D}}^{23} = -39.140$  (C = 0.155 in  $\text{CHCl}_3$ ). HPLC DAICEL CHIRALCEL IC, n-hexane/2-propanol = 80/20, flow rate = 1.0 mL/min,  $\lambda = 254$  nm, retention time: 13.68 min

(major), 16.06 min (minor).  $^1\text{H}$  NMR (400 MHz, Chloroform-*d*)  $\delta$  8.01 (t,  $J = 7.5$  Hz,

1H), 7.92 (d,  $J = 7.8$  Hz, 1H), 7.85 (d,  $J = 7.7$  Hz, 1H), 7.75 (t,  $J = 7.5$  Hz, 1H), 7.28 (d,  $J = 8.4$  Hz, 2H), 6.50-6.47 (m, 2H), 4.05 (ddd,  $J = 12.7, 7.5, 4.2$  Hz, 1H), 3.51 (ddd,  $J = 16.4, 13.8, 2.2$  Hz, 1H), 3.00 (ddd,  $J = 17.0, 7.6, 1.6$  Hz, 1H).  $^{13}\text{C}$  NMR (101 MHz, Chloroform-*d*)  $\delta$  185.4 (dd,  $^2J_{\text{C-F}} = 25.4, 23.3$  Hz), 172.7, 146.4 (d,  $^3J_{\text{C-F}} = 7.9$  Hz), 138.3, 133.4 (dd,  $^4J_{\text{C-F}} = 4.6, 1.7$  Hz), 132.1, 131.9, 130.0 (d,  $^4J_{\text{C-F}} = 3.3$  Hz), 129.3 (d,  $^4J_{\text{C-F}} = 1.9$  Hz), 124.74, 124.70, 123.0, 115.6 (dd,  $^1J_{\text{C-F}} = 273.7, 261.6$  Hz), 86.4 (dd,  $^2J_{\text{C-F}} = 21.3, 16.8$  Hz), 52.0, 31.9 (d,  $^4J_{\text{C-F}} = 2.8$  Hz).  $^{19}\text{F}$  NMR (376 MHz, Chloroform-*d*)  $\delta$  -109.0 (d,  $J = 270.7$  Hz), -128.7 (d,  $J = 274.5$  Hz). HRMS (ESI) calcd for  $\text{C}_{18}\text{H}_{12}\text{BrF}_2\text{O}_3$  (M+H) $^+$ : 392.9933, 394.9912, found 392.39930, 394.9903.

**(2*S*,3*R*)-2',2'-difluoro-3-(*p*-tolyl)-3,4-dihydro-5H-spiro[furan-2,1'-indene]-**

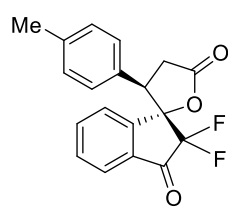

**3',5(2'H)-dione (3e).** White solid, MP: 170-172 °C; 48.0 mg, 75% yield, 98:2 er, >20:1 dr.  $[\alpha]_{\text{D}}^{23} = -9.524$  ( $C = 0.154$  in  $\text{CHCl}_3$ ). HPLC DAICEL CHIRALCEL IC, n-hexane/2-propanol = 85/15, flow rate = 1.0 mL/min,  $\lambda = 254$  nm, retention time: 16.57 min

(major), 19.84 min (minor).  $^1\text{H}$  NMR (400 MHz, Chloroform-*d*)  $\delta$  7.98 (t,  $J = 7.5$  Hz, 1H), 7.91 (d,  $J = 7.7$  Hz, 1H), 7.81 (d,  $J = 7.7$  Hz, 1H), 7.72 (t,  $J = 7.5$  Hz, 1H), 6.94 (d,  $J = 7.8$  Hz, 2H), 6.48 (d,  $J = 5.8$  Hz, 2H), 4.03 (ddd,  $J = 13.0, 7.5, 4.3$  Hz, 1H), 3.54 (ddd,  $J = 16.7, 14.0, 2.4$  Hz, 1H), 2.96 (ddd,  $J = 17.0, 7.5, 1.7$  Hz, 1H), 2.25 (s, 3H).  $^{13}\text{C}$  NMR (101 MHz, Chloroform-*d*)  $\delta$  185.4 (dd,  $^2J_{\text{C-F}} = 25.2, 23.3$  Hz), 173.4, 146.8 (d,  $^3J_{\text{C-F}} = 8.0$  Hz), 138.7, 138.1, 133.5 (dd,  $^4J_{\text{C-F}} = 4.7, 2.1$  Hz), 131.8, 129.4, 128.3 (d,  $^4J_{\text{C-F}} = 3.1$  Hz), 126.7 (d,  $^4J_{\text{C-F}} = 1.8$  Hz), 124.7 (d,  $^4J_{\text{C-F}} = 1.2$  Hz), 124.5, 115.8 (dd,  $^1J_{\text{C-F}} = 274.7, 259.8$  Hz), 86.8 (dd,  $^2J_{\text{C-F}} = 21.2, 16.7$  Hz), 52.5, 31.9 (d,  $^4J_{\text{C-F}} = 2.9$  Hz), 21.2.  $^{19}\text{F}$  NMR (376 MHz, Chloroform-*d*)  $\delta$  -108.9 (d,  $J = 270.7$  Hz), -129.8 (d,  $J = 270.7$  Hz). HRMS (ESI) calcd for  $\text{C}_{19}\text{H}_{14}\text{F}_2\text{NaO}_3$  (M+Na) $^+$ : 351.0804, found 351.0812.

**(2*S*,3*R*)-2',2'-difluoro-3-(4-methoxyphenyl)-3,4-dihydro-5H-spiro[furan-2,1'-**

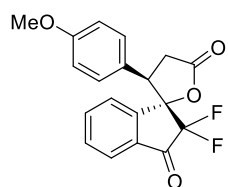

**indene]-3',5(2'H)-dione (3f).** White solid, MP: 191-192 °C; 58.5 mg, 85% yield, 95.5:4.5 er, >20:1 dr.  $[\alpha]_{\text{D}}^{23} = -0.683$  ( $C = 0.293$  in  $\text{CHCl}_3$ ). HPLC DAICEL CHIRALCEL IC, n-hexane/2-propanol = 85/15, flow rate = 1.0 mL/min,  $\lambda = 254$  nm, retention



time: 23.63 min (major), 29.44 min (minor). <sup>1</sup>H NMR (400 MHz, Chloroform-*d*) δ 7.98 (t, *J* = 7.6 Hz, 1H), 7.89 (d, *J* = 7.8 Hz, 1H), 7.81 (d, *J* = 7.7 Hz, 1H), 7.71 (t, *J* = 7.5 Hz, 1H), 6.66 (d, *J* = 8.8 Hz, 2H), 6.55-6.45 (m, 2H), 3.99 (ddd, *J* = 12.9, 7.6, 4.4 Hz, 1H), 3.72 (s, 3H), 3.51 (ddd, *J* = 16.8, 14.1, 2.4 Hz, 1H), 2.96 (ddd, *J* = 17.1, 7.6, 1.9 Hz, 1H). <sup>13</sup>C NMR (101 MHz, Chloroform-*d*) δ 185.3 (t, <sup>2</sup>*J*<sub>C-F</sub> = 23.2 Hz), 173.4, 159.8, 146.7 (d, <sup>3</sup>*J*<sub>C-F</sub> = 8.3 Hz), 138.1, 133.4 (d, <sup>4</sup>*J*<sub>C-F</sub> = 3.3 Hz), 129.7, 129.7, 124.6 (d, <sup>4</sup>*J*<sub>C-F</sub> = 1.7 Hz), 124.5, 121.4 (d, <sup>4</sup>*J*<sub>C-F</sub> = 1.7 Hz), 115.9 (dd, <sup>1</sup>*J*<sub>C-F</sub> = 274.7, 259.7 Hz), 114.0, 86.9 (dd, <sup>2</sup>*J*<sub>C-F</sub> = 25.6, 23.1 Hz), 55.3, 52.3, 32.0 (d, <sup>4</sup>*J*<sub>C-F</sub> = 3.1 Hz). <sup>19</sup>F NMR (376 MHz, Chloroform-*d*) δ -109.0 (d, *J* = 267.0Hz), -130.3 (d, *J* = 267.0Hz). HRMS (ESI) calcd for C<sub>19</sub>H<sub>15</sub>F<sub>2</sub>O<sub>4</sub> (M+H)<sup>+</sup>: 345.0933, found 345.0934.

**(2*S*,3*R*)-3-([1,1'-biphenyl]-4-yl)-2',2'-difluoro-3,4-dihydro-5*H*-spiro[furan-2,1'-**

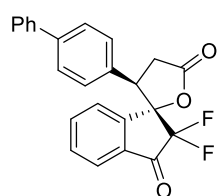

**indene]-3',5(2'H)-dione (3g).** White solid, MP: 188-189 °C; 54.7 mg, 70% yield, 97:3 er, >20:1 dr. [ $\alpha$ ]<sub>D</sub><sup>23</sup> = 62.319 (C = 0.391 in CHCl<sub>3</sub>). HPLC DAICEL CHIRALCEL IC, n-hexane/2-propanol = 80/20, flow rate = 1.0 mL/min,  $\lambda$  = 254 nm, retention time: 16.94

min (major), 22.31 min (minor). <sup>1</sup>H NMR (400 MHz, Chloroform-*d*) δ 8.00 (t, *J* = 7.5 Hz, 1H), 7.94 (d, *J* = 7.8 Hz, 1H), 7.84 (d, *J* = 7.7 Hz, 1H), 7.74 (t, *J* = 7.5 Hz, 1H), 7.50 (d, *J* = 7.5 Hz, 2H), 7.44-7.30 (m, 5H), 6.68 (dd, *J* = 8.3, 2.3 Hz, 2H), 4.13 (ddd, *J* = 12.9, 7.6, 4.2 Hz, 1H), 3.60 (ddd, *J* = 16.6, 13.7, 2.2 Hz, 1H), 3.02 (dd, *J* = 17.0, 7.5 Hz, 1H). <sup>13</sup>C NMR (101 MHz, Chloroform-*d*) δ 185.4 (dd, <sup>2</sup>*J*<sub>C-F</sub> = 25.4, 23.1 Hz), 173.2, 146.7 (d, <sup>3</sup>*J*<sub>C-F</sub> = 7.9 Hz), 141.5, 140.0, 138.2, 133.5 (dd, <sup>4</sup>*J*<sub>C-F</sub> = 4.4, 1.8 Hz), 131.9, 128.9 (d, <sup>4</sup>*J*<sub>C-F</sub> = 1.9 Hz), 128.9, 128.8 (d, <sup>4</sup>*J*<sub>C-F</sub> = 3.1 Hz), 127.8, 127.2, 127.1, 124.7 (d, <sup>4</sup>*J*<sub>C-F</sub> = 1.6 Hz), 124.6, 115.8 (dd, <sup>1</sup>*J*<sub>C-F</sub> = 274.0, 260.6 Hz), 86.8 (dd, <sup>2</sup>*J*<sub>C-F</sub> = 21.3, 16.8 Hz), 52.3, 31.9 (d, <sup>4</sup>*J*<sub>C-F</sub> = 2.8 Hz). <sup>19</sup>F NMR (376 MHz, Chloroform-*d*) δ -109.0 (d, *J* = 270.7Hz), -129.0 (d, *J* = 270.7Hz). HRMS (ESI) calcd for C<sub>19</sub>H<sub>14</sub>F<sub>2</sub>NaO<sub>3</sub> (M+Na)<sup>+</sup>: 391.1140, found 391.1134.

**(2*S*,3*R*)-2',2'-difluoro-3-(4-(trifluoromethyl)phenyl)-3,4-dihydro-5*H*-spiro[furan-2,1'-indene]-3',5(2'H)-dione (3h).** White solid, MP: 180-181 °C; 50.5 mg, 66% yield,

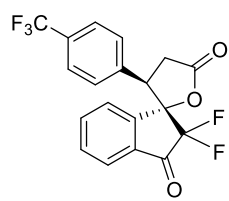

94:6 er, >20:1 dr.  $[\alpha]_D^{23} = -4.444$  ( $C = 0.240$  in  $\text{CHCl}_3$ ). HPLC DAICEL CHIRALCEL IC, n-hexane/2-propanol = 95/5, flow rate = 1.0 mL/min,  $\lambda = 254$  nm, retention time: 31.92 min (major), 37.19 min (minor).  $^1\text{H NMR}$  (300 MHz, Chloroform-*d*)  $\delta$  8.03 (t,  $J = 7.5$  Hz, 1H), 7.95 (d,  $J = 7.8$  Hz, 1H), 7.86 (d,  $J = 7.7$  Hz, 1H), 7.77 (t,  $J = 7.4$  Hz, 1H), 7.42 (d,  $J = 8.0$  Hz, 2H), 6.76 (d,  $J = 8.0$  Hz, 2H), 4.17 (ddd,  $J = 12.8, 7.5, 4.0$  Hz, 1H), 3.57 (ddd,  $J = 16.2, 13.6, 2.1$  Hz, 1H), 3.05 (dd,  $J = 17.0, 7.6$  Hz, 1H).  $^{13}\text{C NMR}$  (101 MHz, Chloroform-*d*)  $\delta$  185.4 (t,  $^2J_{\text{C-F}} = 23.5$  Hz), 172.4, 146.3 (d,  $^3J_{\text{C-F}} = 7.9$  Hz), 138.5, 134.7, 133.4 (dd,  $^4J_{\text{C-F}} = 4.5, 2.7$  Hz), 132.3, 131.0 (q,  $^1J_{\text{C-F}} = 32.5$  Hz), 128.8 (d,  $^4J_{\text{C-F}} = 3.2$  Hz), 125.6 (q,  $^3J_{\text{C-F}} = 3.7$  Hz), 123.7 (q,  $^1J_{\text{C-F}} = 272.5$  Hz), 124.9, 124.8, 115.5 (dd,  $^1J_{\text{C-F}} = 272.8, 262.7$  Hz), 86.4 (dd,  $^2J_{\text{C-F}} = 21.8, 17.2$  Hz), 52.0, 31.9 (d,  $^4J_{\text{C-F}} = 2.6$  Hz).  $^{19}\text{F NMR}$  (282 MHz, Chloroform-*d*)  $\delta$  -62.84, -109.2 (d,  $J = 272.8$  Hz), -127.7 (d,  $J = 272.8$  Hz). HRMS (ESI) calcd for  $\text{C}_{19}\text{H}_{11}\text{F}_5\text{KO}_3$  ( $\text{M}+\text{K}$ ) $^+$ : 421.0260, found 421.0630.

**(2*S*,3*R*)-2',2'-difluoro-3-(4-nitrophenyl)-3,4-dihydro-5*H*-spiro[furan-2,1'-indene]-**

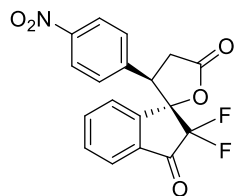

**3',5(2'*H*)-dione (3i).** Yellow solid, MP: 175-177 °C; 39.5 mg, 55% yield, 95:5 er, >20:1 dr.  $[\alpha]_D^{23} = 15.385$  ( $C = 0.013$  in  $\text{CHCl}_3$ ). HPLC DAICEL CHIRALCEL IC, n-hexane/2-propanol = 70/30, flow rate = 1.0 mL/min,  $\lambda = 254$  nm, retention time: 15.27 min (major), 19.06 min (minor).  $^1\text{H NMR}$  (300 MHz, DMSO-*d*<sub>6</sub>)  $\delta$  8.33 (d,  $J = 7.8$  Hz, 1H), 8.28-8.20 (m, 1H), 8.05 (d,  $J = 8.4$  Hz, 2H), 7.93 (q,  $J = 8.2, 7.6$  Hz, 2H), 7.01 (d,  $J = 6.9$  Hz, 2H), 4.75 (ddd,  $J = 12.7, 7.7, 3.8$  Hz, 1H), 3.88-3.70 (m, 1H), 3.16 (dd,  $J = 17.4, 7.8$  Hz, 1H).  $^{13}\text{C NMR}$  (101 MHz, DMSO-*d*<sub>6</sub>)  $\delta$  186.3 (dd,  $^2J_{\text{C-F}} = 25.5, 23.7$  Hz), 173.52, 147.46, 146.7 (d,  $^3J_{\text{C-F}} = 7.2$  Hz), 140.11, 133.32, 132.40, 130.25, 130.22, 126.49, 125.09, 123.72, 115.8 (dd,  $^1J_{\text{C-F}} = 272.0, 259.7$  Hz), 86.0 (dd,  $^2J_{\text{C-F}} = 20.9, 15.0$  Hz), 49.96, 31.86.  $^{19}\text{F NMR}$  (282 MHz, DMSO-*d*<sub>6</sub>)  $\delta$  -109.6 (d,  $J = 270.3$  Hz), -125.9 (d,  $J = 270.2$  Hz). HRMS (ESI) calcd for  $\text{C}_{18}\text{H}_{11}\text{F}_2\text{KNO}_5$  ( $\text{M}+\text{K}$ ) $^+$ : 398.0237, found 398.0219.

**4-((2*S*,3*R*)-2',2'-difluoro-3',5-dioxo-2',3',4,5-tetrahydro-3*H*-spiro[furan-2,1'-**

**inden]-3-yl)benzotrile (3j).** White solid, MP: 150-152 °C; 40.7 mg, 60% yield, 95:5

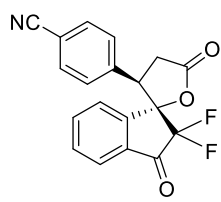

er, 5:1 dr.  $[\alpha]_D^{23} = 49.083$  ( $C = 0.218$  in  $\text{CHCl}_3$ ). HPLC DAICEL CHIRALCEL IC, n-hexane/Ethanol = 70/30, flow rate = 1.0 mL/min,  $\lambda = 254$  nm, retention time: for major diastereomer: 17.41 min (major), 20.78 min (minor); for minor diastereomer: 29.21 min (major), 33.92 min (minor).  $^1\text{H}$  NMR (400 MHz, Chloroform-*d*)  $\delta$  8.03 (t,  $J = 7.6$  Hz, 1H), 7.94 (d,  $J = 7.8$  Hz, 1H), 7.86 (d,  $J = 7.7$  Hz, 1H), 7.78 (t,  $J = 7.5$  Hz, 1H), 7.45 (d,  $J = 8.2$  Hz, 2H), 6.77-6.74 (m, 2H), 4.17 (ddd,  $J = 12.5, 7.6, 3.9$  Hz, 1H), 3.54 (ddd,  $J = 16.0, 13.6, 2.1$  Hz, 1H), 3.05 (ddd,  $J = 17.0, 7.6, 1.5$  Hz, 1H).  $^{13}\text{C}$  NMR (101 MHz, Chloroform-*d*)  $\delta$  185.3 (dd,  $^2J_{\text{C-F}} = 25.3, 23.8$  Hz), 172.1, 146.1 (d,  $^3J_{\text{C-F}} = 7.5$  Hz), 138.6, 136.0, 133.3 (dd,  $^4J_{\text{C-F}} = 4.5, 2.8$  Hz), 132.42, 132.37, 129.1 (d,  $^4J_{\text{C-F}} = 3.3$  Hz), 124.9, 124.8, 118.0, 115.4 (dd,  $^1J_{\text{C-F}} = 272.3, 263.5$  Hz), 112.8, 86.30 (dd,  $^2J_{\text{C-F}} = 21.6, 17.1$  Hz), 52.0, 31.8 (d,  $^4J_{\text{C-F}} = 2.6$  Hz).  $^{19}\text{F}$  NMR (376 MHz, Chloroform-*d*)  $\delta$  -109.5 (d,  $J = 274.5$  Hz), -127.3 (d,  $J = 270.7$  Hz). HRMS (ESI) calcd for  $\text{C}_{19}\text{H}_{12}\text{F}_2\text{NO}_3(\text{M}+\text{H})^+$ : 340.0780, found 340.0784.

**(2*S*,3*R*)-2',2'-difluoro-3-(3-fluorophenyl)-3,4-dihydro-5*H*-spiro[furan-2,1'-indene]-**

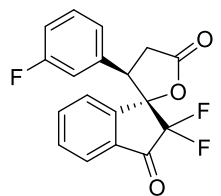

**3',5(2'*H*)-dione (3k).** White solid, MP: 117-119 °C; 49.8 mg, 75% yield, 99:1 er, >20:1 dr.  $[\alpha]_D^{23} = -15.569$  ( $C = 0.167$  in  $\text{CHCl}_3$ ). HPLC DAICEL CHIRALCEL IG, n-hexane/Ethanol = 90/10, flow rate = 1.0 mL/min,  $\lambda = 254$  nm, retention time: 20.16 min (major), 23.50 min (minor).  $^1\text{H}$  NMR (400 MHz, Chloroform-*d*)  $\delta$  8.01 (t,  $J = 7.5$  Hz, 1H), 7.92 (d,  $J = 7.8$  Hz, 1H), 7.85 (d,  $J = 7.7$  Hz, 1H), 7.75 (t,  $J = 7.5$  Hz, 1H), 7.15-7.09 (m, 1H), 6.95-6.90 (m, 1H), 6.46 - 6.26 (m, 2H), 4.10 (ddd,  $J = 12.7, 7.6, 4.1$  Hz, 1H), 3.51 (ddd,  $J = 16.4, 13.8, 2.2$  Hz, 1H), 3.09 - 2.94 (m, 1H).  $^{13}\text{C}$  NMR (101 MHz, Chloroform-*d*)  $\delta$  185.4 (dd,  $^2J_{\text{C-F}} = 25.3, 23.4$  Hz), 172.7, 162.51 (d,  $^1J_{\text{C-F}} = 248.5$  Hz), 146.4 (d,  $^3J_{\text{C-F}} = 7.9$  Hz), 138.3, 133.5 (dd,  $^4J_{\text{C-F}} = 4.5, 2.2$  Hz), 132.8 (dd,  $^3J_{\text{C-F}} = 7.5, 1.9$  Hz), 132.1, 130.3 (d,  $^3J_{\text{C-F}} = 8.4$  Hz), 124.7, 124.040 (d,  $^4J_{\text{C-F}} = 6.0$  Hz), 124.039, 115.8 (d,  $^2J_{\text{C-F}} = 21.1$  Hz), 115.5590 (dd,  $^1J_{\text{C-F}} = 279.2, 259.6$  Hz), 115.5589 (d,  $^2J_{\text{C-F}} = 25.8$  Hz), 86.5 (dd,  $^2J_{\text{C-F}} = 21.6, 16.9$  Hz), 52.0, 31.9 (d,  $^4J_{\text{C-F}} = 2.8$  Hz).  $^{19}\text{F}$  NMR (376 MHz,

Chloroform-*d*)  $\delta$  -109.1 (d,  $J = 270.7$ Hz), -111.57, -128.5 (d,  $J = 274.5$ Hz). HRMS (ESI) calcd for  $C_{18}H_{12}F_3O_3$  (M+H)<sup>+</sup>: 333.0734, found 333.0737.

**(2*S*,3*R*)-3-(3-chlorophenyl)-2',2'-difluoro-3,4-dihydro-5H-spiro[furan-2,1'-indene]-**

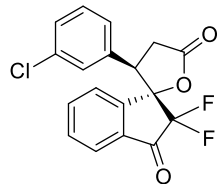

**3',5(2'H)-dione (3l).** White solid, MP: 155-156 °C; 53.0 mg, 76%

yield, 97:3 er, >20:1 dr.  $[\alpha]_D^{23} = -7.375$  (C = 0.348 in  $CHCl_3$ ).

HPLC DAICEL CHIRALCEL IC, n-hexane/2-propanol = 93/7,

flow rate = 1.0 mL/min,  $\lambda = 254$  nm, retention time: 30.16 min

(major), 37.24 min (minor). <sup>1</sup>H NMR (300 MHz, Chloroform-*d*)  $\delta$  8.04-7.99 (m, 1H),

7.95-7.79 (m, 2H), 7.80-7.70 (m, 1H), 7.20 (d,  $J = 8.3$  Hz, 1H), 7.09 (t,  $J = 7.9$  Hz, 1H),

6.65 - 6.40 (m, 2H), 4.06 (ddd,  $J = 12.6, 7.6, 4.1$  Hz, 1H), 3.51 (ddd,  $J = 16.4, 13.8, 2.2$

Hz, 1H), 3.00 (ddd,  $J = 17.0, 7.6, 1.6$  Hz, 1H). <sup>13</sup>C NMR (101 MHz, Chloroform-*d*)  $\delta$

185.4 (dd, <sup>2</sup> $J_{C-F} = 25.6, 23.9$  Hz), 172.6, 146.4 (d, <sup>3</sup> $J_{C-F} = 7.8$  Hz), 138.4, 134.6, 133.5

(dd, <sup>4</sup> $J_{C-F} = 4.4, 2.4$  Hz), 132.4 (d, <sup>4</sup> $J_{C-F} = 1.9$  Hz), 132.1, 129.9, 129.0, 128.7, 128.7,

126.4 (d, <sup>4</sup> $J_{C-F} = 3.2$  Hz), 124.7, 115.5 (dd, <sup>1</sup> $J_{C-F} = 273.5, 261.9$  Hz), 86.5 (dd, <sup>2</sup> $J_{C-F} =$

21.4, 16.8 Hz), 52.0, 31.8 (d, <sup>4</sup> $J_{C-F} = 2.7$ Hz). <sup>19</sup>F NMR (282 MHz, Chloroform-*d*)  $\delta$  -

109.1 (d,  $J = 271.8$  Hz), -128.6 (d,  $J = 271.8$  Hz). HRMS (ESI) calcd for  $C_{18}H_{12}ClF_2O_3$

(M+H)<sup>+</sup>: 349.0438, found 349.0442.

**(2*S*,3*R*)-3-(3-bromophenyl)-2',2'-difluoro-3,4-dihydro-5H-spiro[furan-2,1'-**

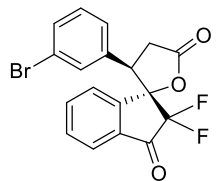

**indene]-3',5(2'H)-dione (3m).** White solid, MP: 172-174 °C; 49.5

mg, 63% yield, 97:3 er, 3.5:1 dr.  $[\alpha]_D^{23} = -7.375$  (C = 0.348 in

$CHCl_3$ ). HPLC DAICEL CHIRALCEL IC, n-hexane/2-propanol =

90/10, flow rate = 1.0 mL/min,  $\lambda = 254$  nm, retention time: for minor diastereomer:

14.90 min (minor), 18.62 min (major); for major diastereomer: 22.99 min (major),

28.82 min (minor). <sup>1</sup>H NMR (400 MHz, Chloroform-*d*)  $\delta$  8.01 (t,  $J = 7.5$  Hz, 1H), 7.97-

7.82 (m, 2H), 7.76 (t,  $J = 7.5$  Hz, 1H), 7.35 (d,  $J = 7.9$  Hz, 1H), 7.03 (t,  $J = 7.9$  Hz, 1H),

6.68 (s, 1H), 6.56 (d,  $J = 7.6$  Hz, 1H), 4.06 (ddd,  $J = 12.6, 7.5, 4.1$  Hz, 1H), 3.50 (ddd,

$J = 16.3, 13.7, 2.2$  Hz, 1H), 3.00 (ddd,  $J = 17.0, 7.6, 1.7$  Hz, 1H). <sup>13</sup>C NMR (101 MHz,

Chloroform-*d*)  $\delta$  185.3 (dd, <sup>2</sup> $J_{C-F} = 28.3, 23.3$  Hz), 172.6, 146.3 (d, <sup>3</sup> $J_{C-F} = 7.9$  Hz),

138.4, 133.5 (dd, <sup>4</sup> $J_{C-F} = 4.7, 2.5$  Hz), 132.6 (d, <sup>4</sup> $J_{C-F} = 1.9$  Hz), 132.1, 131.9, 131.6,

131.6, 130.1, 126.8 (d,  $^4J_{C-F} = 3.3$  Hz), 124.7, 122.6, 115.5 (dd,  $^1J_{C-F} = 273.6$ , 261.9 Hz), 86.5 (dd,  $^2J_{C-F} = 21.5$ , 17.0 Hz), 51.9, 31.7 (d,  $^4J_{C-F} = 2.8$  Hz).  $^{19}\text{F}$  NMR (376 MHz, Chloroform-*d*)  $\delta$  -109.2 (d,  $J = 270.7$ Hz), -128.6 (d,  $J = 270.7$ Hz). HRMS (ESI) calcd for  $\text{C}_{18}\text{H}_{12}\text{BrF}_2\text{O}_3$  ( $\text{M}+\text{H}$ ) $^+$ : 392.9933, 394.9912, found 392.39930, 394.9903.

**(2S,3R)-2',2'-difluoro-3-(3-methoxyphenyl)-3,4-dihydro-5H-spiro[furan-2,1'-**

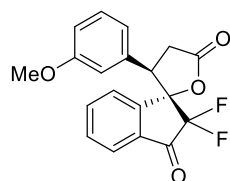

**indene]-3',5(2'H)-dione (3n).** White solid, MP: 130-132 °C; 53.0 mg, 77% yield, 98:2 er, >20:1 dr.  $[\alpha]_{\text{D}}^{23} = -11.463$  (C = 0.410 in  $\text{CHCl}_3$ ). HPLC DAICEL CHIRALCEL IC, n-hexane/2-propanol = 80/20, flow rate = 1.0 mL/min,  $\lambda = 254$  nm, retention time: 15.11

min (major), 17.98 min (minor)  $^1\text{H}$  NMR (400 MHz, Chloroform-*d*)  $\delta$  7.99 (t,  $J = 6.9$  Hz, 1H), 7.91 (d,  $J = 7.8$  Hz, 1H), 7.83 (d,  $J = 7.7$  Hz, 1H), 7.73 (t,  $J = 7.3$  Hz, 1H), 7.06 (t,  $J = 8.0$  Hz, 1H), 6.74 (dd,  $J = 8.2$ , 2.4 Hz, 1H), 6.20 (d,  $J = 7.6$  Hz, 1H), 6.08 (s, 1H), 4.06 (ddd,  $J = 12.8$ , 7.5, 4.3 Hz, 1H), 3.58 (s, 3H), 3.52 (ddd,  $J = 16.5$ , 13.9, 2.2 Hz, 1H), 2.98 (ddd,  $J = 17.0$ , 7.6, 1.6 Hz, 1H).  $^{13}\text{C}$  NMR (101 MHz, Chloroform-*d*)  $\delta$  185.5 (dd,  $^2J_{C-F} = 25.1$ , 23.3 Hz), 173.1, 159.5, 146.8 (d,  $^3J_{C-F} = 8.6$  Hz), 138.2, 133.6 (dd,  $^4J_{C-F} = 4.6$ , 2.3 Hz), 131.9, 131.6 (d,  $^4J_{C-F} = 1.8$  Hz), 129.7, 124.7 (d,  $^4J_{C-F} = 1.7$  Hz), 124.5, 120.5 (d,  $^4J_{C-F} = 3.2$  Hz), 115.7 (dd,  $^1J_{C-F} = 274.7$ , 260.3 Hz), 114.5 (d,  $^4J_{C-F} = 2.9$  Hz), 113.9, 86.7 (dd,  $^2J_{C-F} = 21.3$ , 16.8 Hz), 55.1, 52.3, 31.9 (d,  $^4J_{C-F} = 2.8$  Hz).  $^{19}\text{F}$  NMR (376 MHz, Chloroform-*d*)  $\delta$  -108.9 (d,  $J = 270.7$ Hz), -129.1 (d,  $J = 270.7$ Hz). HRMS (ESI) calcd for  $\text{C}_{19}\text{H}_{15}\text{F}_2\text{O}_4$  ( $\text{M}+\text{H}$ ) $^+$ : 345.0933, found 345.0934.

**(2S,3R)-2',2'-difluoro-3-(m-tolyl)-3,4-dihydro-5H-spiro[furan-2,1'-indene]-**

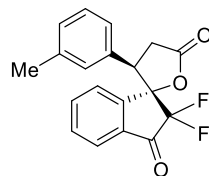

**3',5(2'H)-dione (3o).** White solid, MP: 128-130 °C; 38.7 mg, 59% yield, 96:4 er, >20:1 dr.  $[\alpha]_{\text{D}}^{23} = -32.873$  (C = 0.145 in  $\text{CHCl}_3$ ). HPLC DAICEL CHIRALCEL IC, n-hexane/2-propanol = 85/15,

flow rate = 1.0 mL/min,  $\lambda = 254$  nm, retention time: 14.46 min (major), 17.96 min (minor).  $^1\text{H}$  NMR (400 MHz, Chloroform-*d*)  $\delta$  7.98 (t,  $J = 7.5$  Hz, 1H), 7.91 (d,  $J = 7.7$  Hz, 1H), 7.81 (d,  $J = 7.7$  Hz, 1H), 7.72 (t,  $J = 7.5$  Hz, 1H), 6.94 (d,  $J = 7.8$  Hz, 2H), 6.48 (d,  $J = 5.8$  Hz, 2H), 4.03 (ddd,  $J = 13.0$ , 7.5, 4.3 Hz, 1H), 3.54 (ddd,  $J = 16.7$ , 14.0, 2.4 Hz, 1H), 2.96 (ddd,  $J = 17.0$ , 7.5, 1.7 Hz, 1H), 2.25 (s, 3H).  $^{13}\text{C}$  NMR (101 MHz,

Chloroform-*d*)  $\delta$  185.4 (dd,  $^2J_{C-F} = 25.2, 23.3$  Hz), 173.4, 146.8 (d,  $^3J_{C-F} = 8.0$  Hz), 138.7, 138.1, 133.5 (dd,  $^4J_{C-F} = 4.7, 2.1$  Hz), 131.8, 129.4, 128.3 (d,  $^4J_{C-F} = 3.1$  Hz), 126.7 (d,  $^4J_{C-F} = 1.8$  Hz), 124.7 (d,  $^4J_{C-F} = 1.2$  Hz), 124.5, 115.8 (dd,  $^1J_{C-F} = 274.7, 259.8$  Hz), 86.8 (dd,  $^2J_{C-F} = 21.2, 16.7$  Hz), 52.5, 31.9 (d,  $^4J_{C-F} = 2.9$  Hz), 21.2.  $^{19}\text{F}$  NMR (376 MHz, Chloroform-*d*)  $\delta$  -108.9 (d,  $J = 270.7$  Hz), -129.8 (d,  $J = 267.0$  Hz). HRMS (ESI) calcd for  $\text{C}_{19}\text{H}_{14}\text{F}_2\text{NaO}_3$  ( $\text{M}+\text{Na}$ ) $^+$ : 351.0804, found 351.0812.

**(2*S*,3*R*)-2',2'-difluoro-3-(2-fluorophenyl)-3,4-dihydro-5*H*-spiro[furan-2,1'-**

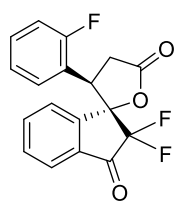

**indene]-3',5(2'*H*)-dione (3p).** White solid, MP: 130-131 °C; 46.5 mg,

70% yield, 98:2 er, >20:1 dr.  $[\alpha]_{\text{D}}^{23} = -8.491$  ( $C = 0.212$  in  $\text{CHCl}_3$ ).

HPLC DAICEL CHIRALCEL IG, n-hexane/Ethanol = 90/10, flow rate = 1.0 mL/min,  $\lambda = 254$  nm, retention time: 17.61 min (major),

21.05 min (minor).  $^1\text{H}$  NMR (400 MHz, Chloroform-*d*)  $\delta$  7.89-7.82 (m, 2H), 7.71 (d,  $J = 7.7$  Hz, 1H), 7.61 (t,  $J = 7.4$  Hz, 1H), 7.21-7.12 (m, 2H), 7.04 (t,  $J = 7.6$  Hz, 1H), 6.69 (t,  $J = 9.5$  Hz, 1H), 4.29 (ddd,  $J = 12.5, 7.8, 3.7$  Hz, 1H), 3.57-3.44 (m, 1H), 2.93 (dd,  $J = 17.2, 7.9$  Hz, 1H).  $^{13}\text{C}$  NMR (101 MHz, Chloroform-*d*)  $\delta$  185.4 (dd,  $^2J_{C-F} = 25.1, 23.3$  Hz), 172.9, 161.0 (d,  $^1J_{C-F} = 249.7$  Hz), 146.7 (d,  $^3J_{C-F} = 7.5$  Hz), 138.0, 132.6, 131.7, 130.9 (d,  $^3J_{C-F} = 8.3$  Hz), 130.0 (dd,  $^3J_{C-F} = 7.2, 3.1$  Hz), 124.7 (d,  $^2J_{C-F} = 34.1$  Hz), 124.5, 117.6, 117.5, 115.9 (dd,  $^1J_{C-F} = 272.6, 261.9$  Hz), 115.7 (d,  $^2J_{C-F} = 22.7$  Hz), 86.4 (dd,  $^2J_{C-F} = 21.7, 17.1$  Hz), 45.5, 34.2 (t,  $^4J_{C-F} = 1.6$  Hz).  $^{19}\text{F}$  NMR (376 MHz, Chloroform-*d*)  $\delta$  -110.5 (d,  $J = 270.7$  Hz), -114.7 (d,  $J = 3.8$  Hz), -128.5 (dd,  $J = 270.7, 3.8$  Hz). HRMS (ESI) calcd for  $\text{C}_{18}\text{H}_{12}\text{F}_3\text{O}_3$  ( $\text{M}+\text{H}$ ) $^+$ : 333.0734, found 333.0737.

**(2*S*,3*R*)-3-(2-chlorophenyl)-2',2'-difluoro-3,4-dihydro-5*H*-spiro[furan-2,1'-indene]-**

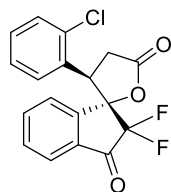

**3',5(2'*H*)-dione (3q).** White solid, MP: 152-153 °C; 47.4 mg, 68%

yield, 98:2 er, 3.6:1 dr.  $[\alpha]_{\text{D}}^{23} = -11.779$  ( $C = 0.416$  in  $\text{CHCl}_3$ ). HPLC

DAICEL CHIRALCEL IG, n-hexane/Ethanol = 90/10, flow rate = 1.0 mL/min,  $\lambda = 254$  nm, retention time: for minor diastereomer: 12.70

min (minor), 15.08 min (major); for major diastereomer: 17.77 min (major), 19.76 min (minor).  $^1\text{H}$  NMR (400 MHz, Chloroform-*d*)  $\delta$  7.97-7.85 (m, 2H), 7.76 (d,  $J = 7.7$  Hz, 1H), 7.70-7.63 (m, 1H), 7.52 (t,  $J = 7.3$  Hz, 1H), 7.30 (t,  $J = 7.4$  Hz, 1H), 7.24-7.17

(m, 1H), 7.15-7.12 (m, 1H), 4.63 (ddd,  $J = 12.2, 8.1, 3.6$  Hz, 1H), 3.49 (ddd,  $J = 17.3, 12.6, 2.1$  Hz, 1H), 3.06 (dd,  $J = 17.3, 8.1$  Hz, 1H).  $^{13}\text{C}$  NMR (101 MHz, Chloroform-*d*)  $\delta$  185.2 (dd,  $^2J_{\text{C-F}} = 24.8, 23.1$  Hz), 172.8, 146.7 (d,  $^3J_{\text{C-F}} = 7.0$  Hz), 137.8, 135.8, 132.5 (dd,  $^4J_{\text{C-F}} = 4.4, 2.3$  Hz), 131.8, 130.5 (d,  $^3J_{\text{C-F}} = 7.0$  Hz), 130.2, 130.1, 128.1, 127.2, 125.3 (d,  $^4J_{\text{C-F}} = 1.6$  Hz), 124.9, 116.2 (dd,  $^1J_{\text{C-F}} = 273.1, 261.6$  Hz), 86.7 (dd,  $^2J_{\text{C-F}} = 22.0, 17.1$  Hz), 47.2, 33.7 (d,  $^1J_{\text{C-F}} = 2.3$  Hz).  $^{19}\text{F}$  NMR (376 MHz, Chloroform-*d*)  $\delta$  -110.2 (d,  $J = 267.0$  Hz), -128.1 (d,  $J = 267.0$  Hz). HRMS (ESI) calcd for  $\text{C}_{18}\text{H}_{12}\text{ClF}_2\text{O}_3$  ( $\text{M}+\text{H}$ ) $^+$ : 349.0438, found 349.0442.

**(2*S*,3*R*)-3-(2-bromophenyl)-2',2'-difluoro-3,4-dihydro-5*H*-spiro[furan-2,1'-indene]-**

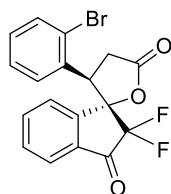

**3',5(2'H)-dione (3r).** White solid, MP: 162-164 °C; 47.2 mg, 60% yield, 98:2 er, 5:1 dr.  $[\alpha]_{\text{D}}^{23} = -11.276$  ( $C = 0.269$  in  $\text{CHCl}_3$ ). HPLC DAICEL CHIRALCEL IG, n-hexane/Ethanol = 95/5, flow rate = 1.0 mL/min,  $\lambda = 254$  nm, retention time: for minor diastereomer: 19.44 min (minor),

23.66 min (major); for major diastereomer: 32.43 min (major), 35.38 min (minor).  $^1\text{H}$  NMR (400 MHz, Chloroform-*d*)  $\delta$  7.98-7.83 (m, 2H), 7.79 (d,  $J = 7.7$  Hz, 1H), 7.73-7.63 (m, 1H), 7.53 (t,  $J = 7.5$  Hz, 1H), 7.36 (m, 2H), 7.14 (m, 1H), 4.66 (ddd,  $J = 11.8, 8.3, 3.4$  Hz, 1H), 3.44 (ddd,  $J = 17.5, 11.9, 2.1$  Hz, 1H), 3.12 (ddd,  $J = 17.4, 8.3, 1.4$  Hz, 1H).  $^{13}\text{C}$  NMR (101 MHz, Chloroform-*d*)  $\delta$  185.3 (dd,  $^2J_{\text{C-F}} = 24.6, 23.7$  Hz), 172.8, 146.7 (d,  $^3J_{\text{C-F}} = 7.3$  Hz), 137.8, 133.6, 132.6, 131.9, 130.5, 130.3, 127.9, 126.8, 125.6, 125.0, 116.2 (dd,  $^1J_{\text{C-F}} = 272.4, 262.5$  Hz), 86.8 (dd,  $^2J_{\text{C-F}} = 22.4, 17.2$  Hz), 49.1, 34.4 (d,  $^4J_{\text{C-F}} = 1.9$  Hz).  $^{19}\text{F}$  NMR (376 MHz, Chloroform-*d*)  $\delta$  -111.1 (d,  $J = 267.0$  Hz), -127.1 (d,  $J = 267.0$  Hz). HRMS (ESI) calcd for  $\text{C}_{18}\text{H}_{12}\text{BrF}_2\text{O}_3$  ( $\text{M}+\text{H}$ ) $^+$ : 392.9933, 394.9912, found 392.39930, 394.9903.

**(2*S*,3*R*)-2',2'-difluoro-3-(*o*-tolyl)-3,4-dihydro-5*H*-spiro[furan-2,1'-indene]-**

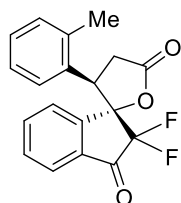

**3',5(2'H)-dione (3s).** White solid, MP: 192-193 °C; 42.7 mg, 65% yield, 97.5:2.5 er, 3.6:1 dr.  $[\alpha]_{\text{D}}^{23} = -17.087$  ( $C = 0.119$  in  $\text{CHCl}_3$ ). HPLC DAICEL CHIRALCEL IG, n-hexane/Ethanol = 94/6, flow rate = 1.0 mL/min,  $\lambda = 254$  nm, retention time: for minor diastereomer:

18.09 min (major), 23.32 min (minor); for major diastereomer: 29.70 min (major),

32.20 min (minor).  $^1\text{H}$  NMR (400 MHz, Chloroform-*d*)  $\delta$  7.98-7.83 (m, 2H), 7.79 (d,  $J = 7.7$  Hz, 1H), 7.73-7.63 (m, 1H), 7.53 (t,  $J = 7.5$  Hz, 1H), 7.36 (m, 2H), 7.14 (m, 1H), 4.66 (ddd,  $J = 11.8, 8.3, 3.4$  Hz, 1H), 3.44 (ddd,  $J = 17.5, 11.9, 2.1$  Hz, 1H), 3.12 (ddd,  $J = 17.4, 8.3, 1.4$  Hz, 1H).  $^{13}\text{C}$  NMR (101 MHz, Chloroform-*d*)  $\delta$  185.3 (dd,  $^2J_{\text{C-F}} = 24.6, 23.7$  Hz), 172.8, 146.7 (d,  $^3J_{\text{C-F}} = 7.3$  Hz), 137.8, 133.6, 132.6, 131.9, 130.5, 130.3, 127.9, 126.8, 125.6, 125.0, 116.2 (dd,  $^1J_{\text{C-F}} = 272.4, 262.5$  Hz), 86.8 (dd,  $^2J_{\text{C-F}} = 22.4, 17.2$  Hz), 49.1, 34.4 (d,  $^4J_{\text{C-F}} = 1.9$  Hz).  $^{19}\text{F}$  NMR (376 MHz, Chloroform-*d*)  $\delta$  -111.1 (d,  $J = 267.0$  Hz), -127.1 (d,  $J = 267.0$  Hz). HRMS (ESI) calcd for  $\text{C}_{19}\text{H}_{14}\text{F}_2\text{NaO}_3$  ( $\text{M}+\text{Na}$ ) $^+$ : 351.0804, found 351.0812.

**(2*S*,3*R*)-2',2'-difluoro-3-(2-methoxyphenyl)-3,4-dihydro-5H-spiro[furan-2,1'-**

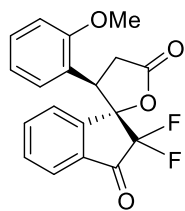

**indene]-3',5(2'H)-dione (3t).** White solid, MP: 164-165 °C; 47.5 mg, 69% yield, 96:4 er, >20:1 dr.  $[\alpha]_{\text{D}}^{23} = -75.877$  ( $\text{C} = 0.228$  in  $\text{CHCl}_3$ ). HPLC DAICEL CHIRALCEL IC, n-hexane/2-propanol = 80/20, flow rate = 1.0 mL/min,  $\lambda = 254$  nm, retention time: 15.21 min

(major), 19.94 min (minor).  $^1\text{H}$  NMR (300 MHz, Chloroform-*d*)  $\delta$  7.92 (d,  $J = 6.4$  Hz, 2H), 7.73 (d,  $J = 7.7$  Hz, 1H), 7.66-7.60 (m, 1H), 7.39-7.28 (m, 1H), 7.26-7.20 (m, 1H), 6.95 (t,  $J = 7.6$  Hz, 1H), 6.55 (d,  $J = 8.2$  Hz, 1H), 4.50 (ddd,  $J = 12.7, 8.0, 3.9$  Hz, 1H), 3.53 (ddd,  $J = 16.4, 13.7, 2.3$  Hz, 1H), 3.01 (s, 3H), 2.90 (ddd,  $J = 17.1, 8.0, 1.7$  Hz, 1H).  $^{13}\text{C}$  NMR (101 MHz, Chloroform-*d*)  $\delta$  185.5 (dd,  $^2J_{\text{C-F}} = 24.2, 23.2$  Hz), 173.7, 157.0, 148.3 (d,  $^3J_{\text{C-F}} = 7.5$  Hz), 137.1, 132.6 (dd,  $^4J_{\text{C-F}} = 4.0, 2.0$  Hz), 131.0, 130.3, 129.7 (d,  $^3J_{\text{C-F}} = 8.0$  Hz), 125.0 (d,  $^4J_{\text{C-F}} = 1.5$  Hz), 124.0, 120.7, 118.2, 116.3 (dd,  $^1J_{\text{C-F}} = 274.1, 260.1$  Hz), 110.0, 86.5 (dd,  $^2J_{\text{C-F}} = 21.4, 16.9$  Hz), 54.5, 45.4, 32.5 (d,  $^4J_{\text{C-F}} = 2.7$  Hz).  $^{19}\text{F}$  NMR (376 MHz, Chloroform-*d*)  $\delta$  -109.9 (d,  $J = 267.0$  Hz), -129.1 (d,  $J = 263.2$  Hz). HRMS (ESI) calcd for  $\text{C}_{19}\text{H}_{15}\text{F}_2\text{O}_4$  ( $\text{M}+\text{H}$ ) $^+$ : 345.0933, found 345.0934.

**(2*S*,3*R*)-2',2'-difluoro-3-(naphthalen-2-yl)-3,4-dihydro-5H-spiro[furan-2,1'-**

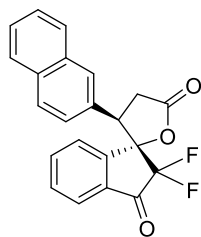

**indene]-3',5(2'H)-dione (3u).** White solid, MP: 213-215 °C; 42.3 mg, 58% yield, 97:3 er, >20:1 dr.  $[\alpha]_{\text{D}}^{23} = 33.452$  ( $\text{C} = 0.278$  in  $\text{CHCl}_3$ ). HPLC DAICEL CHIRALCEL IG, n-hexane/Ethanol = 80/20, flow rate = 1.0 mL/min,  $\lambda = 254$  nm, retention time: 13.22 min (major),



16.01 min (minor).  $^1\text{H}$  NMR (300 MHz, Chloroform-*d*)  $\delta$  8.09-7.94 (m, 2H), 7.84-7.70 (m, 3H), 7.59 (d,  $J = 8.3$  Hz, 2H), 7.48-7.41 (m, 2H), 7.15 (s, 1H), 6.57 (dd,  $J = 8.6, 2.1$  Hz, 1H), 4.26 (ddd,  $J = 12.8, 7.5, 4.2$  Hz, 1H), 3.70 (ddd,  $J = 16.4, 13.9, 2.3$  Hz, 1H), 3.08 (ddd,  $J = 16.9, 7.5, 1.6$  Hz, 1H).  $^{13}\text{C}$  NMR (101 MHz, Chloroform-*d*)  $\delta$  185.4 (dd,  $^2J_{\text{C-F}} = 25.4, 24.0$  Hz), 173.2, 146.8 (d,  $^3J_{\text{C-F}} = 8.0$  Hz), 138.2, 133.5 (dd,  $^4J_{\text{C-F}} = 4.6, 2.8$  Hz), 132.94, 132.86, 131.9, 128.4, 128.1 (d,  $^4J_{\text{C-F}} = 3.1$  Hz), 127.9, 127.7, 127.5 (d,  $^4J_{\text{C-F}} = 1.9$  Hz), 126.9, 126.8, 125.3 (d,  $^4J_{\text{C-F}} = 2.8$  Hz), 124.8, 124.6, 115.7 (dd,  $^1J_{\text{C-F}} = 274.1, 260.9$  Hz), 86.8 (dd,  $^2J_{\text{C-F}} = 21.3, 16.8$  Hz), 52.6, 32.0 (d,  $^4J_{\text{C-F}} = 2.9$  Hz).  $^{19}\text{F}$  NMR (282 MHz, Chloroform-*d*)  $\delta$  -109.1 (d,  $J = 270.7$  Hz), -128.8 (d,  $J = 270.7$  Hz). HRMS (ESI) calcd for  $\text{C}_{22}\text{H}_{15}\text{F}_2\text{O}_3$  ( $\text{M}+\text{H}$ ) $^+$ : 365.0984, found 365.0991.

**(2*S*,3*R*)-2',2'-difluoro-3-(naphthalen-1-yl)-3,4-dihydro-5H-spiro[furan-2,1'-**

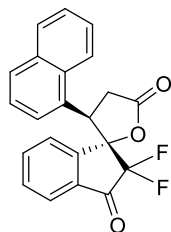

**indene]-3',5(2'H)-dione (3v).** White solid, MP: 249-251 °C; 39.3 mg, 54% yield, 97:3 er, >20:1 dr.  $[\alpha]_{\text{D}}^{23} = -25.510$  ( $C = 0.098$  in  $\text{CHCl}_3$ ). HPLC DAICEL CHIRALCEL IG, n-hexane/Ethanol = 85/15, flow rate = 1.0 mL/min,  $\lambda = 254$  nm, retention time: 12.35 min (major),

15.09 min (minor).  $^1\text{H}$  NMR (300 MHz, DMSO-*d*<sub>6</sub>)  $\delta$  8.34 (d,  $J = 7.8$  Hz, 1H), 8.14 (t,  $J = 7.8$  Hz, 1H), 7.84-7.73 (m, 3H), 7.65 (t,  $J = 7.6$  Hz, 1H), 7.47 (t,  $J = 7.8$  Hz, 1H), 7.33 (d,  $J = 7.8$  Hz, 1H), 7.23 (t,  $J = 7.4$  Hz, 1H), 6.84 -6.65 (m, 2H), 5.28 (ddd,  $J = 12.6, 7.8, 4.1$  Hz, 1H), 3.91 (ddd,  $J = 17.5, 12.9, 2.4$  Hz, 1H), 3.15-3.03 (m, 1H).  $^{13}\text{C}$  NMR (101 MHz, DMSO-*d*<sub>6</sub>)  $\delta$  184.94 (t,  $^2J_{\text{C-F}} = 23.5$  Hz), 174.43, 147.0 (d,  $^3J_{\text{C-F}} = 7.6$  Hz), 139.14, 133.41, 132.38, 132.06, 132.0 (d,  $^4J_{\text{C-F}} = 3.2$  Hz), 129.58, 129.02, 128.4 (d,  $^3J_{\text{C-F}} = 8.9$  Hz), 126.61, 126.16, 126.00, 125.53, 125.47, 124.61, 121.83, 116.8 (dd,  $^1J_{\text{C-F}} = 277.5, 254.4$  Hz), 86.8 (dd,  $^2J_{\text{C-F}} = 20.7, 16.3$  Hz), 45.78, 33.08.  $^{19}\text{F}$  NMR (282 MHz, DMSO-*d*<sub>6</sub>)  $\delta$  -108.0 (d,  $J = 345.9$  Hz), -130.0 (d,  $J = 349.7$  Hz). HRMS (ESI) calcd for  $\text{C}_{22}\text{H}_{15}\text{F}_2\text{O}_3$  ( $\text{M}+\text{H}$ ) $^+$ : 365.0984, found 365.0991.

**(2*S*,3*S*)-2',2'-difluoro-3-(thiophen-2-yl)-3,4-dihydro-5H-spiro[furan-2,1'-indene]-**

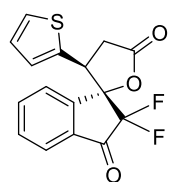

**3',5(2'H)-dione (3w).** Yellow solid, MP: 145-146 °C; 42.9 mg, 67% yield, 98:2 er, >20:1 dr.  $[\alpha]_{\text{D}}^{23} = 33.452$  ( $C = 0.278$  in  $\text{CHCl}_3$ ). HPLC DAICEL CHIRALCEL IG, n-hexane/Ethanol = 80/20, flow rate = 1.0

mL/min,  $\lambda = 254$  nm, retention time: 10.67 min (major), 13.72 min (minor).  $^1\text{H}$  NMR (300 MHz, Chloroform-*d*)  $\delta$  8.03-7.93 (m, 1H), 7.88 (d,  $J = 8.1$  Hz, 2H), 7.74 (t,  $J = 7.3$  Hz, 1H), 7.14 (dd,  $J = 5.2, 1.1$  Hz, 1H), 6.86 (dd,  $J = 5.2, 3.6$  Hz, 1H), 6.54 (s, 1H), 4.33-4.14 (m, 1H), 3.48 (ddd,  $J = 16.5, 13.8, 2.5$  Hz, 1H), 3.12 (ddd,  $J = 17.1, 7.7, 1.8$  Hz, 1H).  $^{13}\text{C}$  NMR (101 MHz, Chloroform-*d*)  $\delta$  185.4 (dd,  $^2J_{\text{C-F}} = 275.2, 258.9$  Hz), 172.5, 146.0 (d,  $^3J_{\text{C-F}} = 8.0$  Hz), 138.2, 133.8 (dd,  $^4J_{\text{C-F}} = 4.6, 2.1$  Hz), 132.7 (d,  $^4J_{\text{C-F}} = 1.8$  Hz), 132.0, 127.5 (d,  $^4J_{\text{C-F}} = 3.4$  Hz), 127.3, 126.3, 124.7 (d,  $^4J_{\text{C-F}} = 1.7$  Hz), 124.6, 115.7 (dd,  $^1J_{\text{C-F}} = 25.2, 23.2$  Hz), 86.3 (dd,  $^2J_{\text{C-F}} = 20.9, 17.0$  Hz), 48.5, 33.7 (d,  $^4J_{\text{C-F}} = 3.2$  Hz).  $^{19}\text{F}$  NMR (282 MHz, Chloroform-*d*)  $\delta$  -108.8 (d,  $J = 270.7$  Hz), -130.0 (d,  $J = 270.7$  Hz). HRMS (ESI) calcd for  $\text{C}_{16}\text{H}_{11}\text{F}_2\text{O}_3\text{S}$  ( $\text{M}+\text{H}$ ) $^+$ : 321.0392, found 321.0393.

**(2S,3S)-3-(benzo[*b*]thiophen-2-yl)-2',2'-difluoro-3,4-dihydro-5H-spiro[furan-2,1'-**

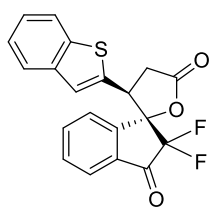

**indene]-3',5(2'H)-dione (3x).** Yellow solid, MP: 213-215 °C; 39.3 mg, 53% yield, 97:3 er, >20:1 dr.  $[\alpha]_{\text{D}}^{23} = 4.977$  ( $C = 0.221$  in  $\text{CHCl}_3$ ). HPLC DAICEL CHIRALCEL IG, n-hexane/Ethanol = 90/10, flow rate = 1.0 mL/min,  $\lambda = 254$  nm, retention time: 18.06

min (major), 21.66 min (minor).  $^1\text{H}$  NMR (400 MHz, DMSO-*d*<sub>6</sub>)  $\delta$  8.29 (d,  $J = 7.8$  Hz, 1H), 8.26-8.15 (m, 1H), 8.03 (d,  $J = 7.7$  Hz, 1H), 7.93 (t,  $J = 7.5$  Hz, 1H), 7.82-7.71 (m, 2H), 7.39-7.22 (m, 3H), 4.85 (ddd,  $J = 12.4, 7.6, 4.3$  Hz, 1H), 3.67 (ddd,  $J = 17.2, 13.1, 2.1$  Hz, 1H), 3.29 (dd,  $J = 17.3, 7.7$  Hz, 1H).  $^{13}\text{C}$  NMR (101 MHz, DMSO-*d*<sub>6</sub>)  $\delta$  186.01 (t,  $^2J_{\text{C-F}} = 24.6$  Hz), 172.76, 146.08 (d,  $^3J_{\text{C-F}} = 7.8$  Hz), 139.34, 138.72, 138.64, 135.08, 135.06, 132.89, 132.81, 126.08, 124.72, 124.58, 124.0 (d,  $^4J_{\text{C-F}} = 3.3$  Hz), 123.55, 122.27, 115.39 (dd,  $^1J_{\text{C-F}} = 275.2, 258.9$  Hz), 84.91 (dd,  $^2J_{\text{C-F}} = 21.0, 16.3$  Hz), 47.05, 32.89.  $^{19}\text{F}$  NMR (376 MHz, DMSO-*d*<sub>6</sub>)  $\delta$  -107.8 (d,  $J = 270.7$  Hz), -128.0 (d,  $J = 270.7$  Hz). HRMS (ESI) calcd for  $\text{C}_{20}\text{H}_{13}\text{F}_2\text{O}_3\text{S}$  ( $\text{M}+\text{H}$ ) $^+$ : 371.0548, found 371.0551.

**(2S,3R)-4',5',6',7'-tetrachloro-3-(4-chlorophenyl)-2',2'-difluoro-3,4-dihydro-5H-**

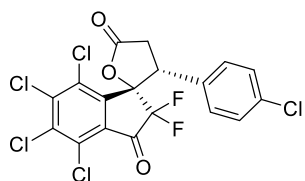

**spiro[furan-2,1'-indene]-3',5(2'H)-dione (3y).** White solid, MP: 208-209 °C; 52.5 mg, 54% yield, 92:8 er, >20:1 dr.  $[\alpha]_{\text{D}}^{23} = +33.452$  ( $C = 0.278$  in  $\text{CHCl}_3$ ). HPLC DAICEL CHIRALCEL IG, n-hexane/Ethanol = 80/20, flow rate = 1.0 mL/min,  $\lambda = 254$

nm, retention time: 7.28 min (major), 8.83 min (minor).  $^1\text{H}$  NMR (400 MHz, Chloroform-*d*)  $\delta$  7.23 (d,  $J = 8.2$  Hz, 2H), 6.66 (d,  $J = 6.0$  Hz, 2H), 4.45 (ddd,  $J = 13.2, 8.0, 4.2$  Hz, 1H), 3.51 (ddd,  $J = 16.7, 13.9, 2.5$  Hz, 1H), 3.03 (dd,  $J = 17.1, 8.0$  Hz, 1H).  $^{13}\text{C}$  NMR (101 MHz, Chloroform-*d*)  $\delta$  171.07 (t,  $^2J_{\text{C-F}} = 26.9$  Hz), 162.96, 134.58, 131.8 (d,  $^3J_{\text{C-F}} = 9.0$  Hz), 129.20, 126.12, 121.83, 121.53, 120.93, 120.90, 119.89, 118.52, 105.33 (dd,  $^1J_{\text{C-F}} = 274.5, 255.4$  Hz), 76.6 (dd,  $^2J_{\text{C-F}} = 22.1, 16.7$  Hz), 38.16, 21.4 (d,  $^4J_{\text{C-F}} = 2.9$  Hz).  $^{19}\text{F}$  NMR (376 MHz, Chloroform-*d*)  $\delta$  -106.9 (d,  $J = 267.0$  Hz), -131.2 (d,  $J = 270.7$  Hz). HRMS (ESI) calcd for  $\text{C}_{18}\text{H}_8\text{C}_{15}\text{F}_2\text{O}$  ( $\text{M}+\text{H}$ ) $^+$ : 484.8879, found 484.8911.

**(*R*)-3-(4-chlorophenyl)-3-((*S*)-2,2-difluoro-1-hydroxy-3-oxo-2,3-dihydro-1H-**

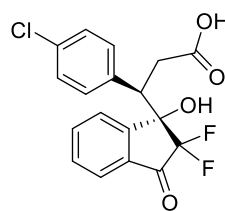

**inden-1-yl)propanoic acid (6).** White solid, MP: 163-165 °C; 66.0 mg, 90% yield, 97:3 er, >20:1 dr.  $[\alpha]_{\text{D}}^{23} = 537.143$  ( $C = 0.070$  in  $\text{CHCl}_3$ ). HPLC DAICEL CHIRALCEL IC, n-hexane/2-propanol = 90/10, flow rate = 1.0 mL/min,  $\lambda = 254$  nm, retention time: 6.69 min (minor), 8.54 min (major).  $^1\text{H}$  NMR (400 MHz,  $\text{DMSO-}d_6$ )  $\delta$  12.23 (s, 1H), 7.95 (m,  $J = 7.4, 1.5$  Hz, 1H), 7.66 (m,  $J = 22.0, 14.7, 7.7$  Hz, 3H), 7.13 (d,  $J = 8.3$  Hz, 2H), 6.81 (d,  $J = 8.0$  Hz, 2H), 3.79-3.68 (m, 1H), 3.41 (s, 1H), 3.02 (d,  $J = 16.5$  Hz, 1H), 2.78-2.66 (m, 1H).  $^{13}\text{C}$  NMR (101 MHz,  $\text{DMSO-}d_6$ )  $\delta$  188.3 (dd,  $^2J_{\text{C-F}} = 25.9, 24.1$  Hz), 172.54, 151.8 (d,  $^3J_{\text{C-F}} = 9.8$  Hz), 137.76, 135.71, 131.82, 131.49, 131.28, 130.75, 127.61, 126.24, 123.50, 117.4 (dd,  $^1J_{\text{C-F}} = 274.3, 254.2$  Hz), 77.9 (dd,  $^2J_{\text{C-F}} = 20.8, 17.7$  Hz), 49.75, 33.5 (d,  $^4J_{\text{C-F}} = 5.1$  Hz).  $^{19}\text{F}$  NMR (376 MHz,  $\text{DMSO-}d_6$ )  $\delta$  -108.6 (d,  $J = 270.7$  Hz), -129.5 (d,  $J = 267.0$  Hz). HRMS (ESI) calcd for  $\text{C}_{18}\text{H}_{14}\text{ClF}_2\text{O}_4$  ( $\text{M}+\text{H}$ ) $^+$ : 367.0543, found 367.0543.

**2,2-difluoro-4'-phenylspiro[indene-1,2'-pyran]-3,6'(2H,3'H)-dione (8).** White solid,

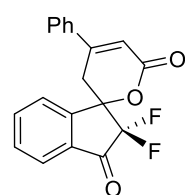

MP: 185-187 °C; 56.8 mg, 87% yield, 90:10 er.  $[\alpha]_{\text{D}}^{23} = 83.162$  ( $C = 0.679$  in  $\text{CHCl}_3$ ). HPLC DAICEL CHIRALCEL IC, n-hexane/2-propanol = 60/40, flow rate = 1.0 mL/min,  $\lambda = 254$  nm, retention time: 13.23 min (major), 19.35 min (minor).  $^1\text{H}$  NMR (300 MHz, Chloroform-*d*)  $\delta$  7.92 (m, 3H), 7.72 (t,  $J = 7.0$  Hz, 1H), 7.56 (m, 2H), 7.52-7.40 (m,

3H), 6.49 (d,  $J = 2.4$  Hz, 1H), 3.50 (dq,  $J = 17.9, 3.2$  Hz, 1H), 3.27 (dd,  $J = 17.9, 2.7$  Hz, 1H).  $^{13}\text{C}$  NMR (101 MHz, Chloroform-*d*)  $\delta$  187.9 (t,  $^2J_{\text{C-F}} = 26.4$  Hz), 162.53, 152.80, 148.4 (t,  $^4J_{\text{C-F}} = 4.0$  Hz), 138.20, 135.32, 132.17, 132.0 (t,  $^4J_{\text{C-F}} = 3.8$  Hz), 131.24, 129.20, 126.30, 125.77, 125.21, 114.3 (dd,  $^1J_{\text{C-F}} = 273.2, 265.2$  Hz), 111.61, 81.1 (dd,  $^2J_{\text{C-F}} = 23.5, 18.2$  Hz), 31.2 (d,  $^3J_{\text{C-F}} = 6.4$  Hz).  $^{19}\text{F}$  NMR (282 MHz, Chloroform-*d*)  $\delta$  -115.8 (d,  $J = 279.7$  Hz), -117.7 (d,  $J = 280.0$  Hz). HRMS (ESI) calcd for  $\text{C}_{19}\text{H}_{13}\text{F}_2\text{O}_3$  ( $\text{M}+\text{H}$ ) $^+$ : 327.0827, found 327.0827.

### References:

1. Zhang, J.; Liang, Z.; Zhang, S.; Du, D. *Org. Chem. Front.* **2022**, *9*, 3763-3768.
2. Matarlo, J.; Evans, C.; Sharma I; Tonge, P. *Biochem.* **2015**, *54*, 6514-6524.

## 8. Copies of the NMR Spectra

**3a**  $^1\text{H}$  NMR (300 MHz, Chloroform-d) /  $^{13}\text{C}$  { $^1\text{H}$ } NMR (101 MHz, Chloroform-d)

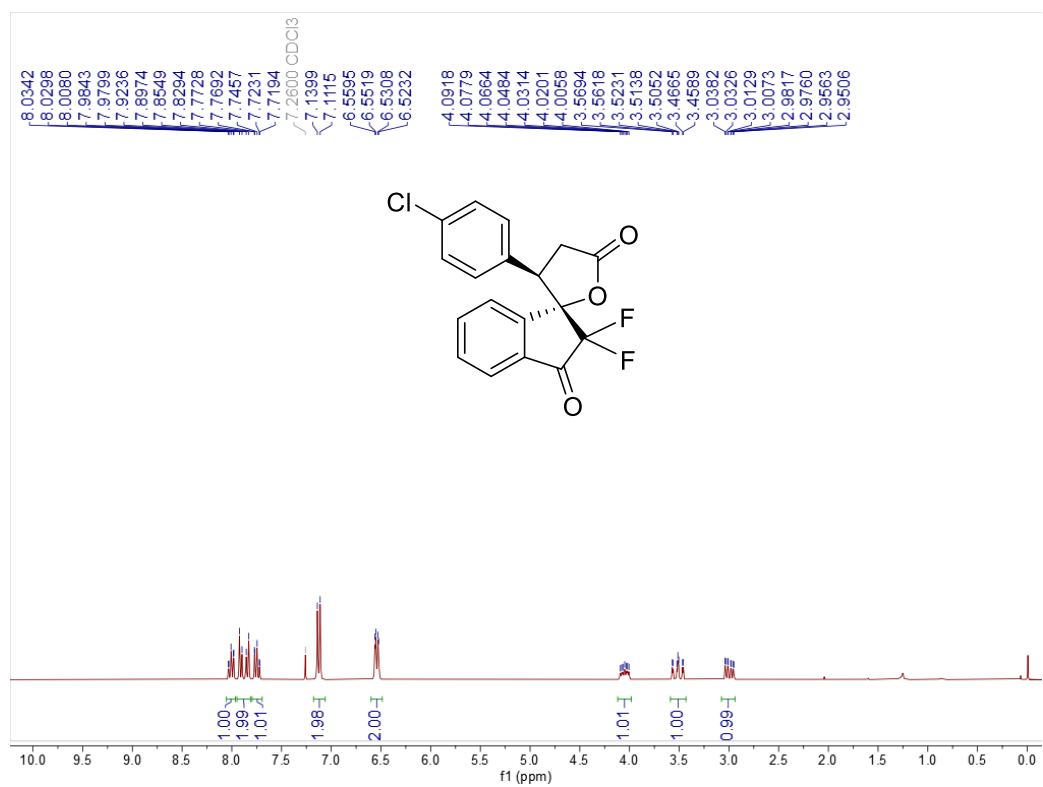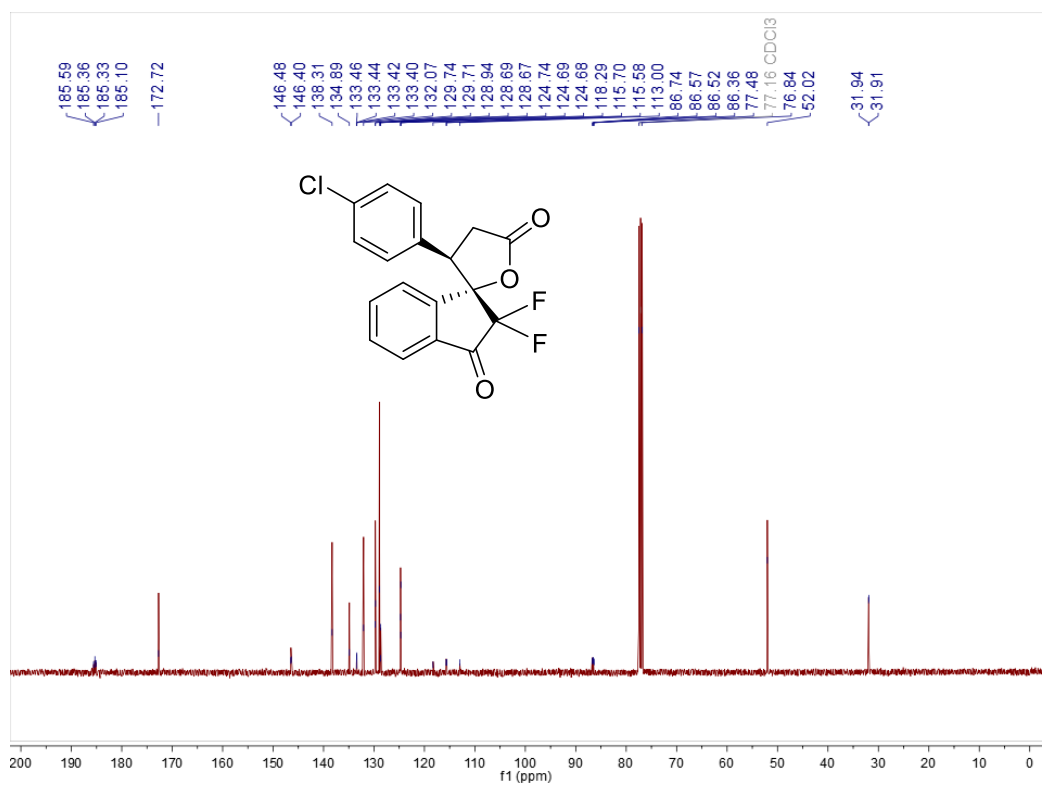

**3a**  $^{19}\text{F}$  NMR (376 MHz, Chloroform-*d*)

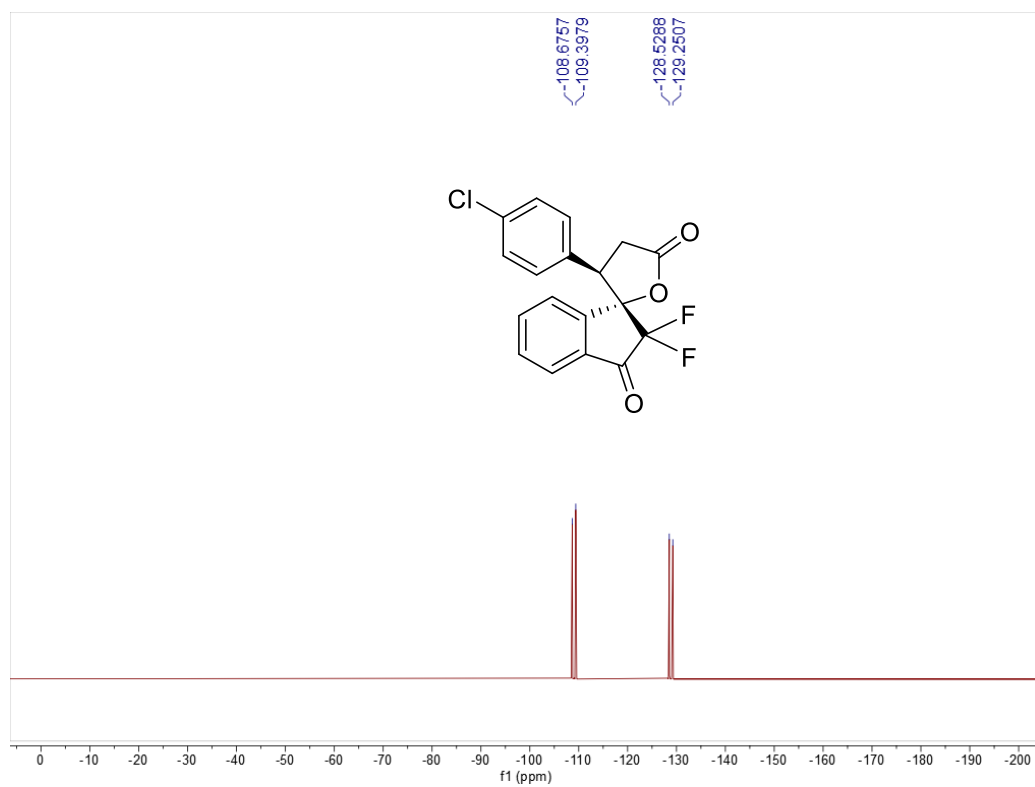

**3b**  $^1\text{H}$  NMR (400 MHz, Chloroform-*d*)/ $^{13}\text{C}$ {1H} NMR (101 MHz, Chloroform-*d*)

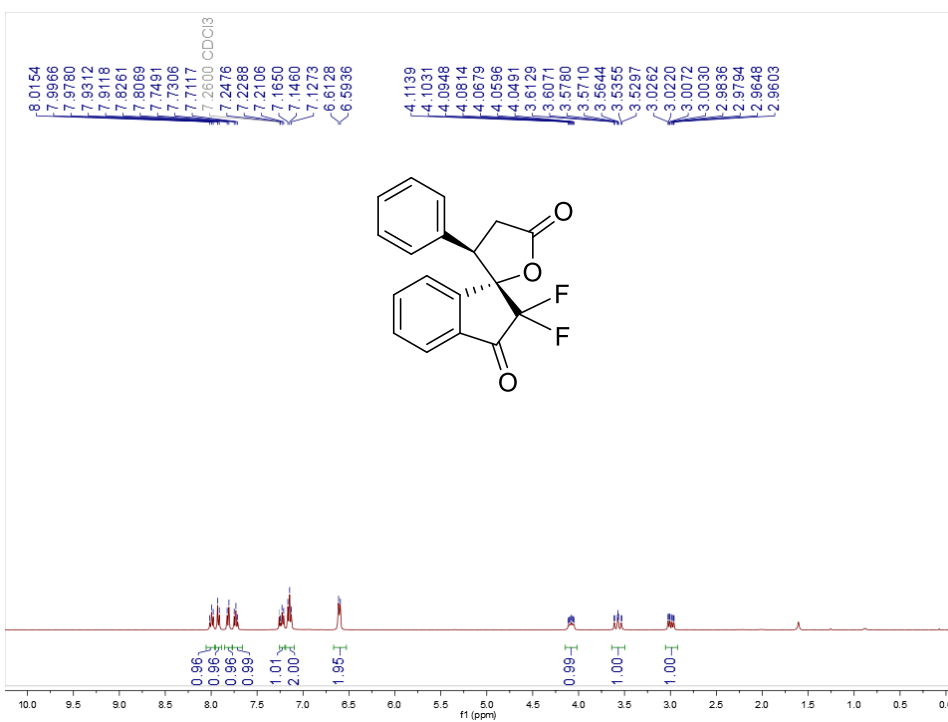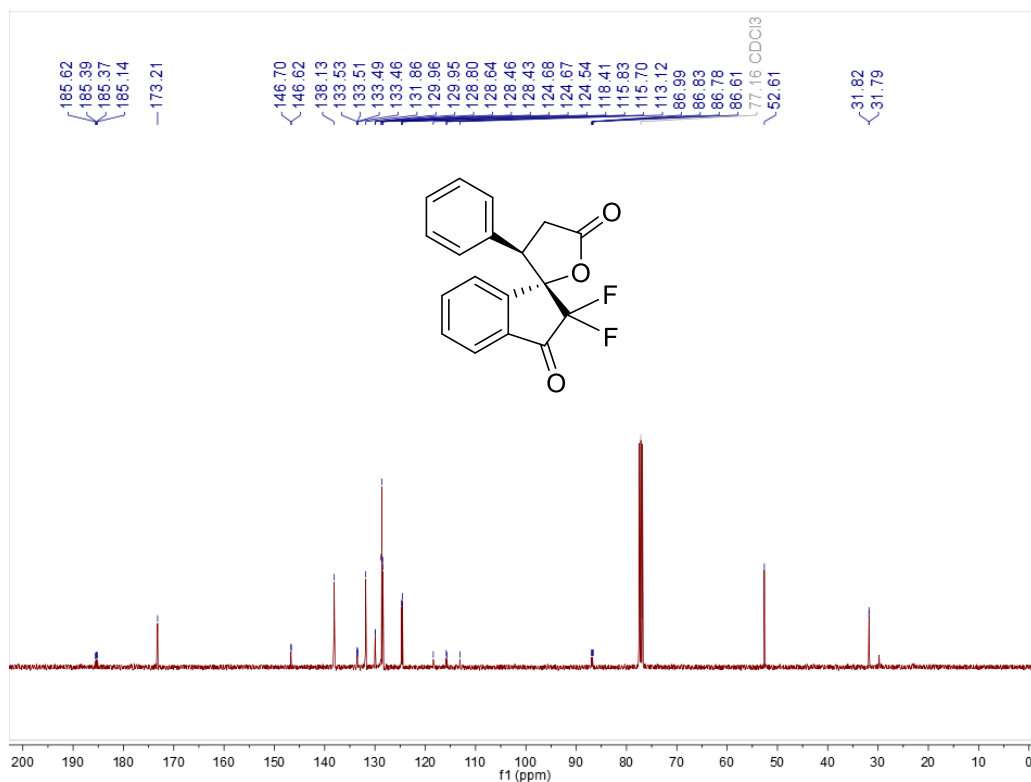

**3b**  $^{19}\text{F}$  NMR (376 MHz, Chloroform-*d*)

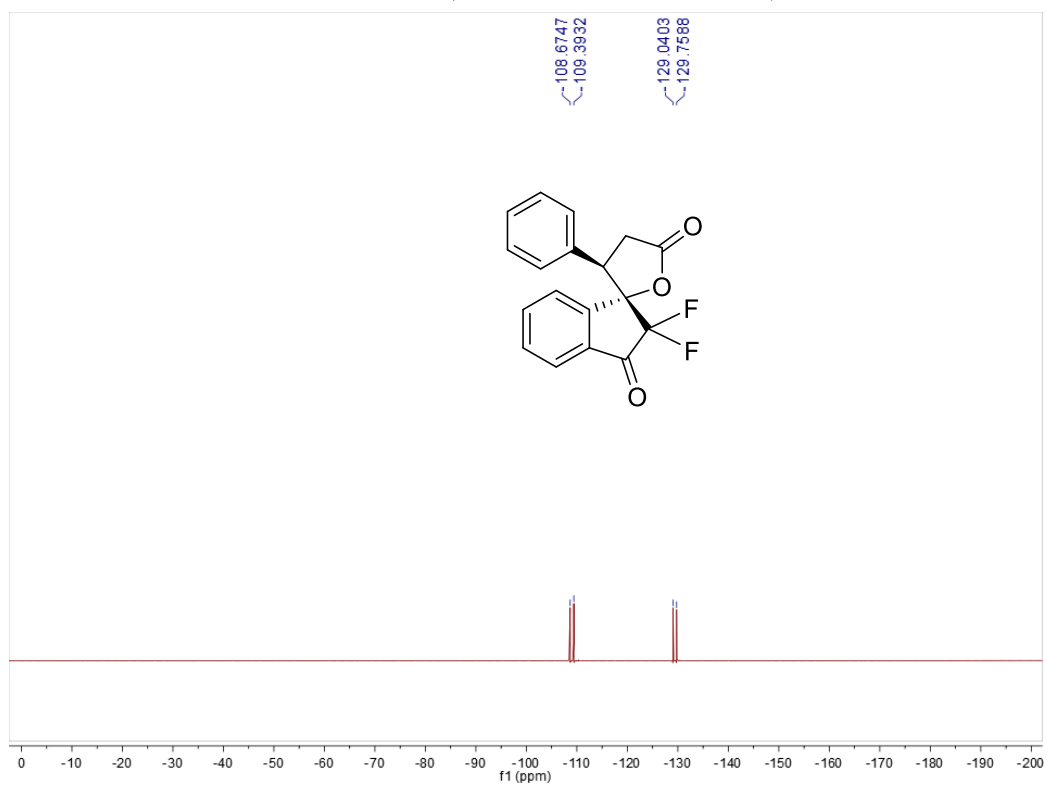



**3c**  $^1\text{H}$  NMR (400 MHz, Chloroform-*d*)/ $^{13}\text{C}$ {H} NMR (101 MHz, Chloroform-*d*)

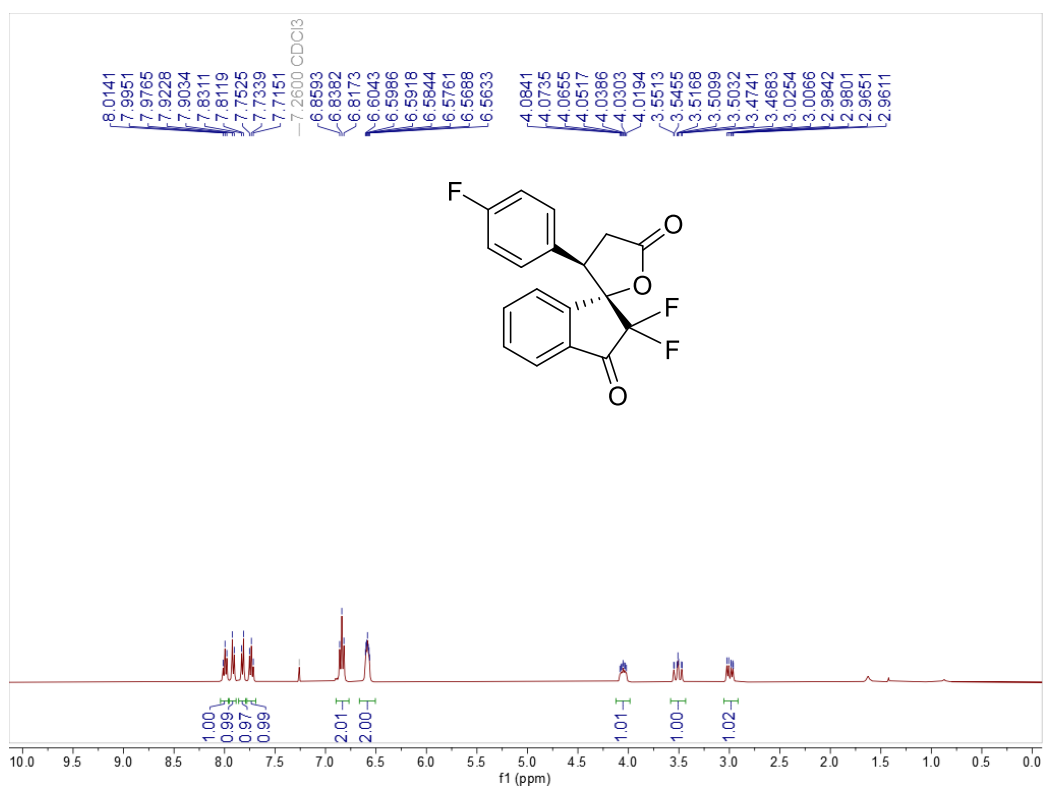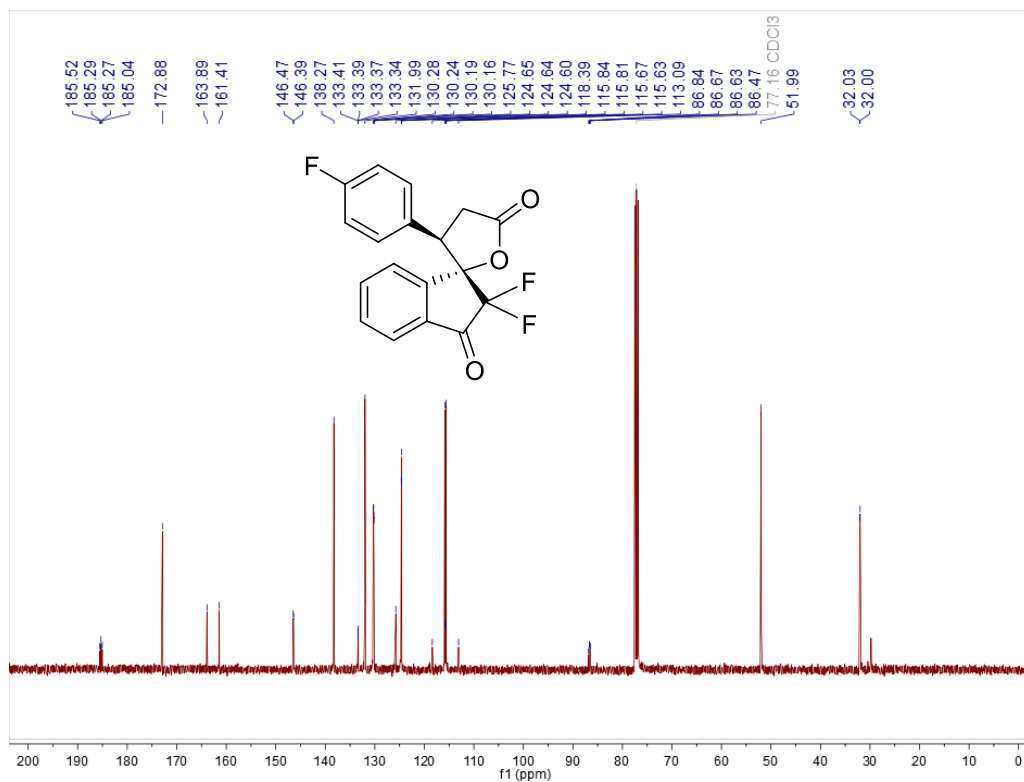

**3c**  $^{19}\text{F}$  NMR (376 MHz, Chloroform-*d*)

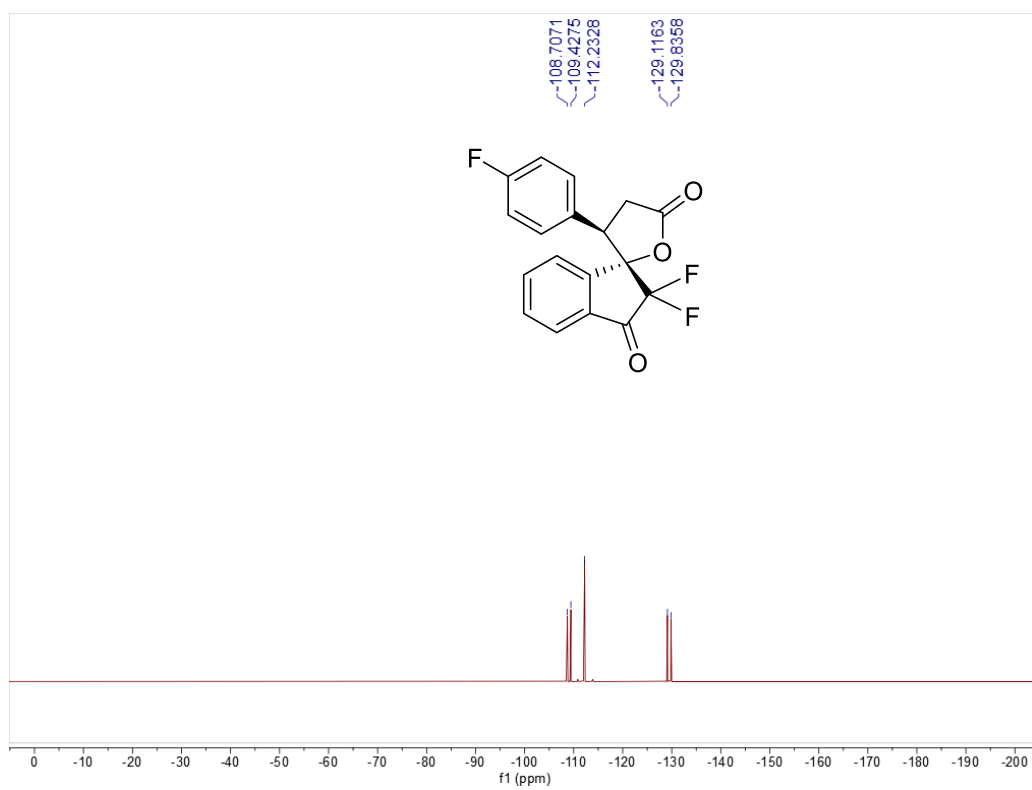

**3d**  $^1\text{H}$  NMR (400 MHz, Chloroform-*d*)/  $^{13}\text{C}$ {H} NMR (101 MHz, Chloroform-*d*)

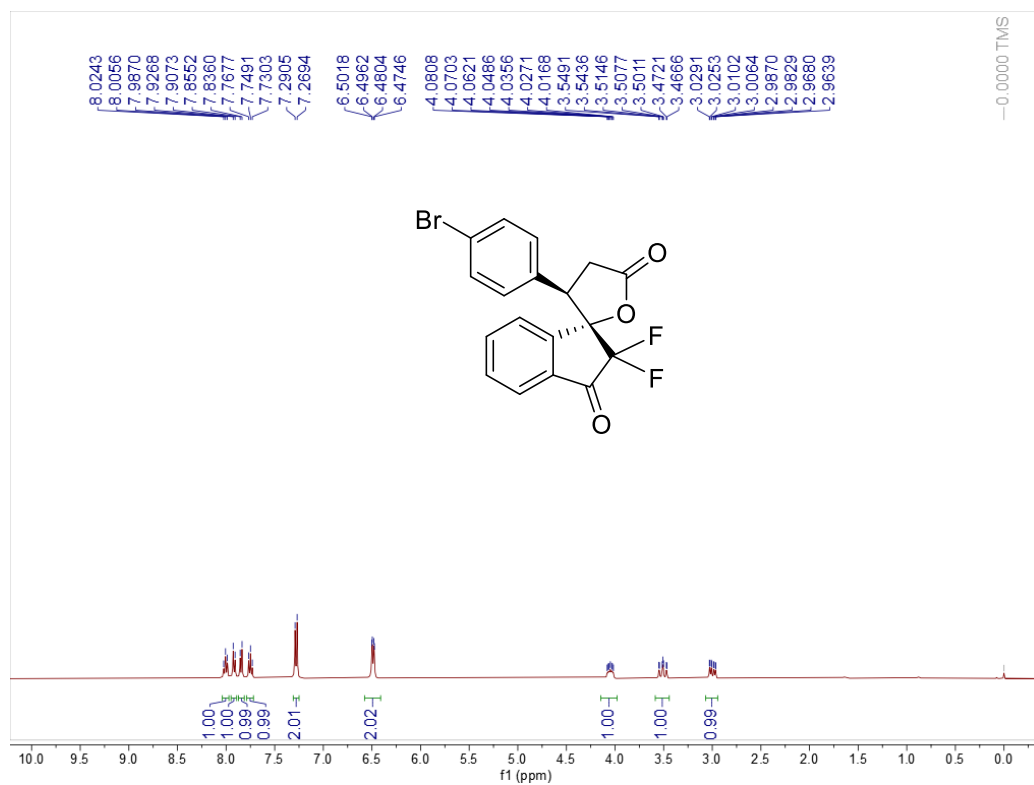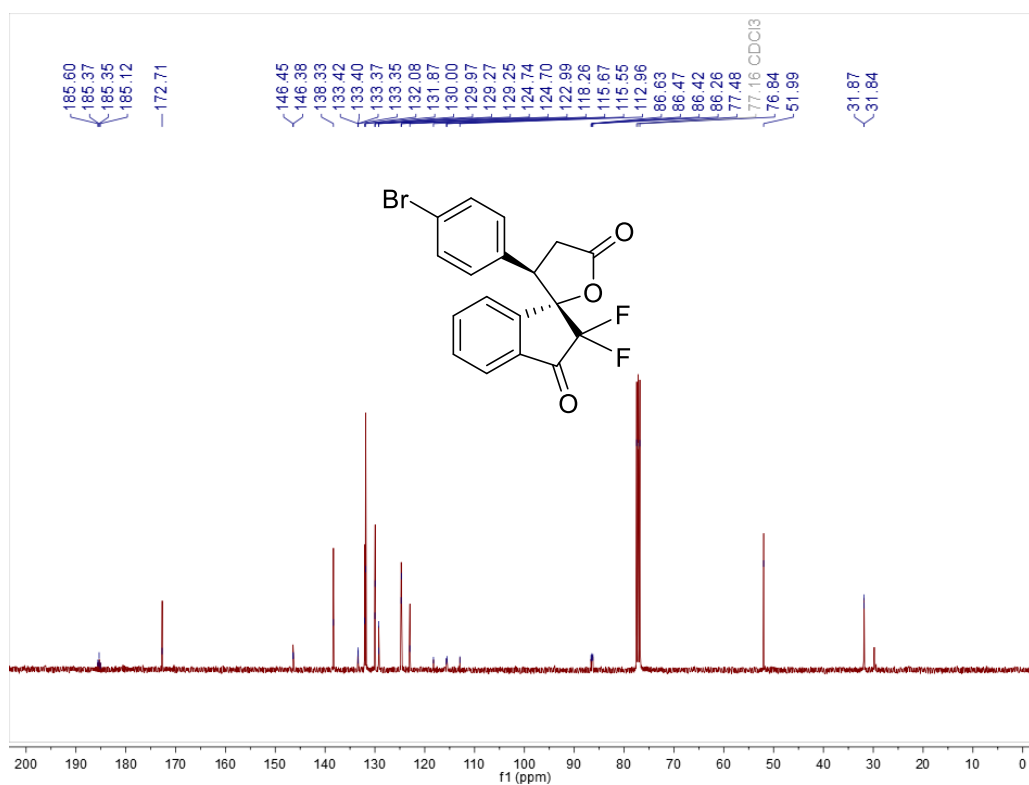

**3d**  $^{19}\text{F}$  NMR (376 MHz, Chloroform-*d*)

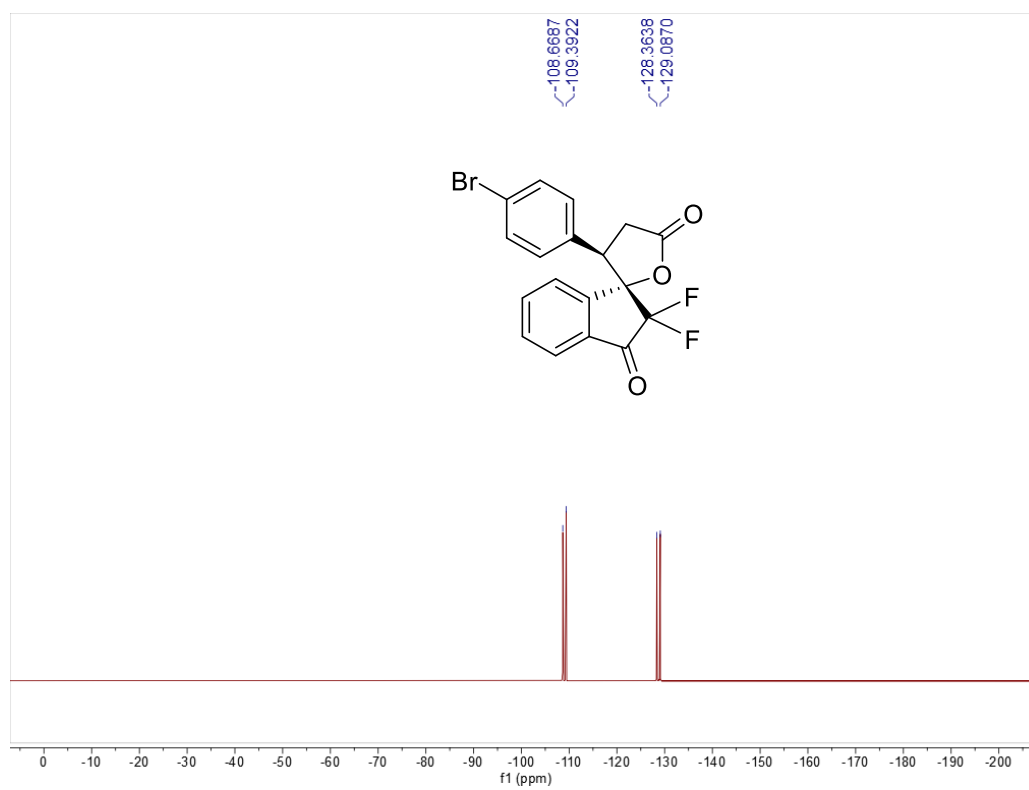

**3e**  $^1\text{H}$  NMR (400 MHz, Chloroform-*d*)/  $^{13}\text{C}$  {1H} NMR (101 MHz, Chloroform-*d*)

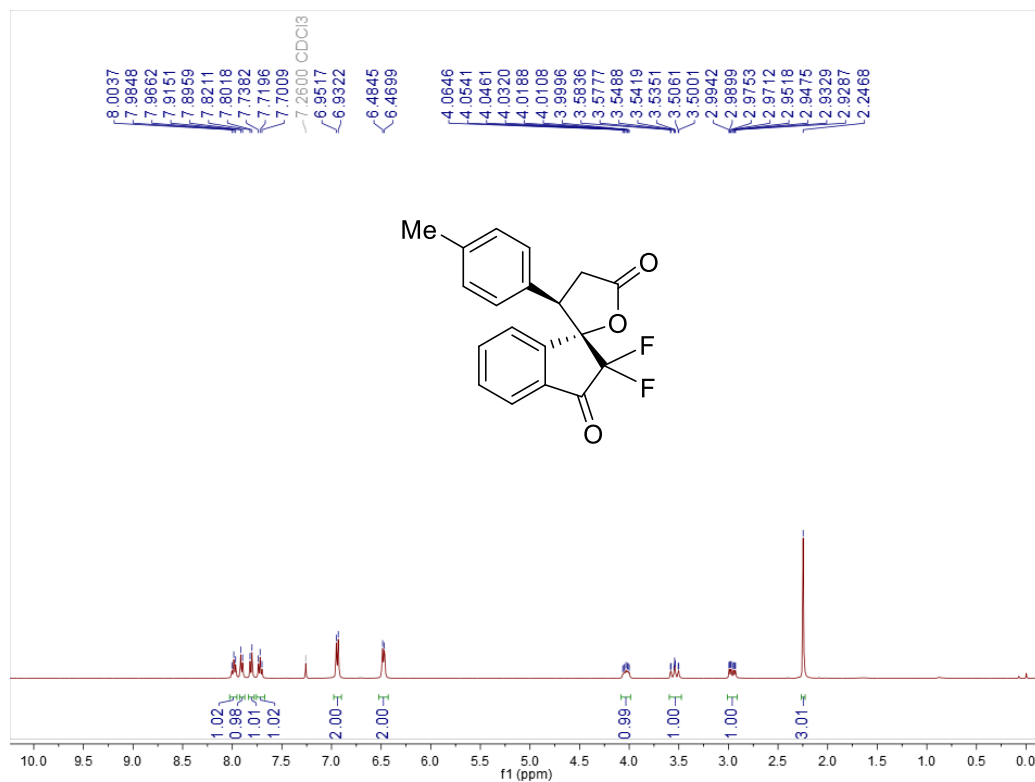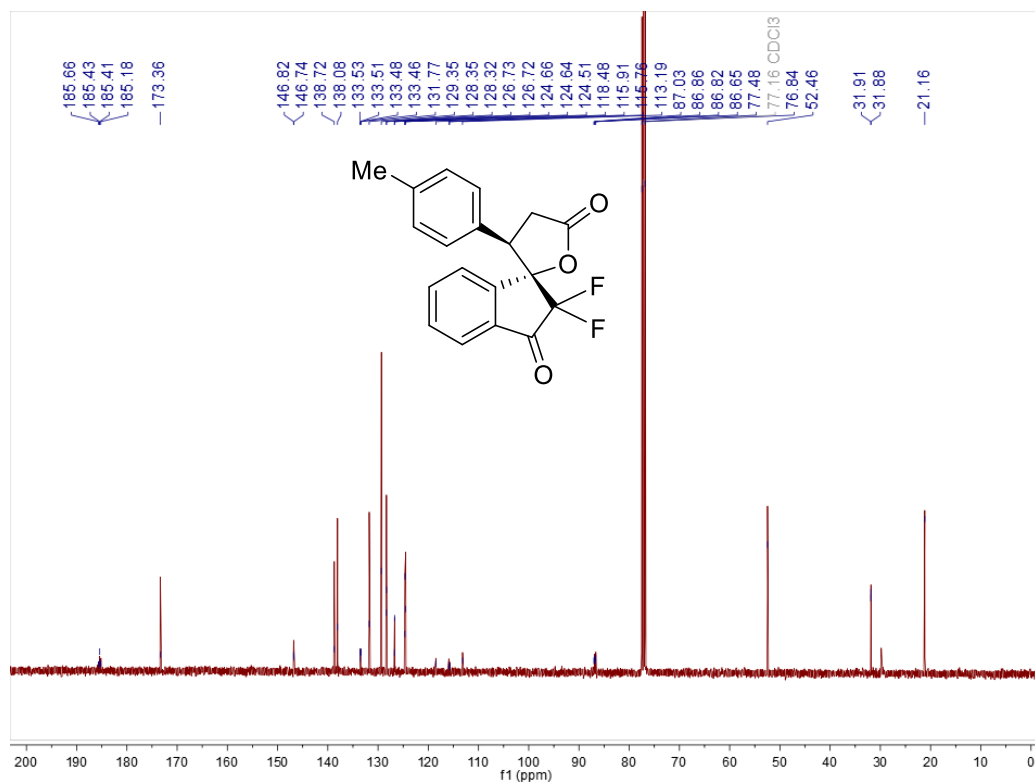

**3e**  $^{19}\text{F}$  NMR (376 MHz, Chloroform-*d*)

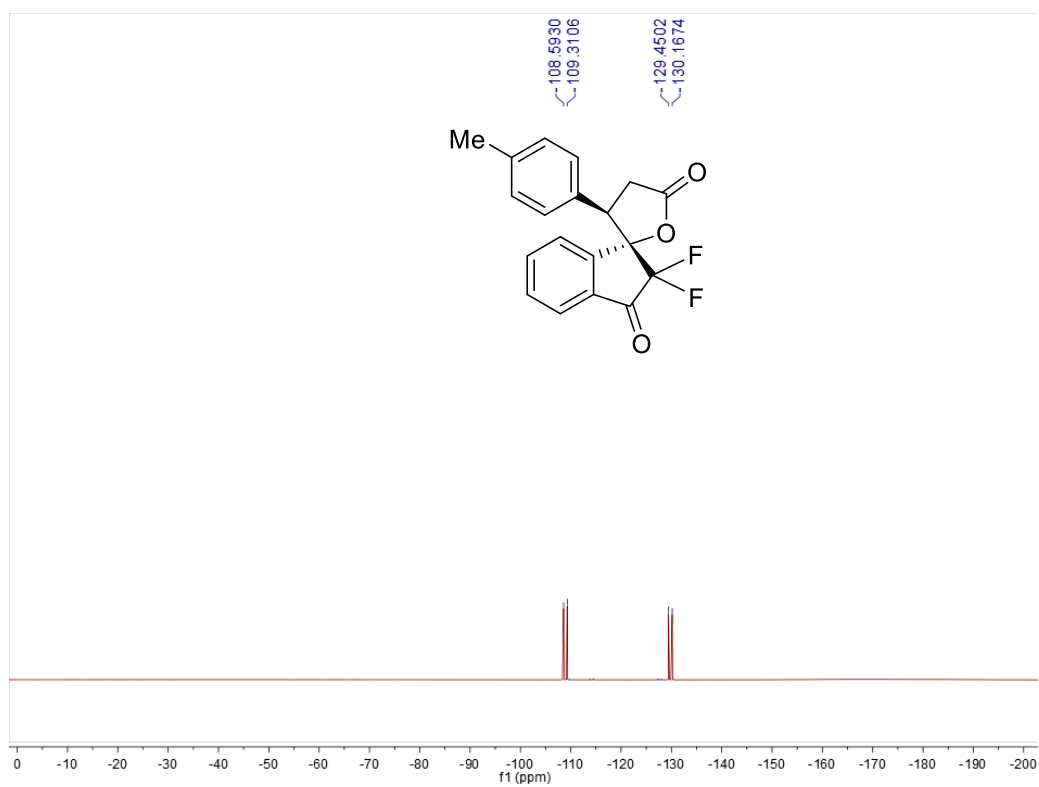

**3f**  $^1\text{H}$  NMR (400 MHz, Chloroform-*d*)/ $^{13}\text{C}$  {H} NMR (101 MHz, Chloroform-*d*)

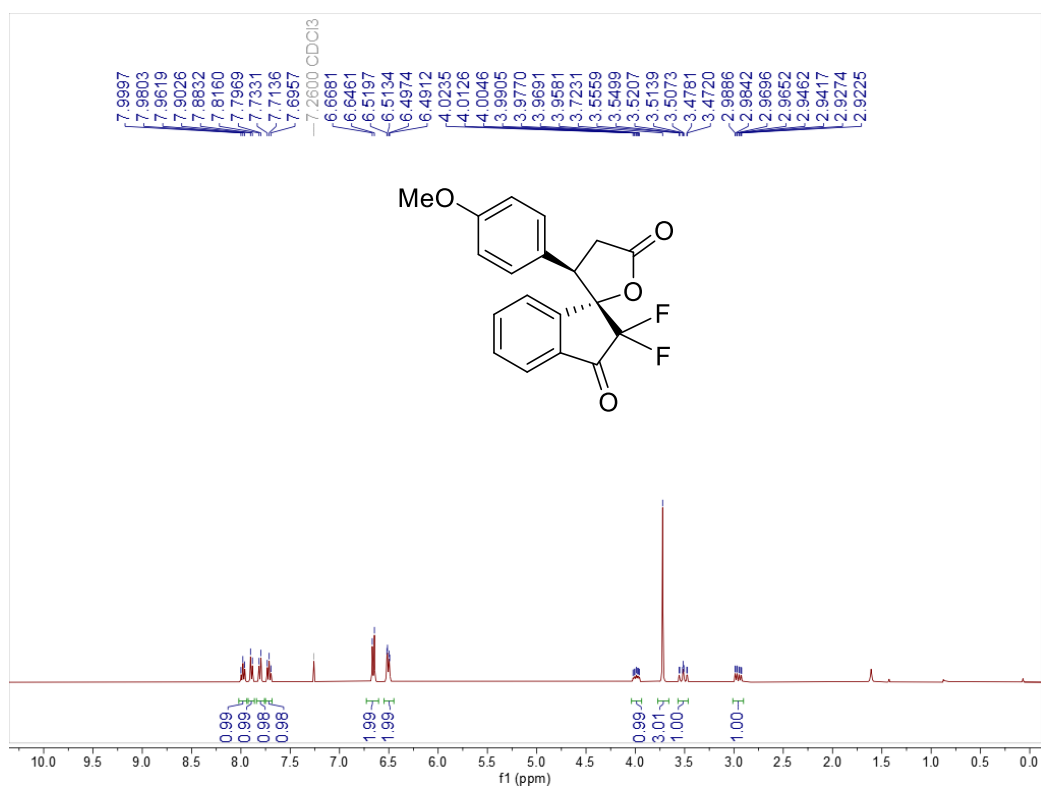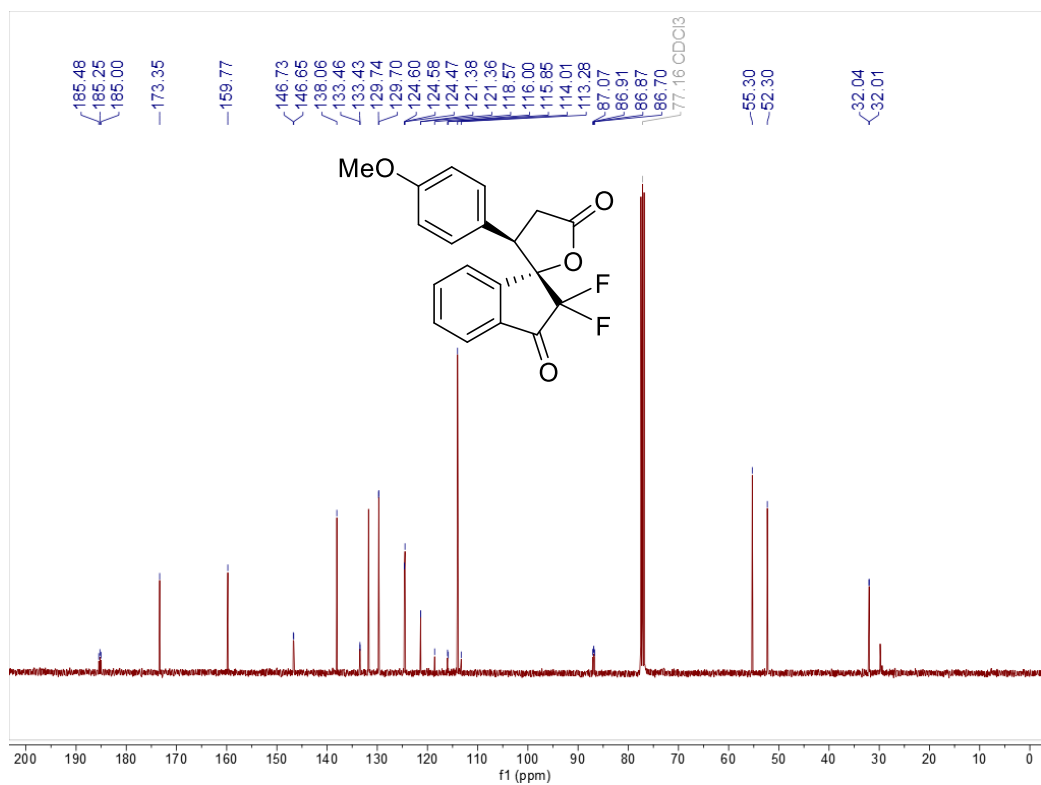

**3f**  $^{19}\text{F}$  NMR (376 MHz, Chloroform-*d*)

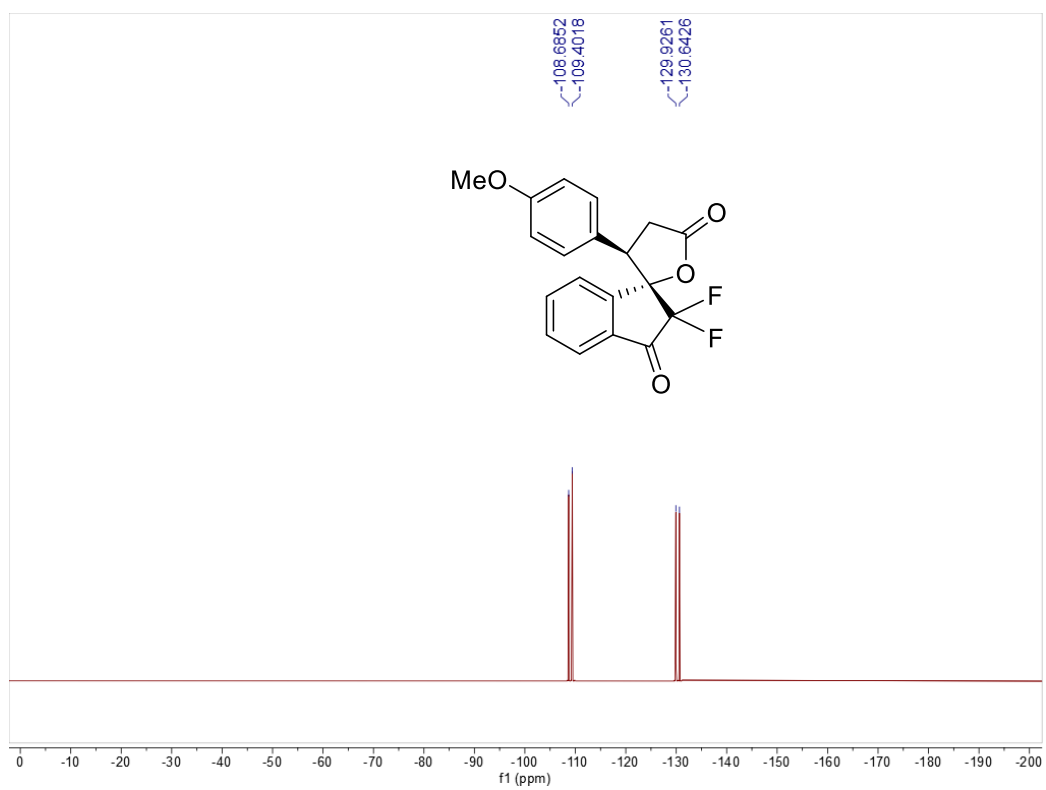



**3g**  $^1\text{H}$  NMR (400 MHz, Chloroform-*d*)/ $^{13}\text{C}$  {H} NMR (101 MHz, Chloroform-*d*)

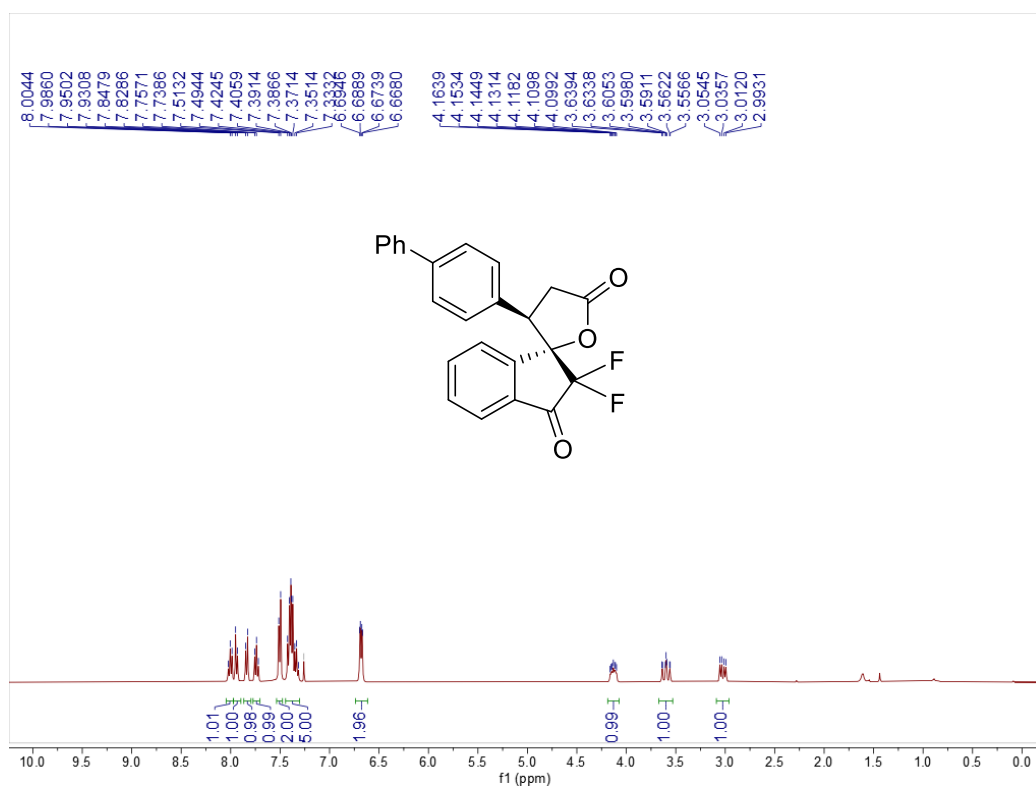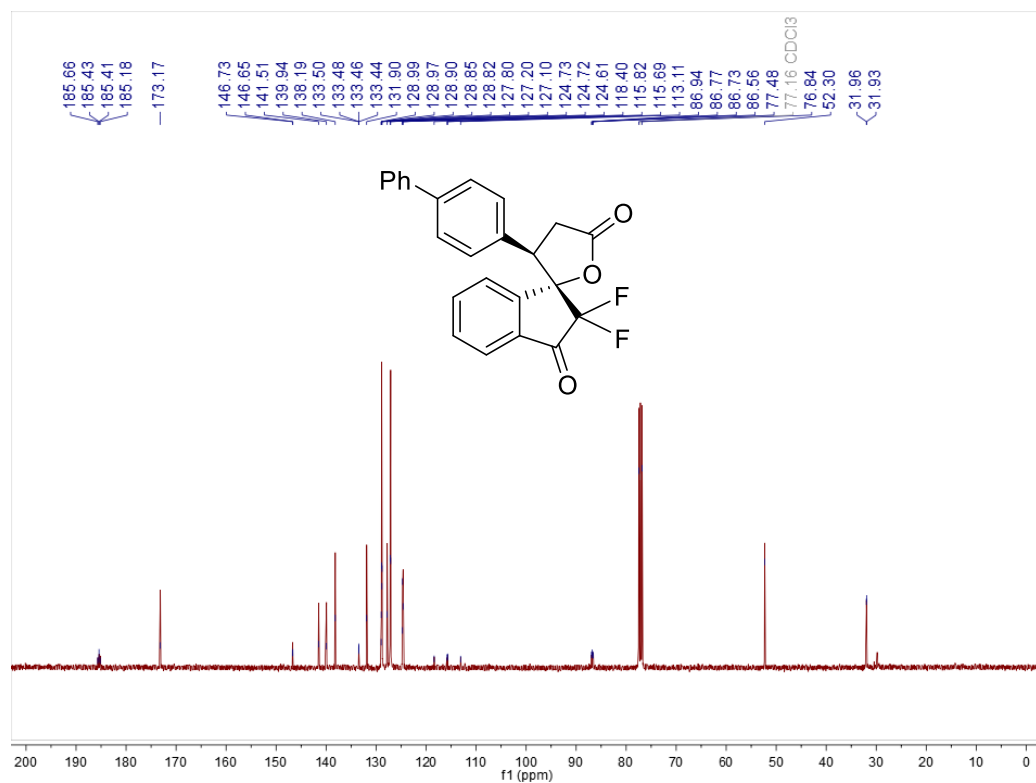

**3g**  $^{19}\text{F}$  NMR (376 MHz, Chloroform-*d*)

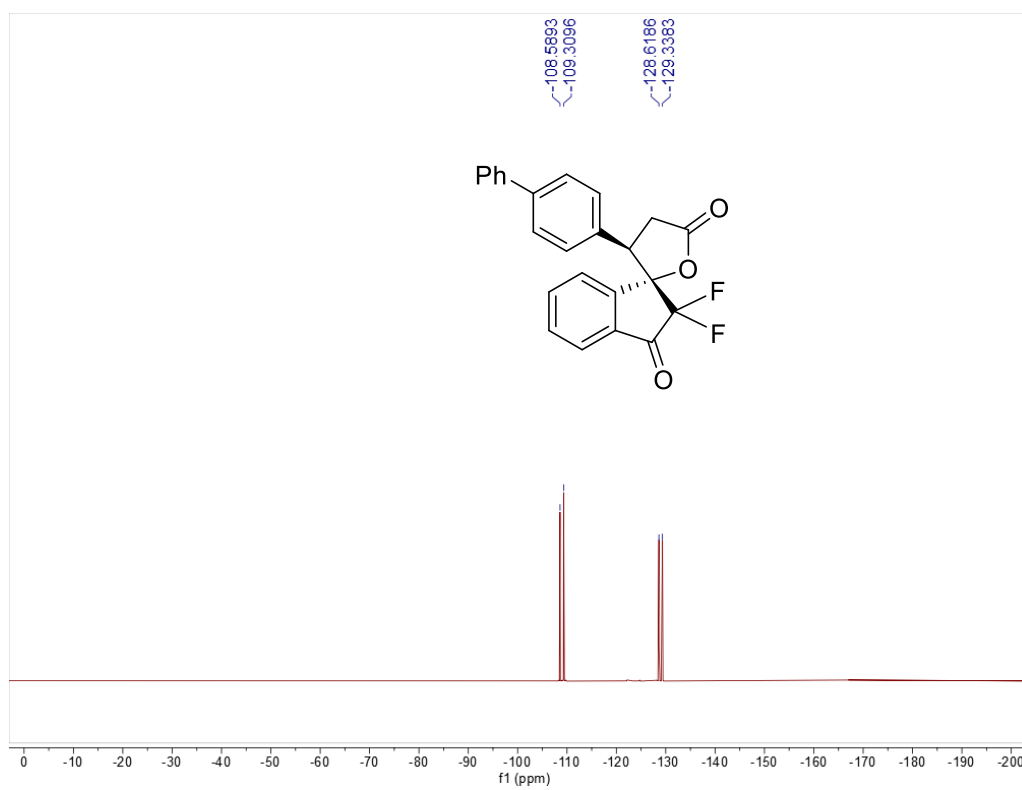

**3h**  $^1\text{H}$  NMR (300 MHz, Chloroform-*d*)/  $^{13}\text{C}$  {H} NMR (101 MHz, Chloroform-*d*)

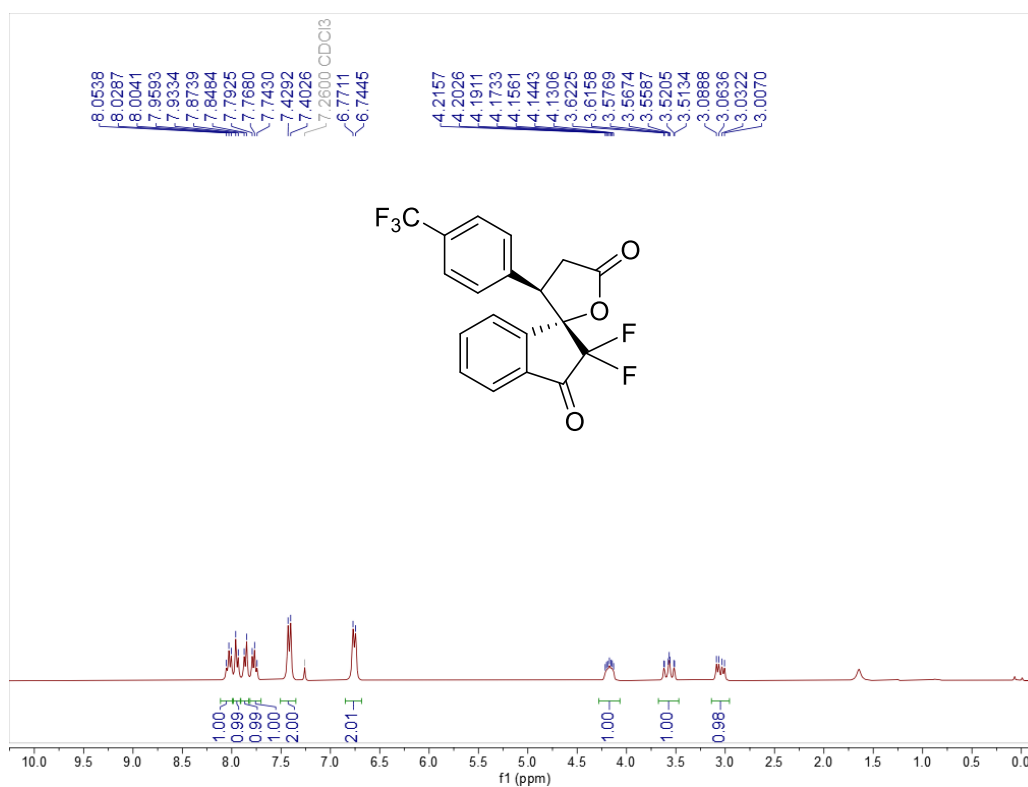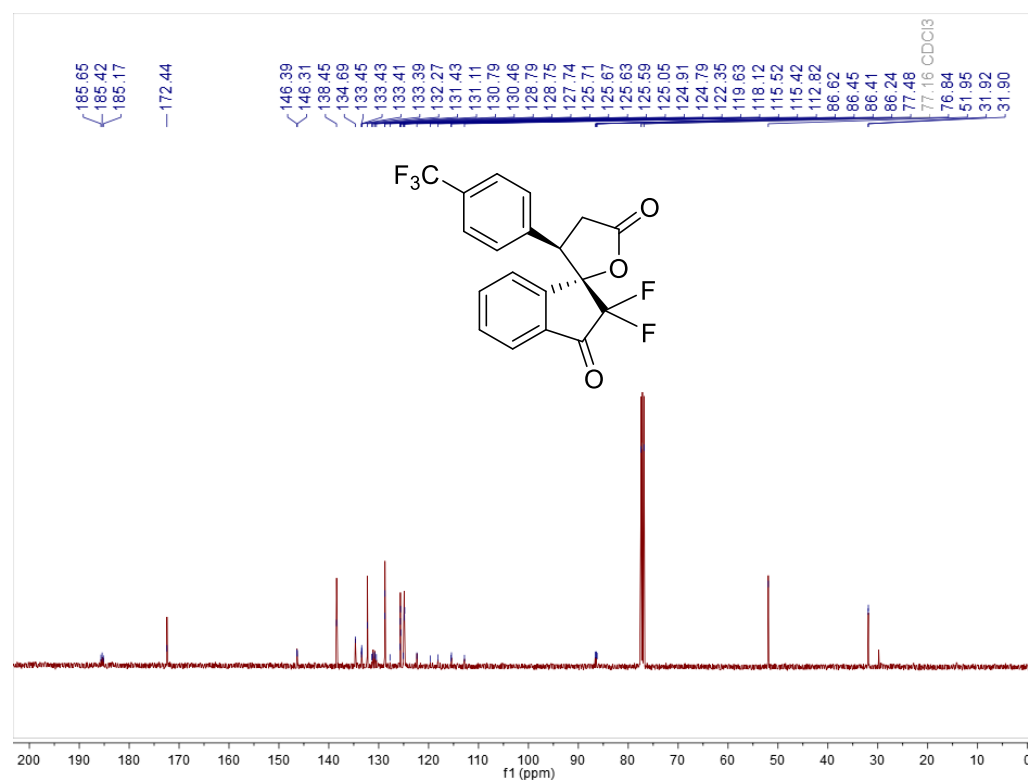

**3h**  $^{19}\text{F}$  NMR (282 MHz, Chloroform-*d*)

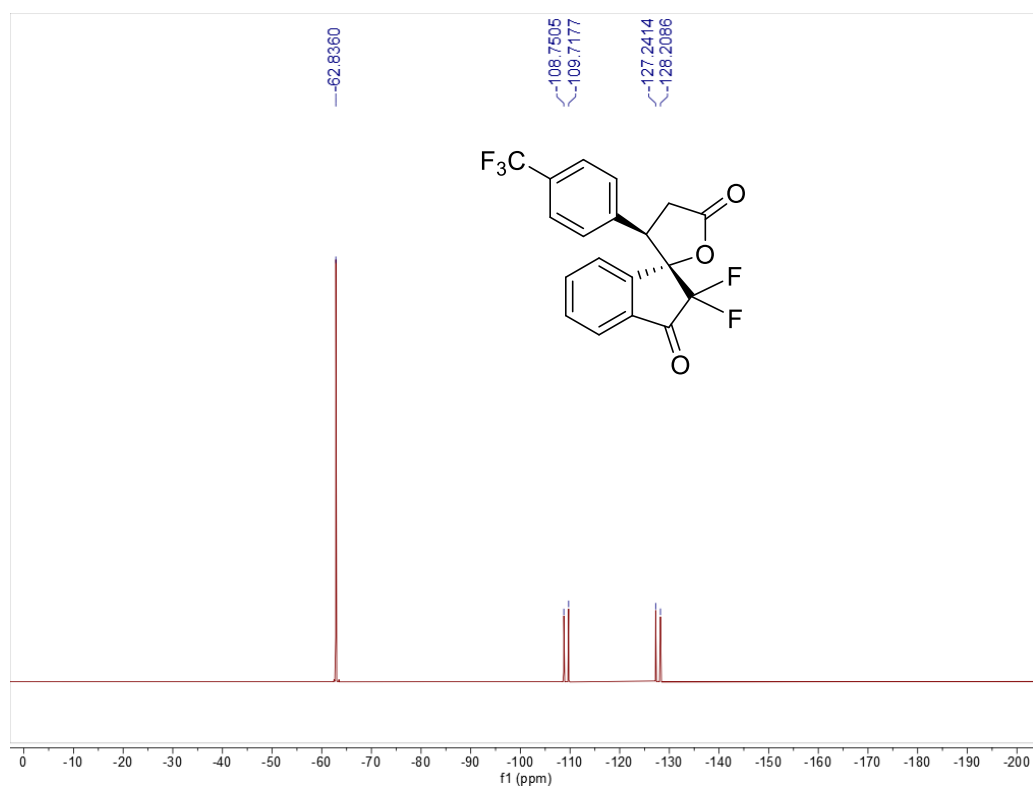

**3i**  $^1\text{H}$  NMR (300 MHz,  $\text{DMSO-}d_6$ )/ $^{13}\text{C}$  {H} NMR (101 MHz,  $\text{DMSO-}d_6$ )

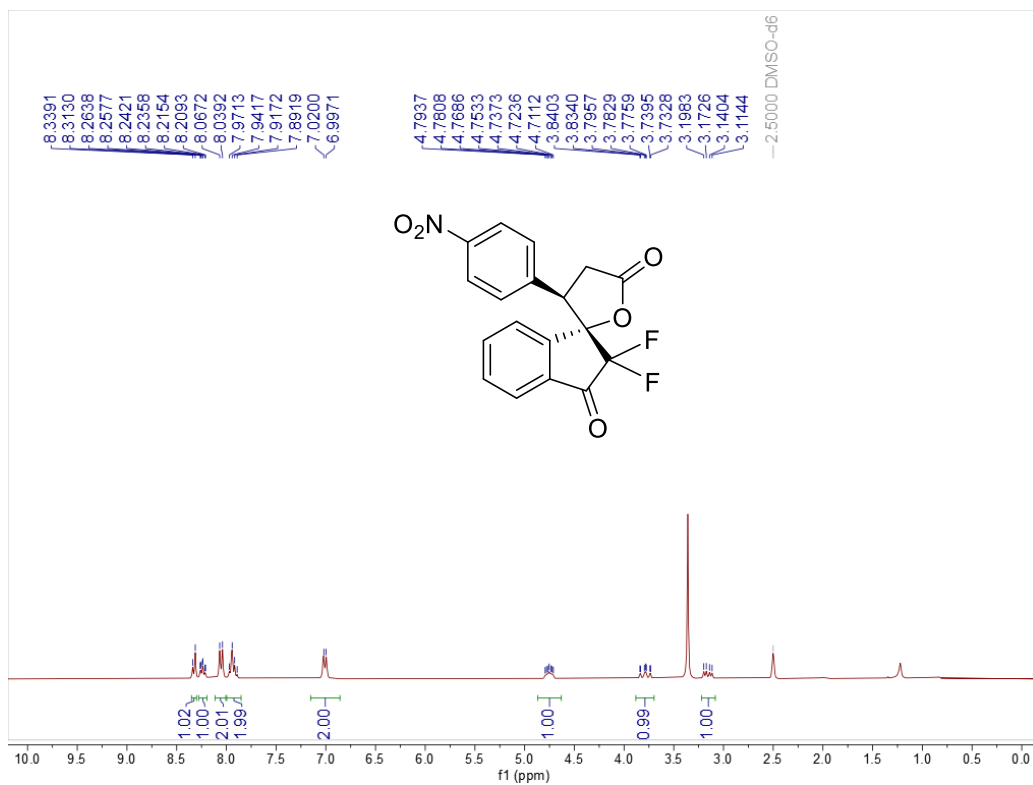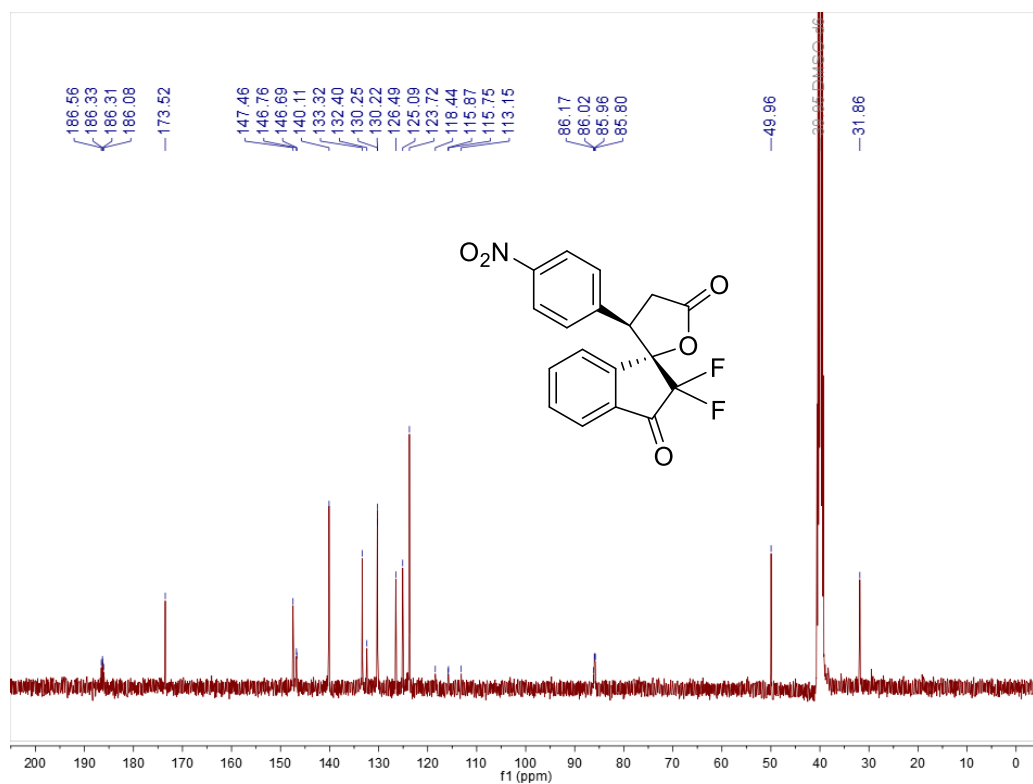

**3i**  $^{19}\text{F}$  NMR (282 MHz,  $\text{DMSO-}d_6$ )

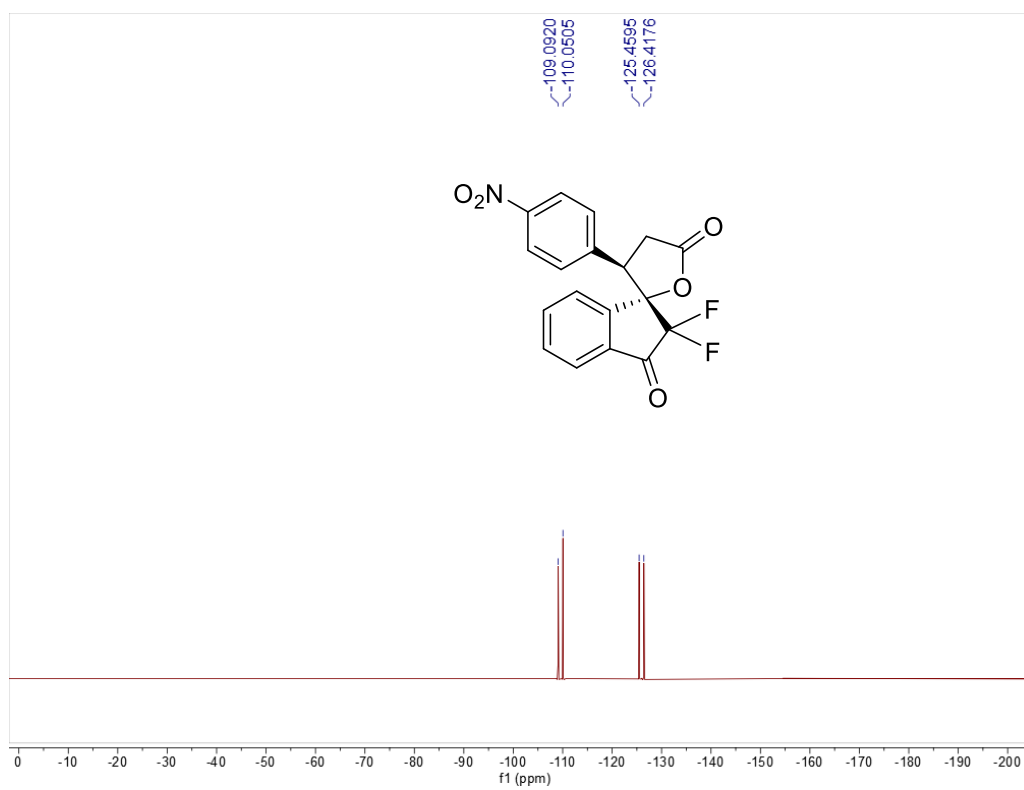

3j  $^1\text{H}$  NMR (400 MHz, Chloroform- $d$ )/ $^{13}\text{C}$  {H} NMR (101 MHz, Chloroform- $d$ )

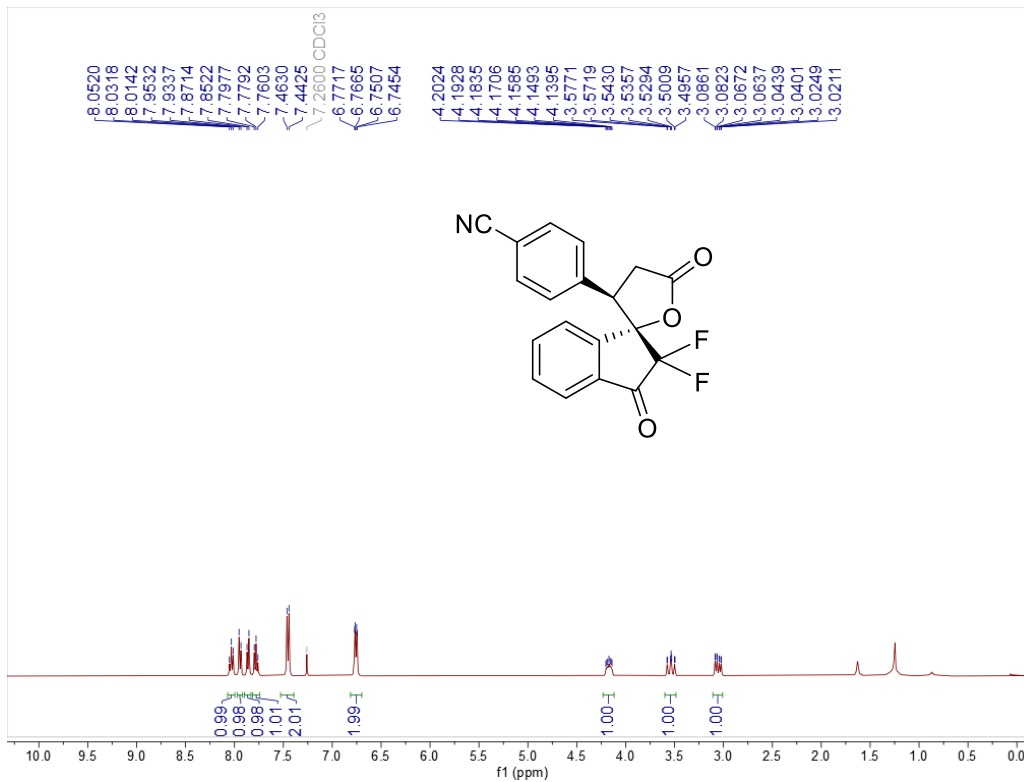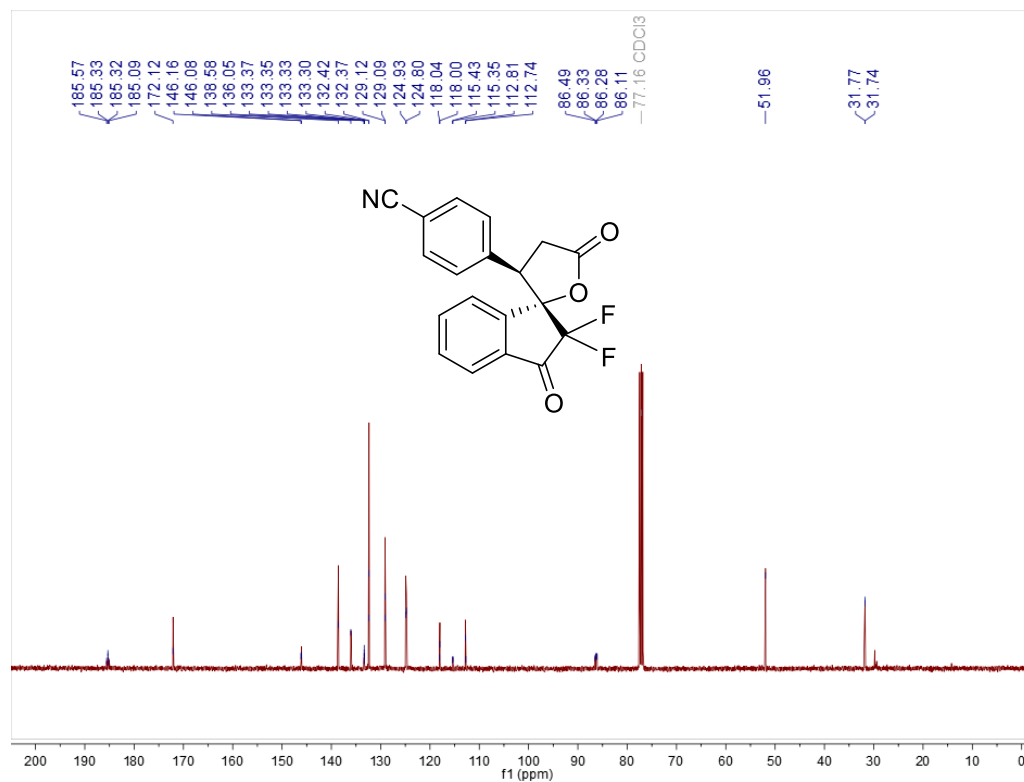

**3j**  $^{19}\text{F}$  NMR (376 MHz, Chloroform-*d*)

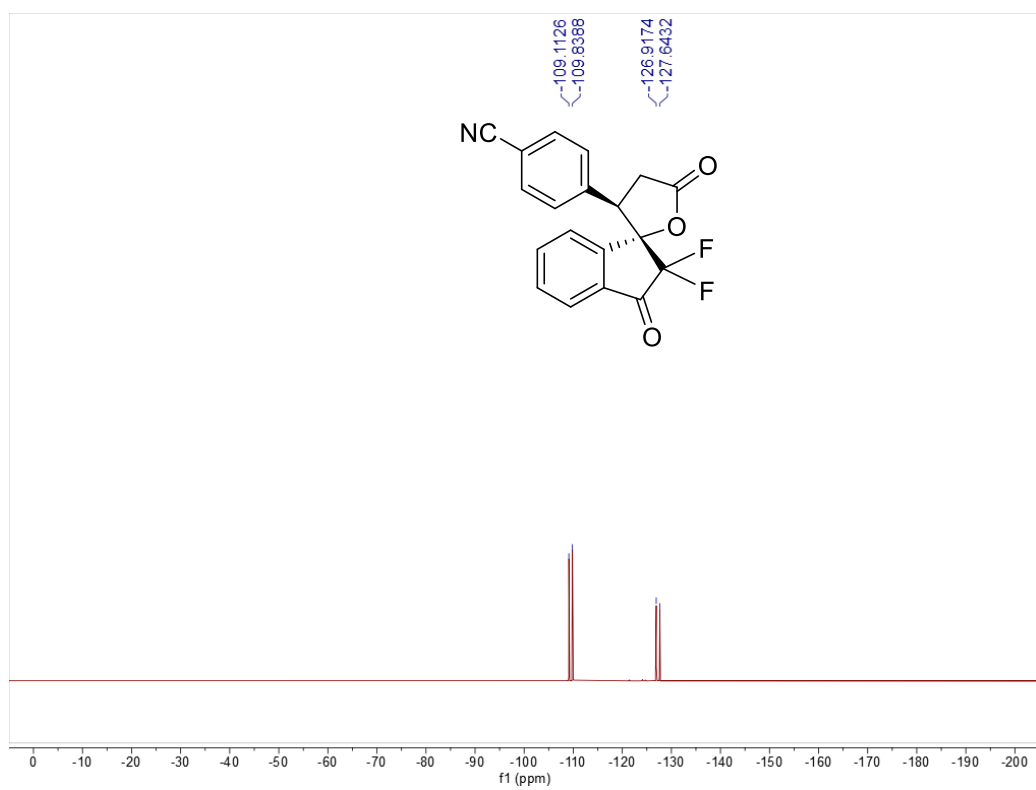



**3k**  $^1\text{H}$  NMR (400 MHz, Chloroform-*d*)/ $^{13}\text{C}$  {H} NMR (101 MHz, Chloroform-*d*)

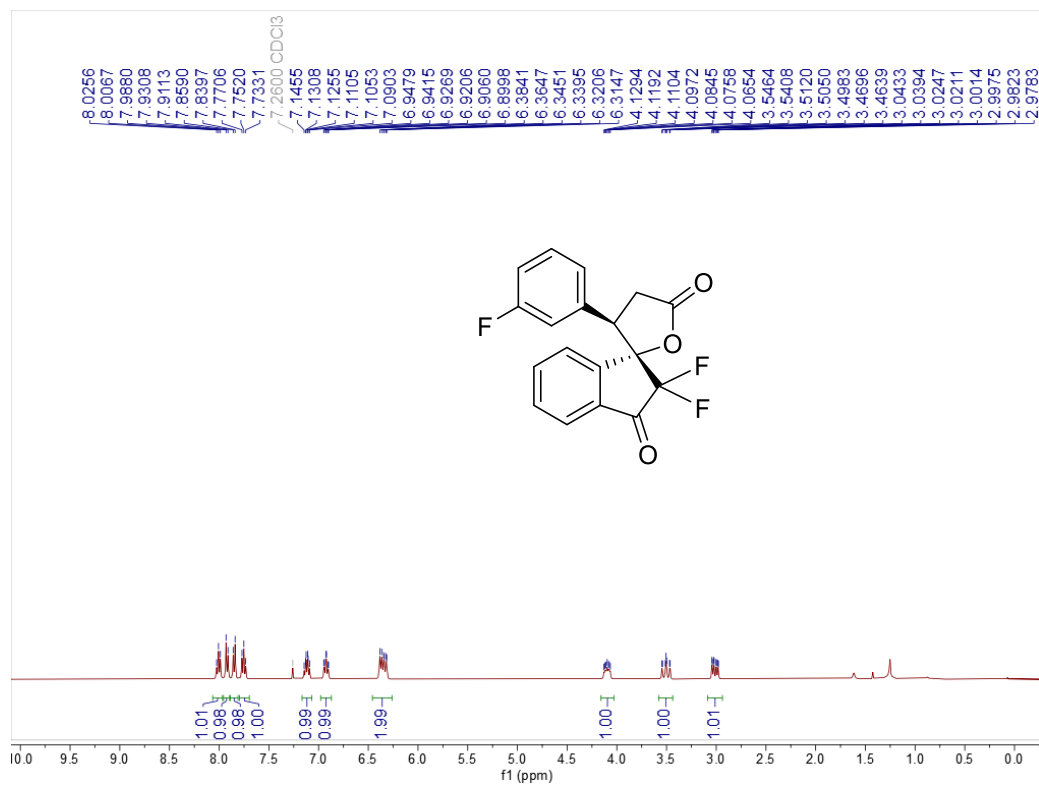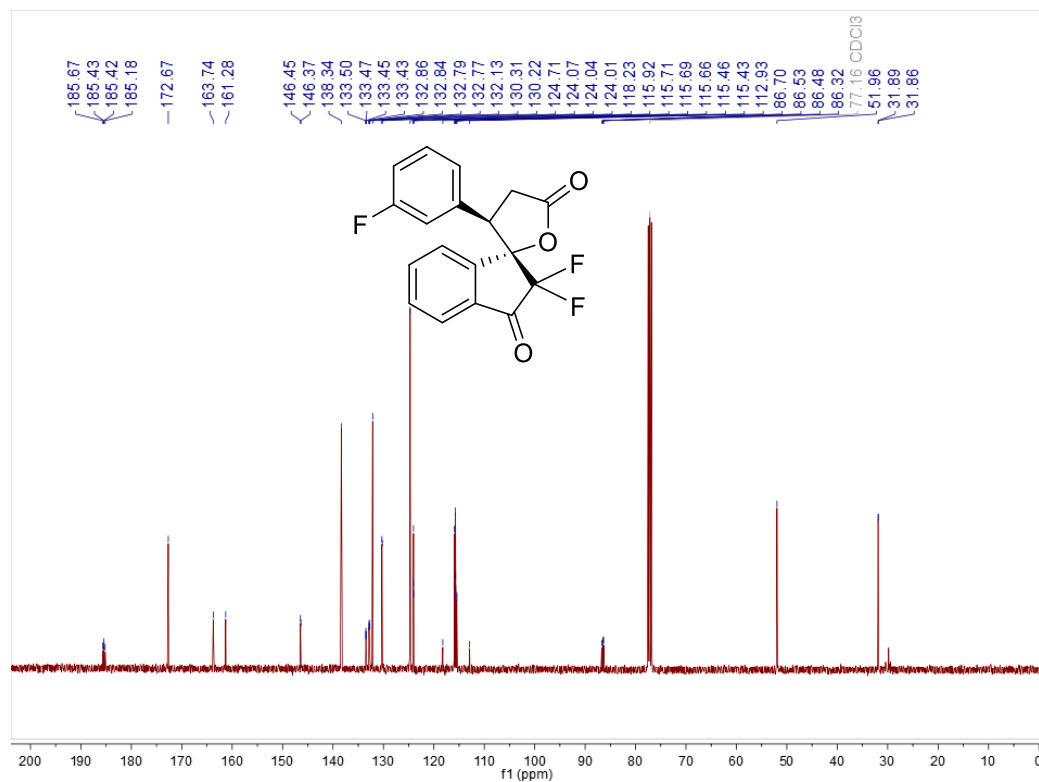

**3k**  $^{19}\text{F}$  NMR (376 MHz, Chloroform-*d*)

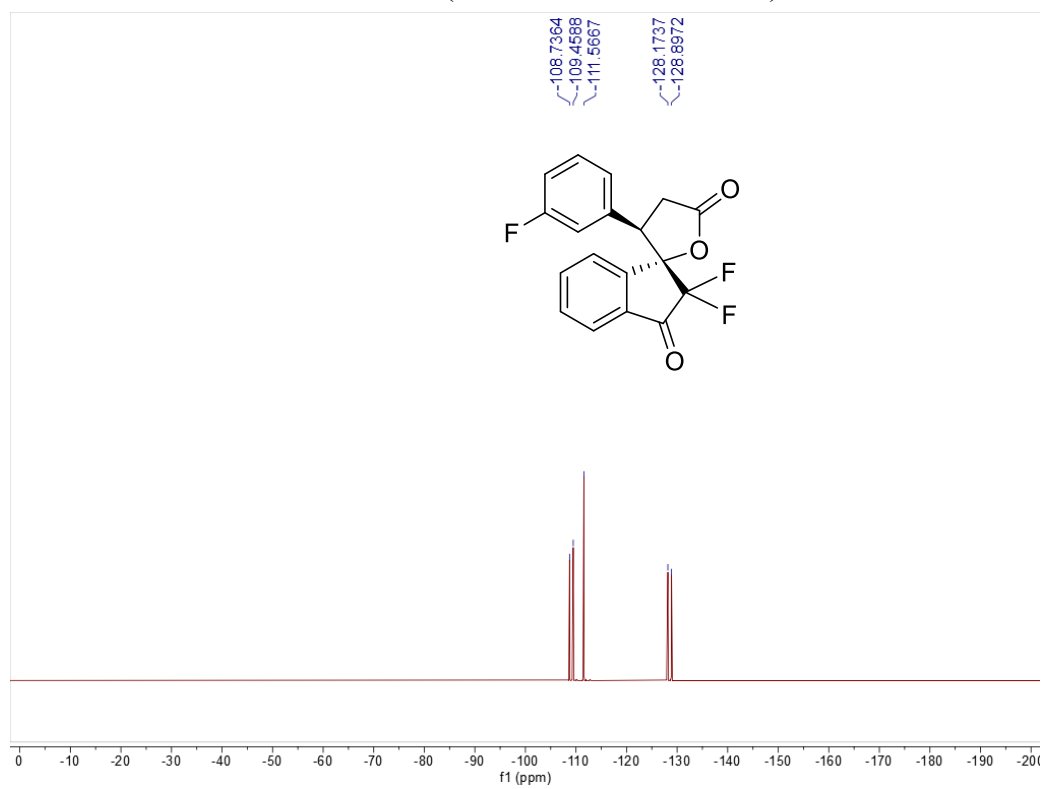

**31**  $^1\text{H}$  NMR (300 MHz, Chloroform-*d*)/ $^{13}\text{C}$  {1H} NMR (101 MHz, Chloroform-*d*)

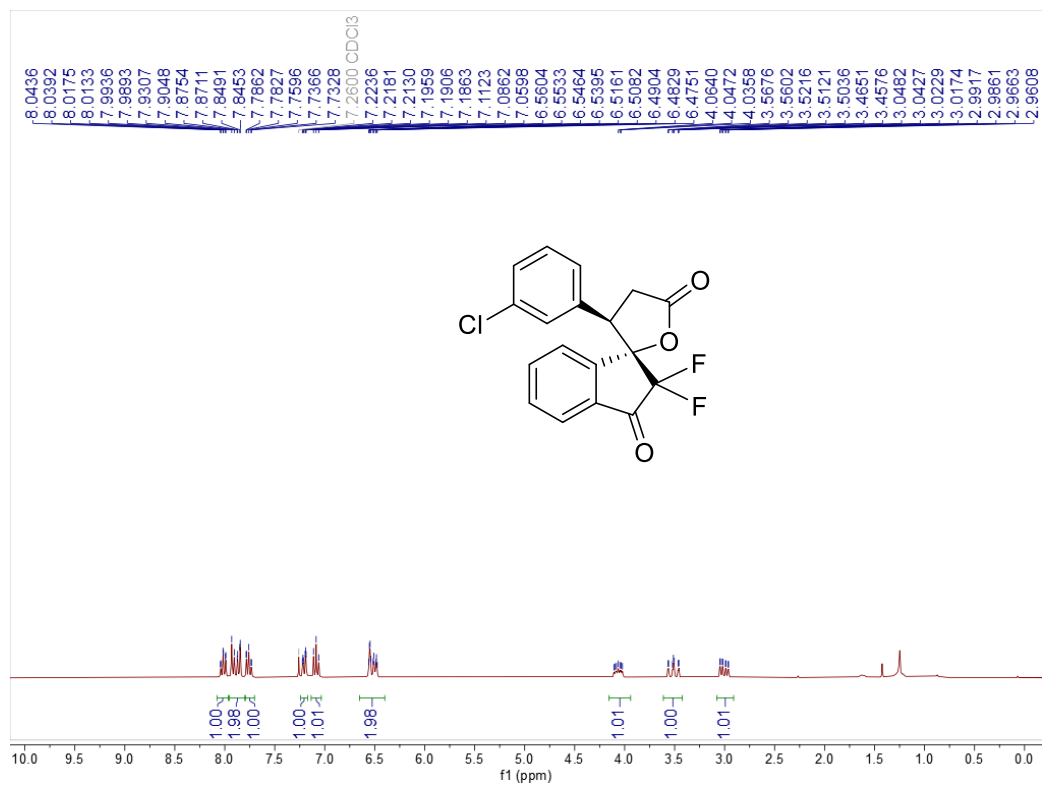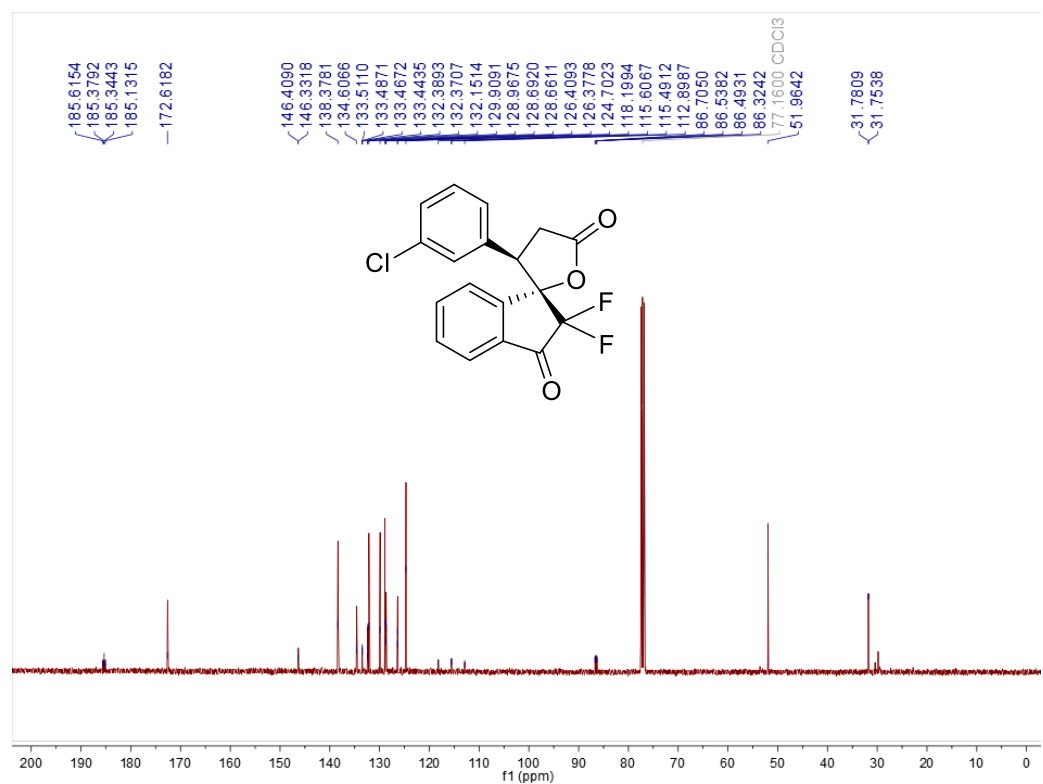

**31**  $^{19}\text{F}$  NMR (282 MHz, Chloroform-*d*)

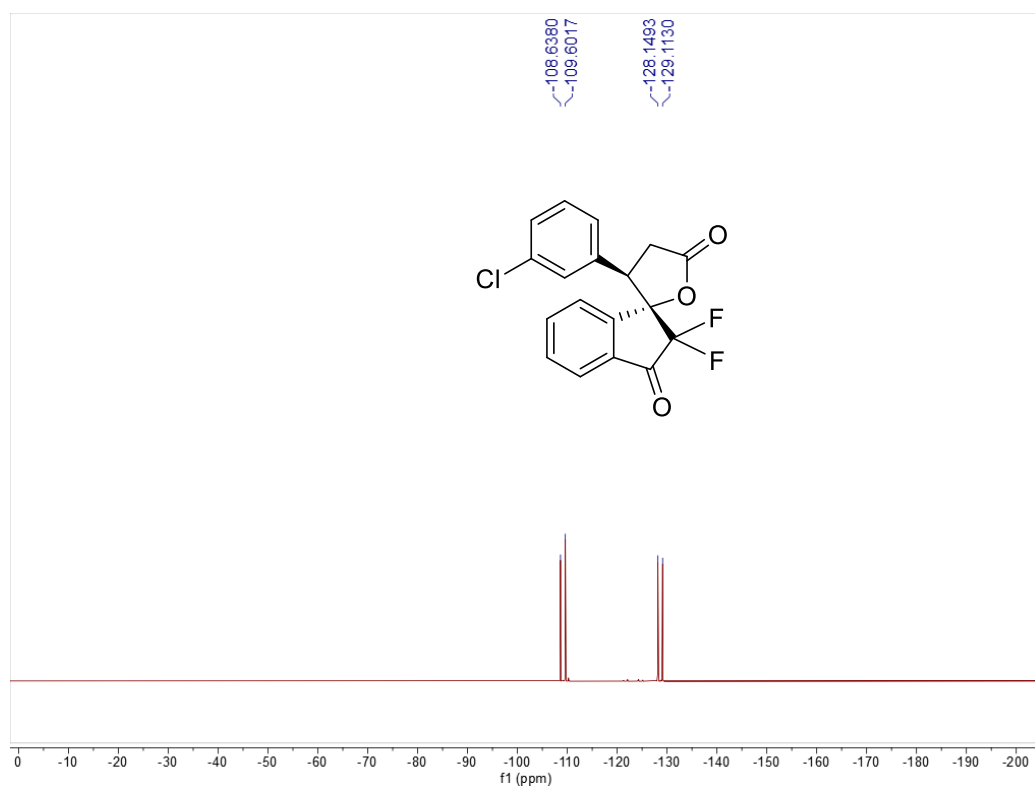

**3m**  $^1\text{H}$  NMR (400 MHz, Chloroform-*d*)/ $^{13}\text{C}$  {H} NMR (101 MHz, Chloroform-*d*)

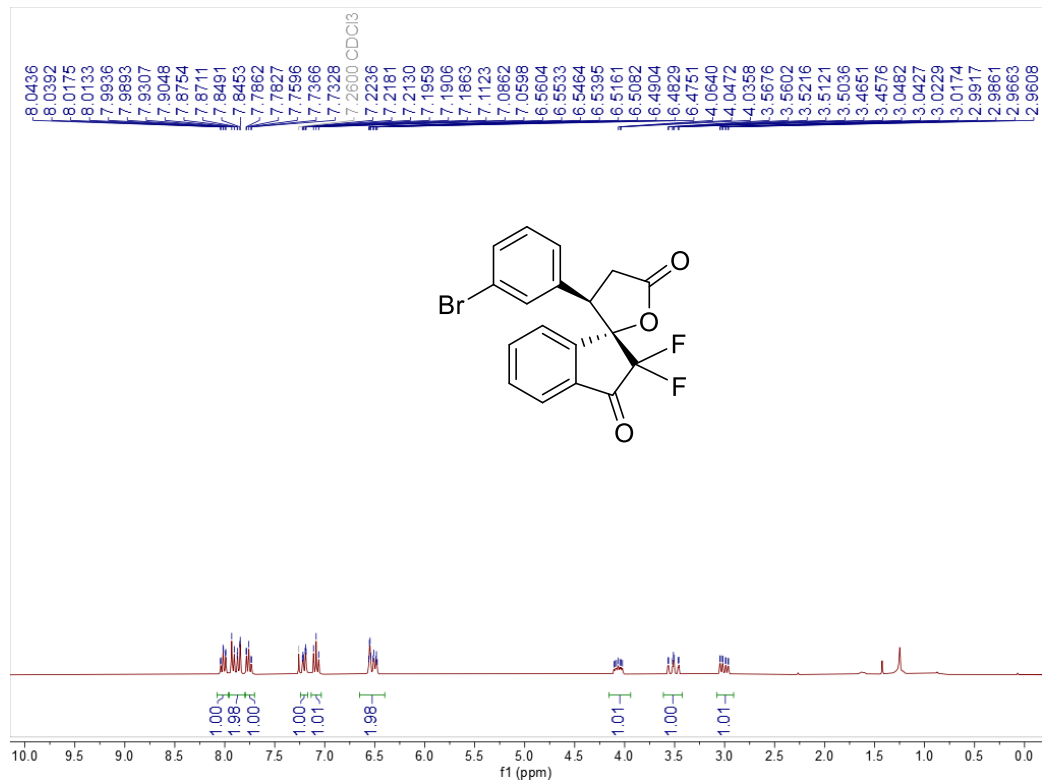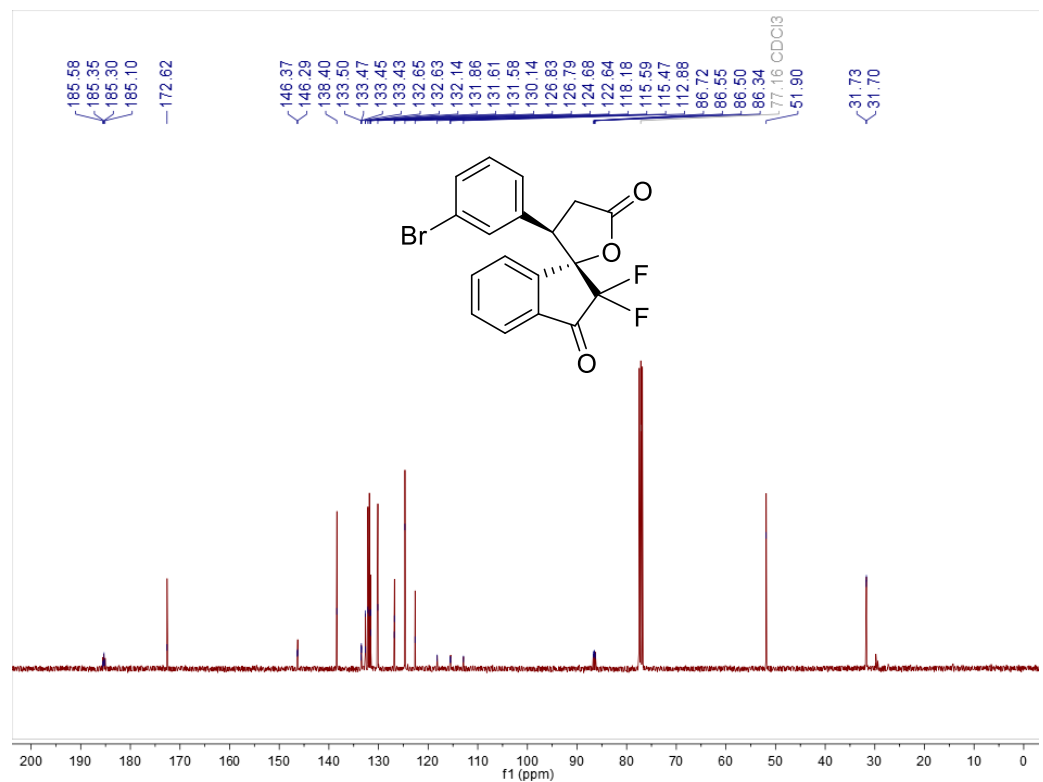

**3m**  $^{19}\text{F}$  NMR (376 MHz, Chloroform-*d*)

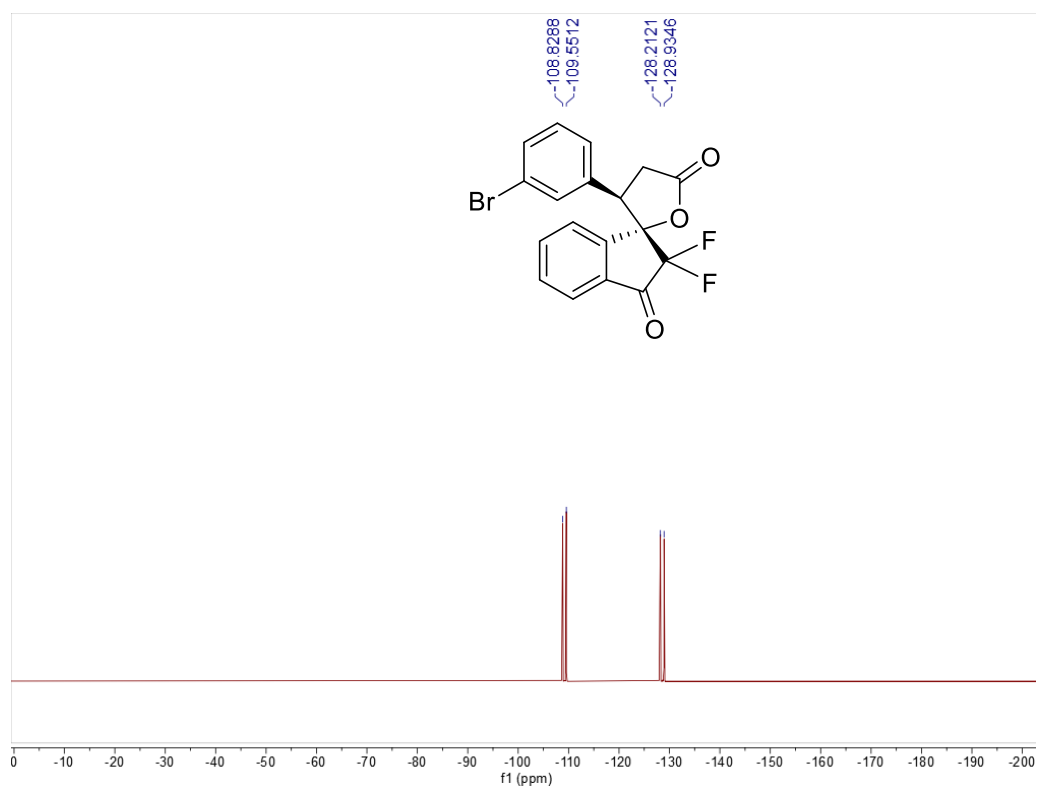

**3n**  $^1\text{H}$  NMR (400 MHz, Chloroform- $d$ )/ $^{13}\text{C}$  {H} NMR (101 MHz, Chloroform- $d$ )

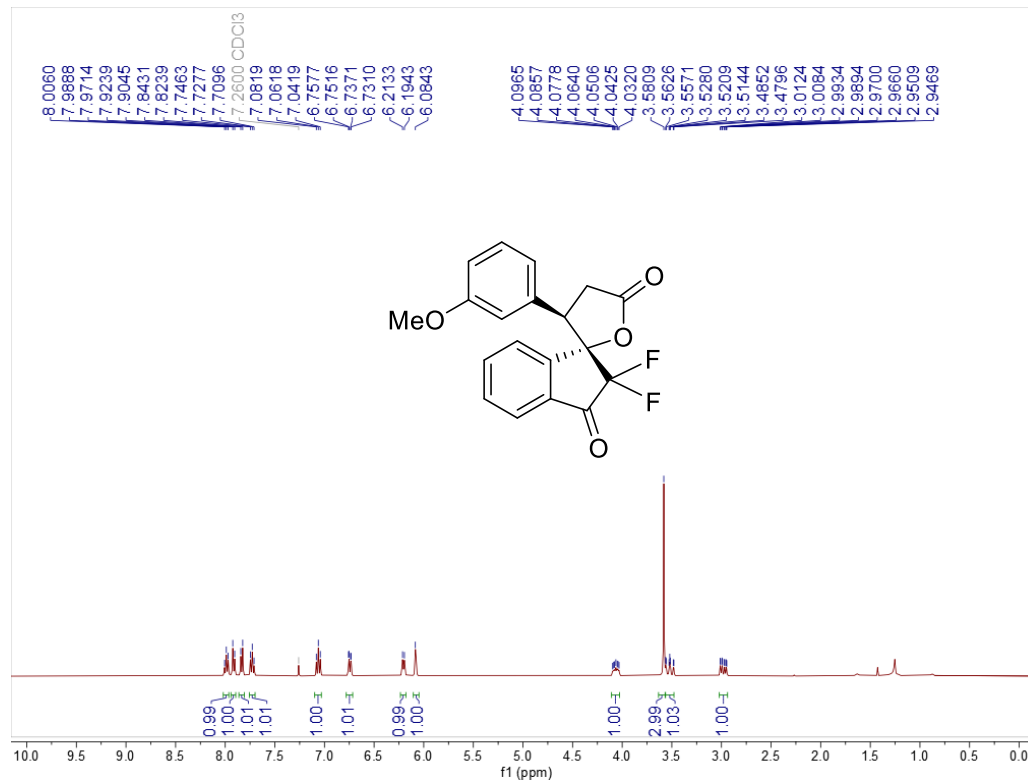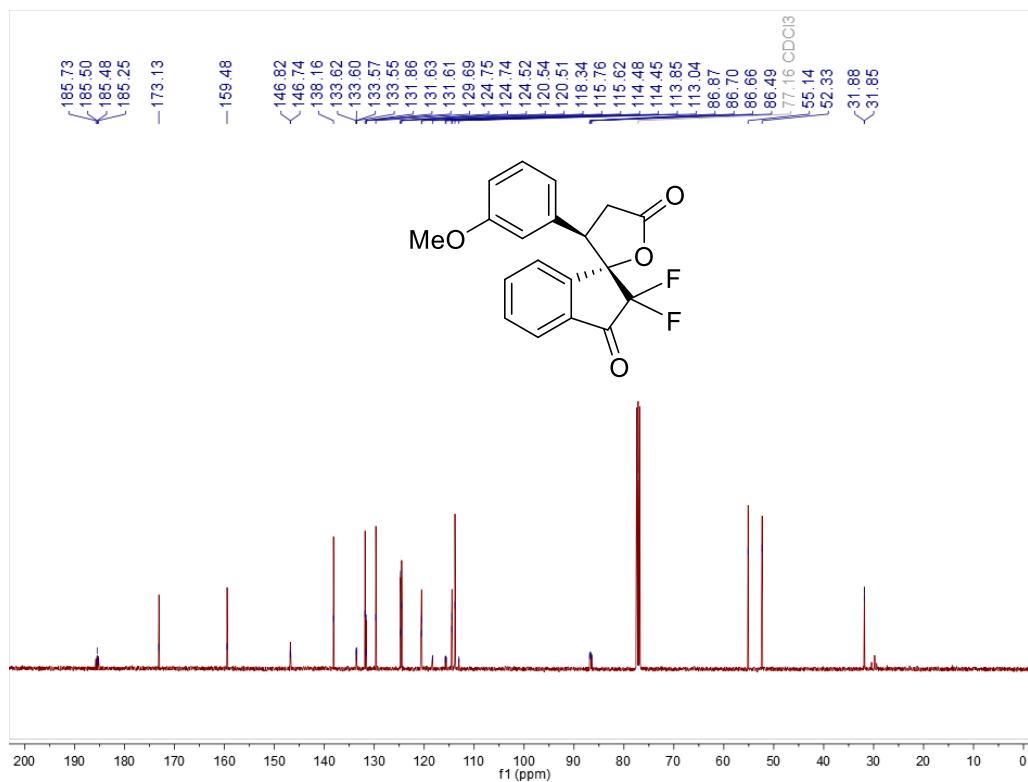

**3n**  $^{19}\text{F}$  NMR (376 MHz, Chloroform-*d*)

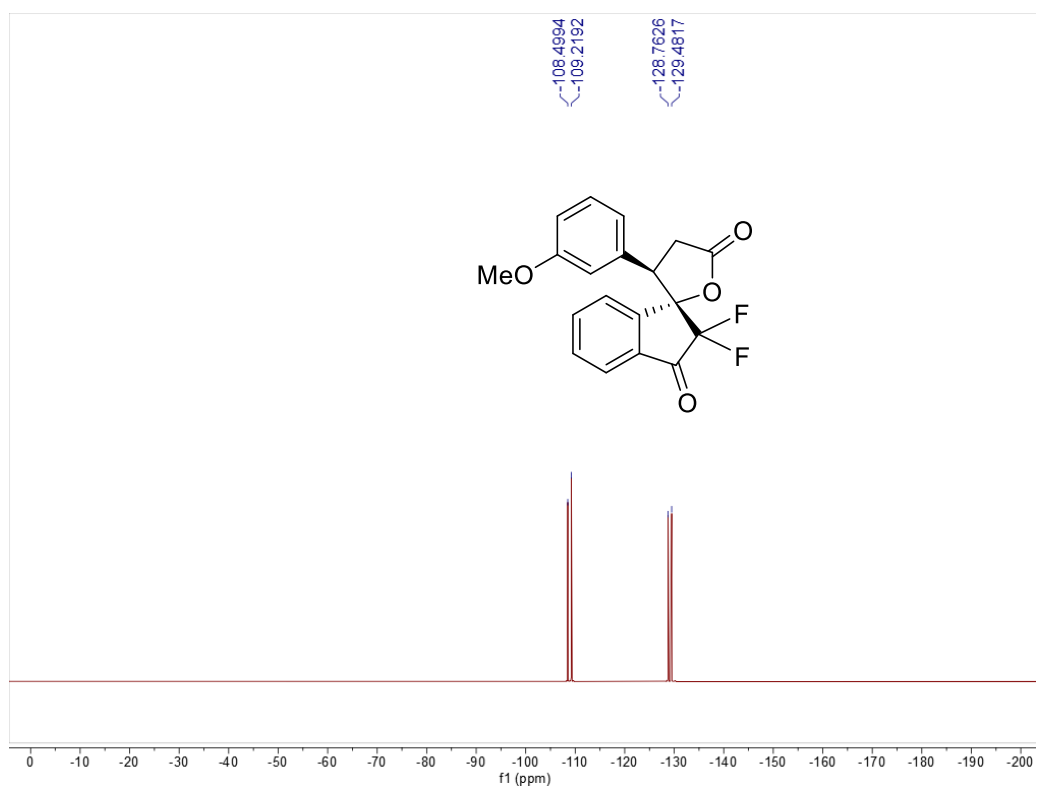



**3o**  $^1\text{H}$  NMR (400 MHz, Chloroform-*d*)/ $^{13}\text{C}$  {H} NMR (101 MHz, Chloroform-*d*)

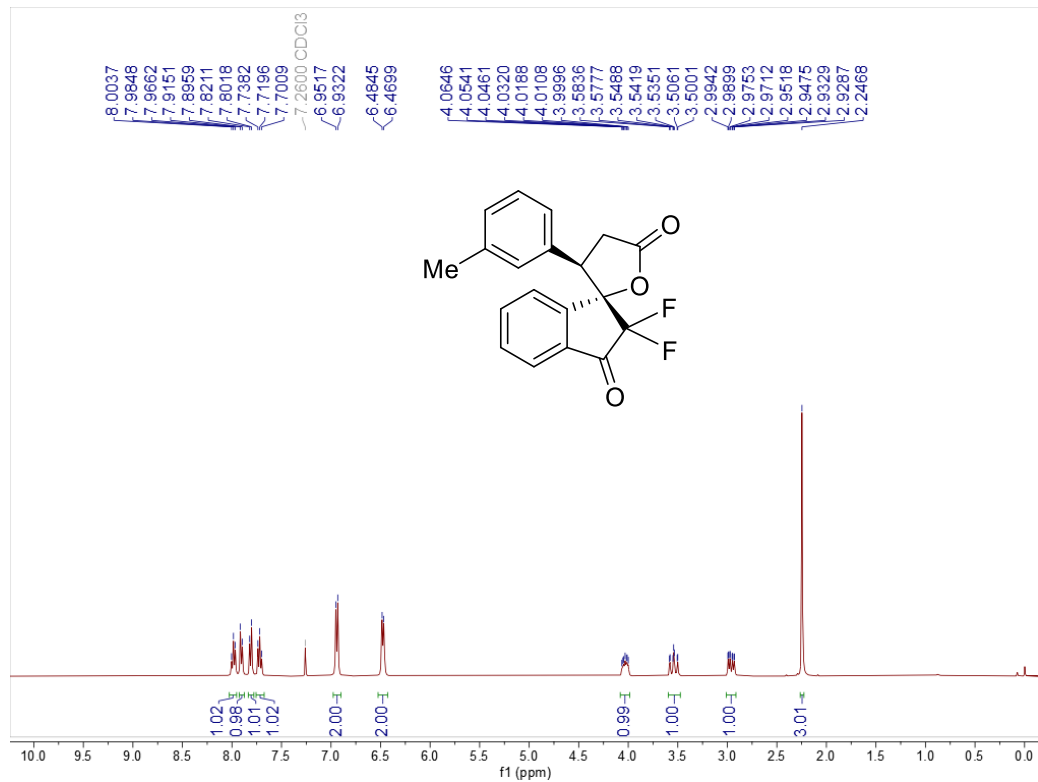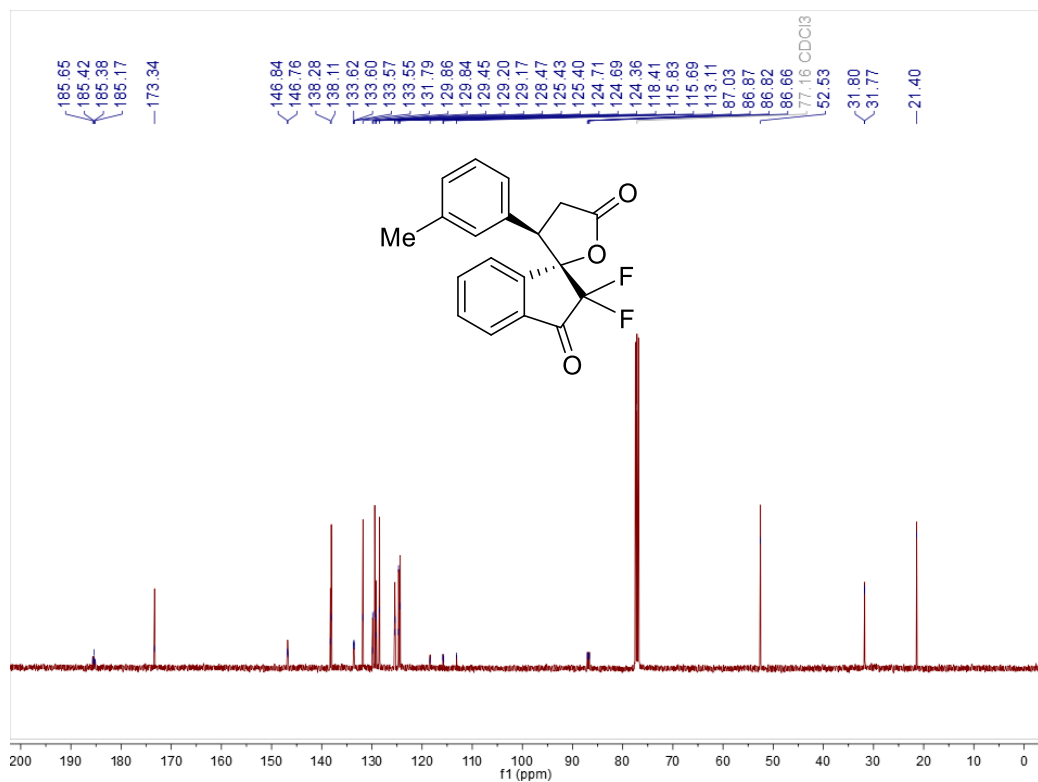

**3o**  $^{19}\text{F}$  NMR (376 MHz, Chloroform-*d*)

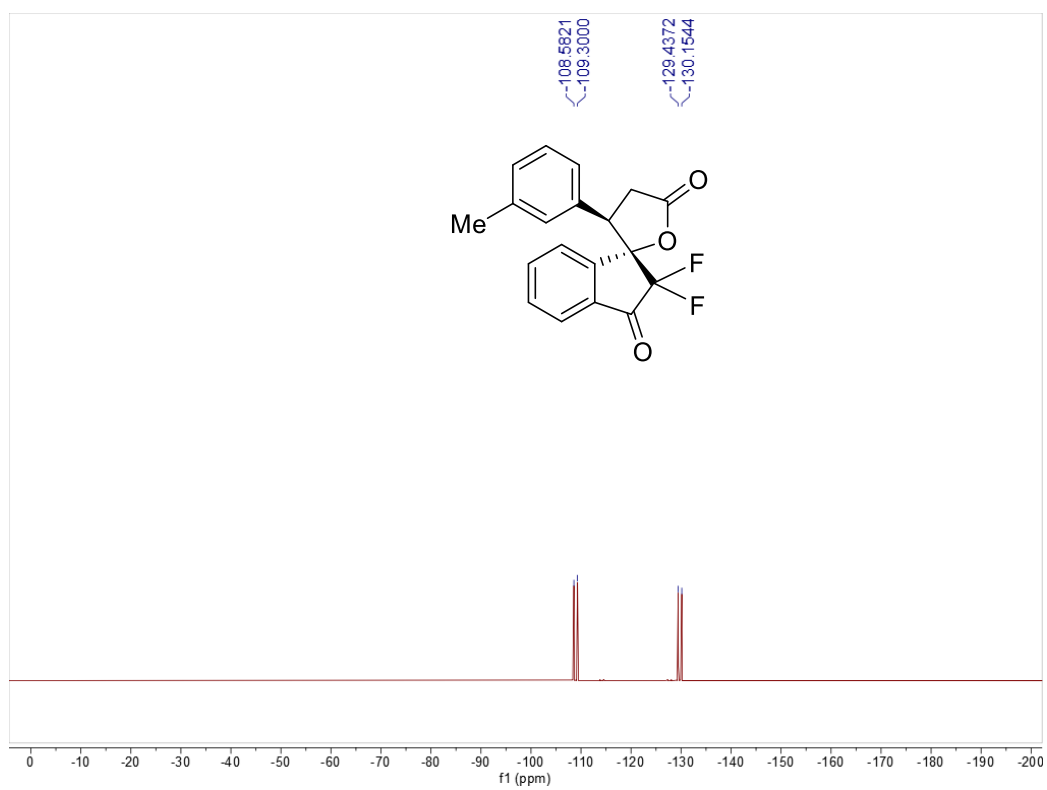

**3p**  $^1\text{H}$  NMR (400 MHz, Chloroform- $d$ )/ $^{13}\text{C}$  {H} NMR (101 MHz, Chloroform- $d$ )

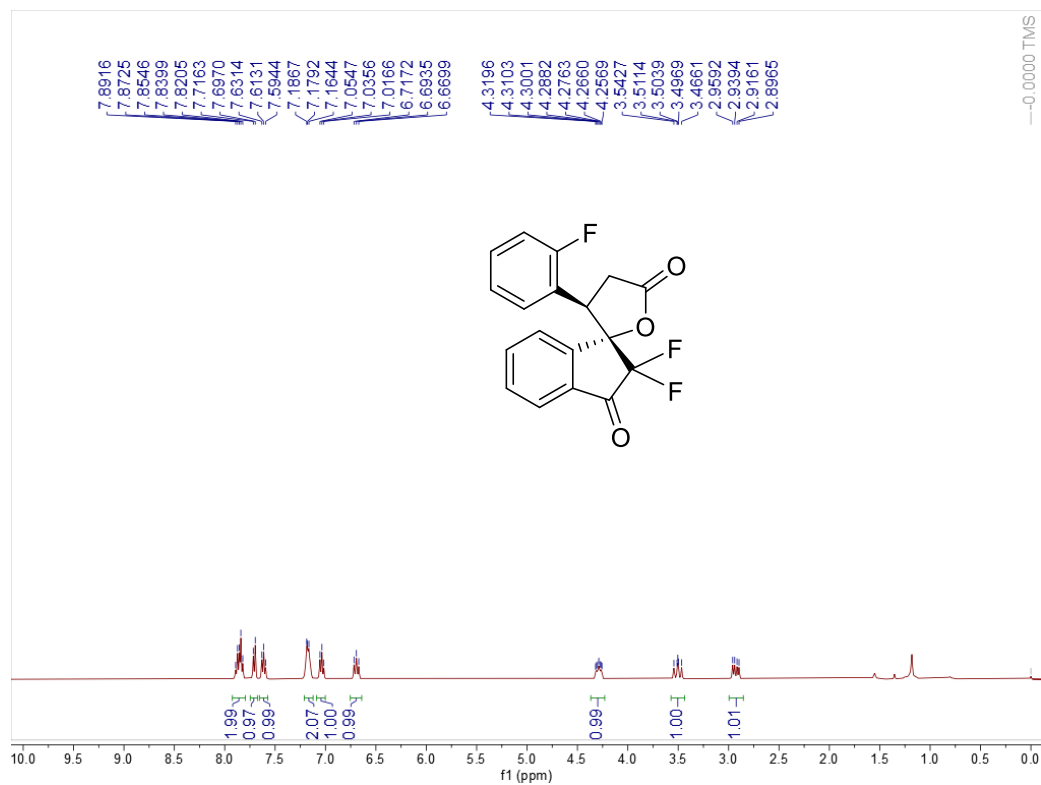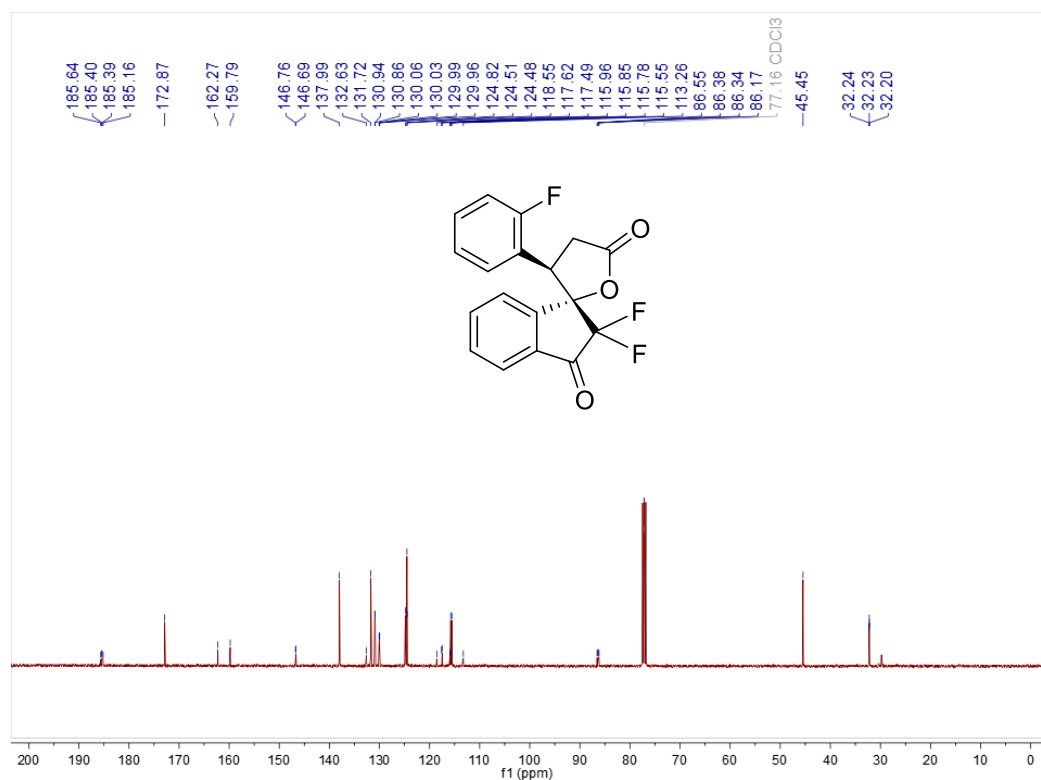

**3p**  $^{19}\text{F}$  NMR (376 MHz, Chloroform-*d*)

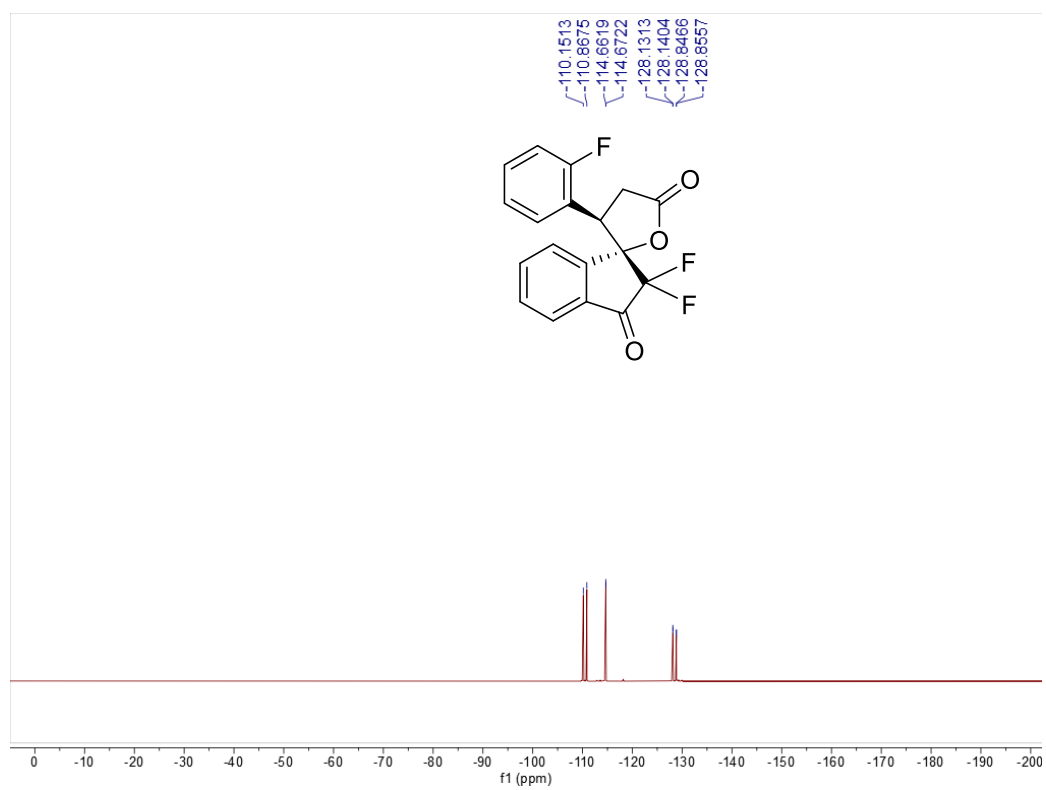

**3q**  $^1\text{H}$  NMR (400 MHz, Chloroform-*d*)/ $^{13}\text{C}$  {H} NMR (101 MHz, Chloroform-*d*)

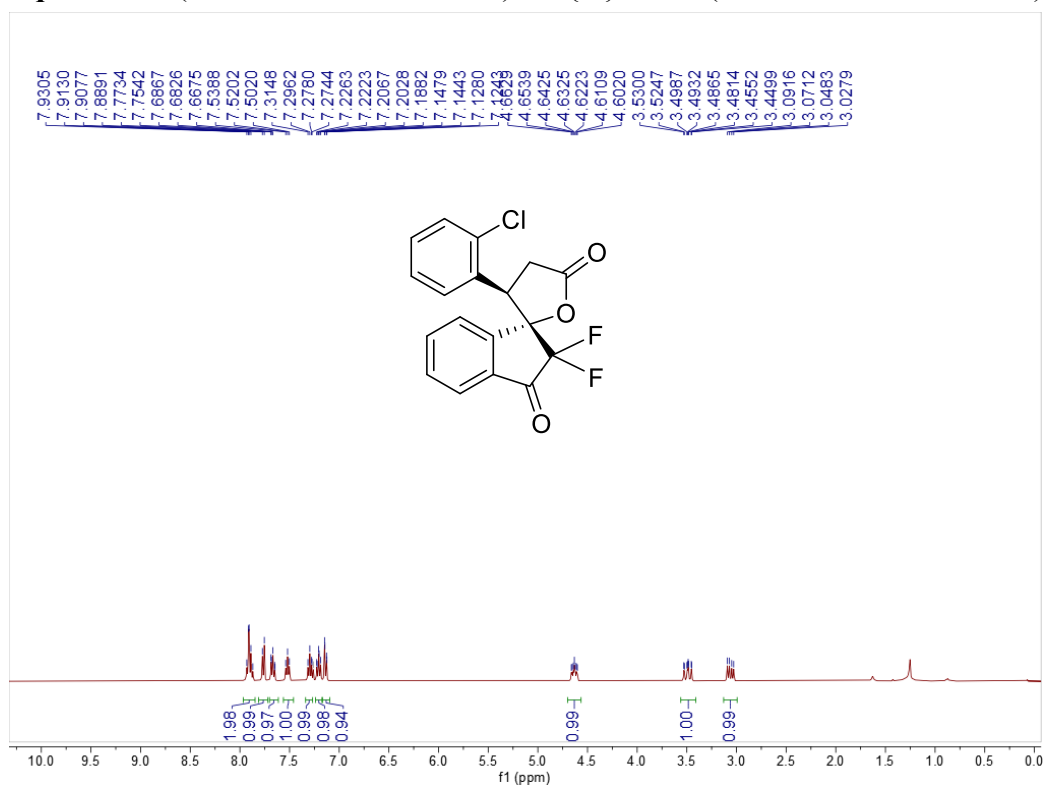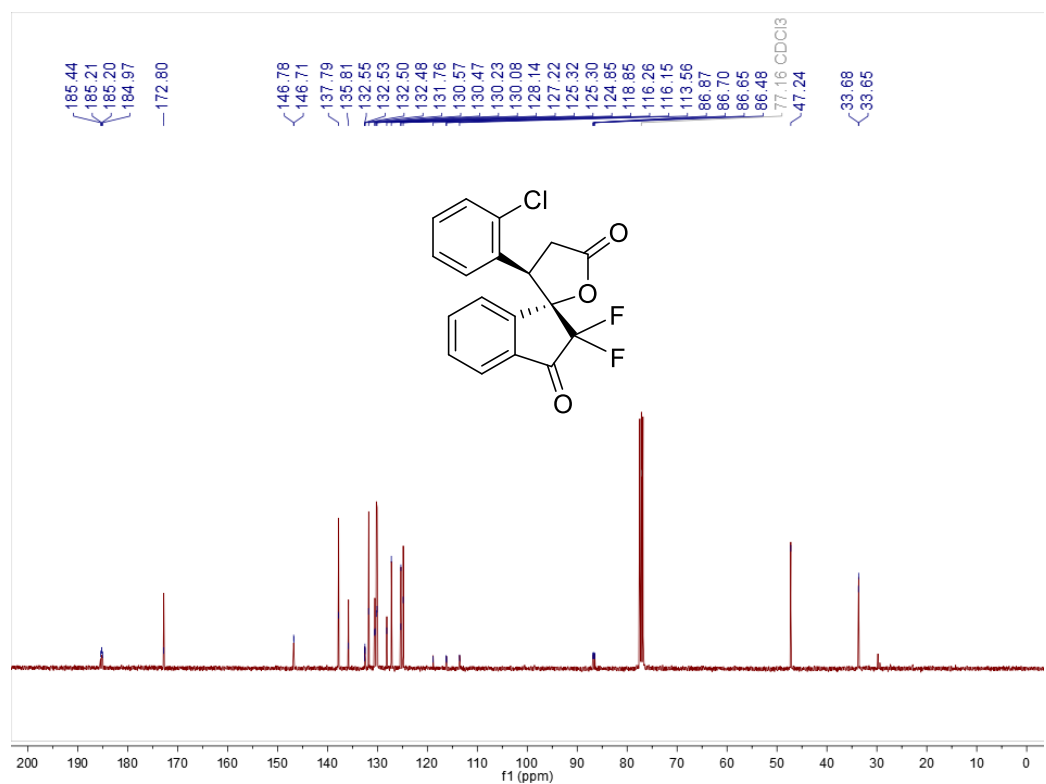

**3q**  $^{19}\text{F}$  NMR (376 MHz, Chloroform-*d*)

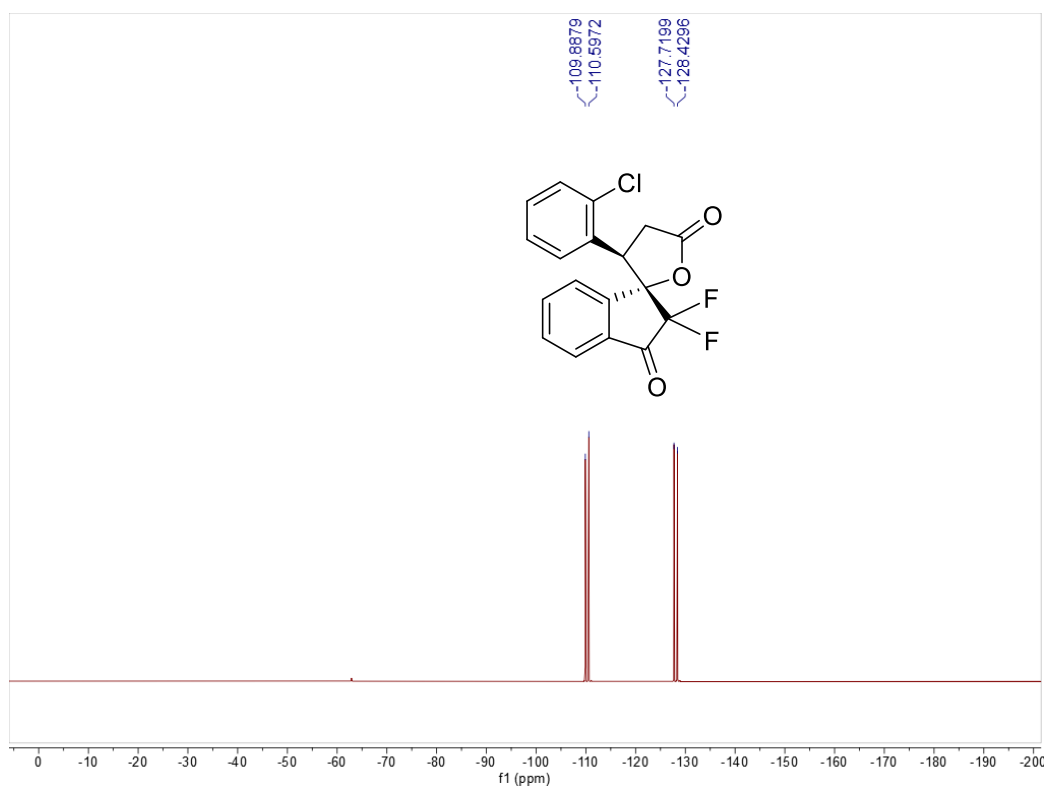



**3r**  $^{19}\text{F}$  NMR (376 MHz, Chloroform-*d*)

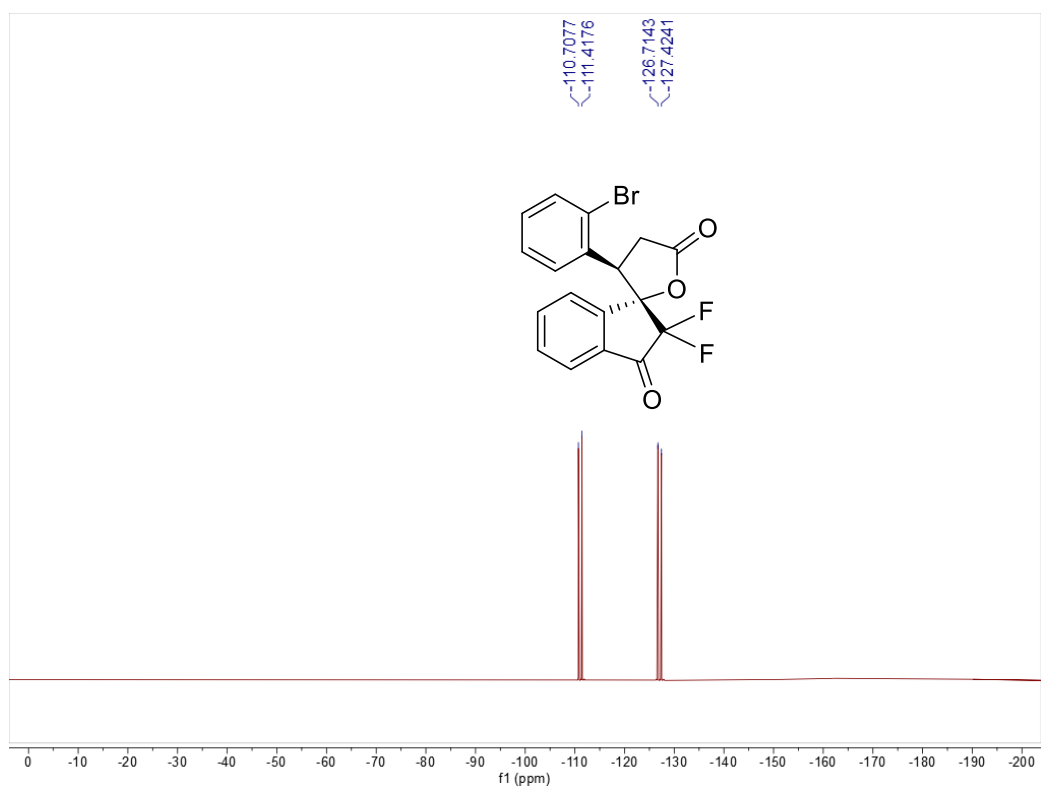



**3s**  $^1\text{H}$  NMR (400 MHz, Chloroform-*d*)/ $^{13}\text{C}$  {H} NMR (101 MHz, Chloroform-*d*)

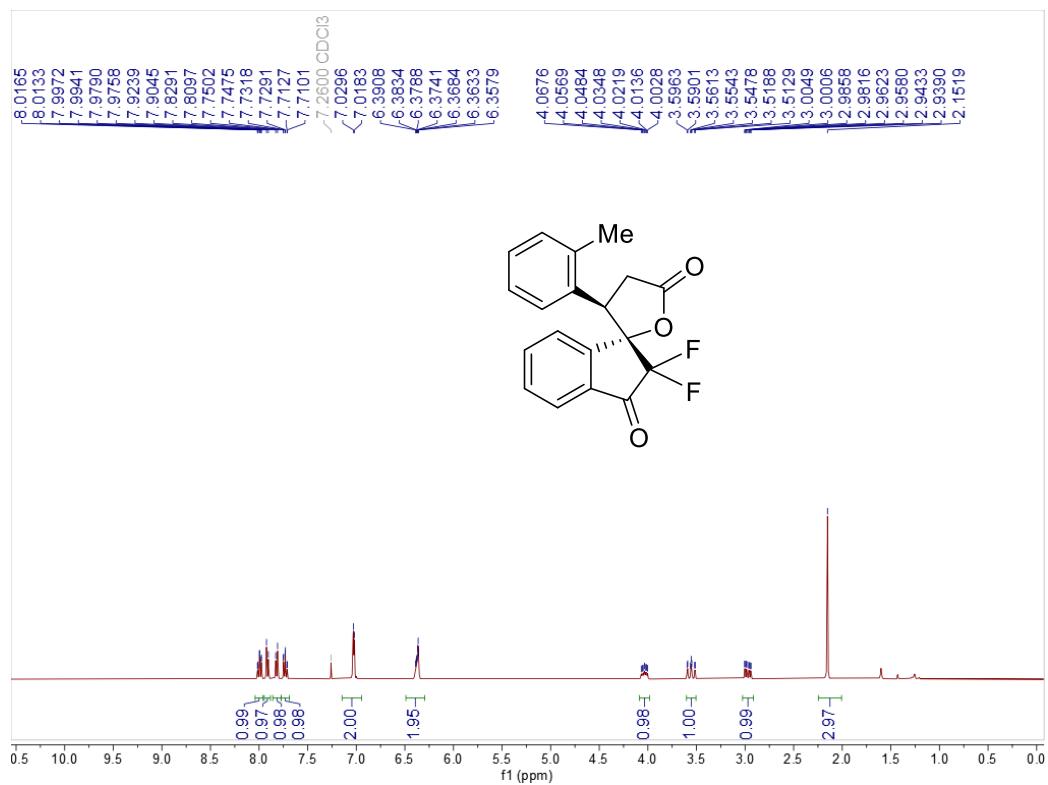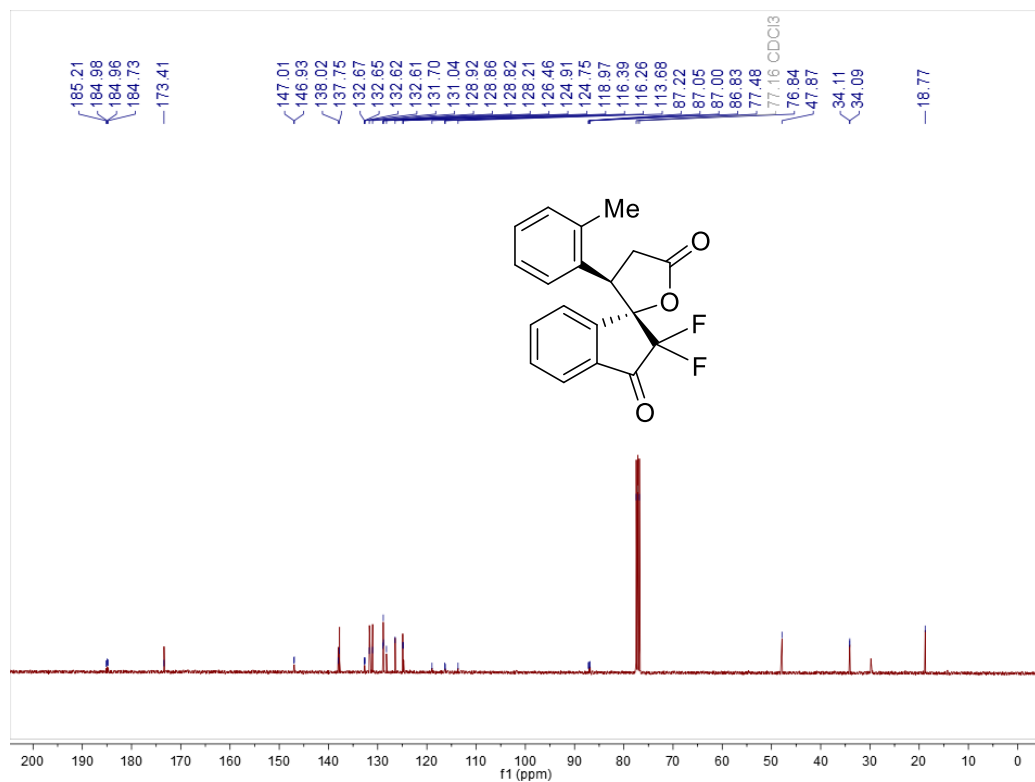

**3s**  $^{19}\text{F}$  NMR (376 MHz, Chloroform-*d*)

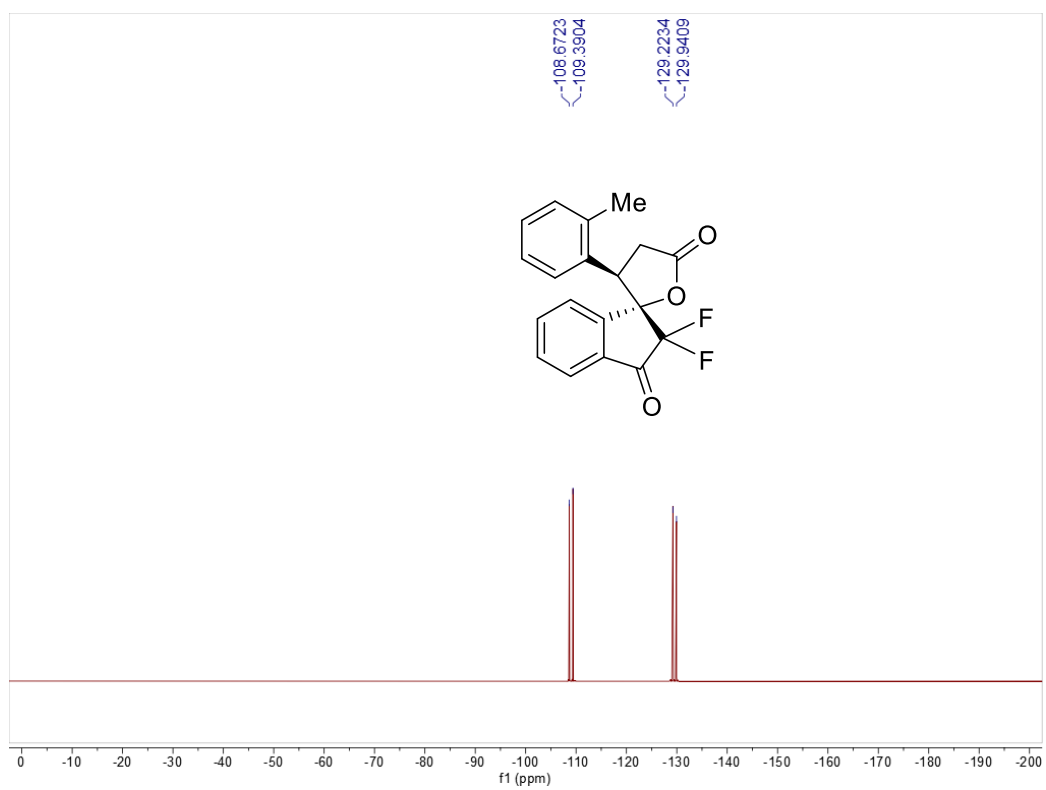



**3t**  $^{19}\text{F}$  NMR (376 MHz, Chloroform-*d*)

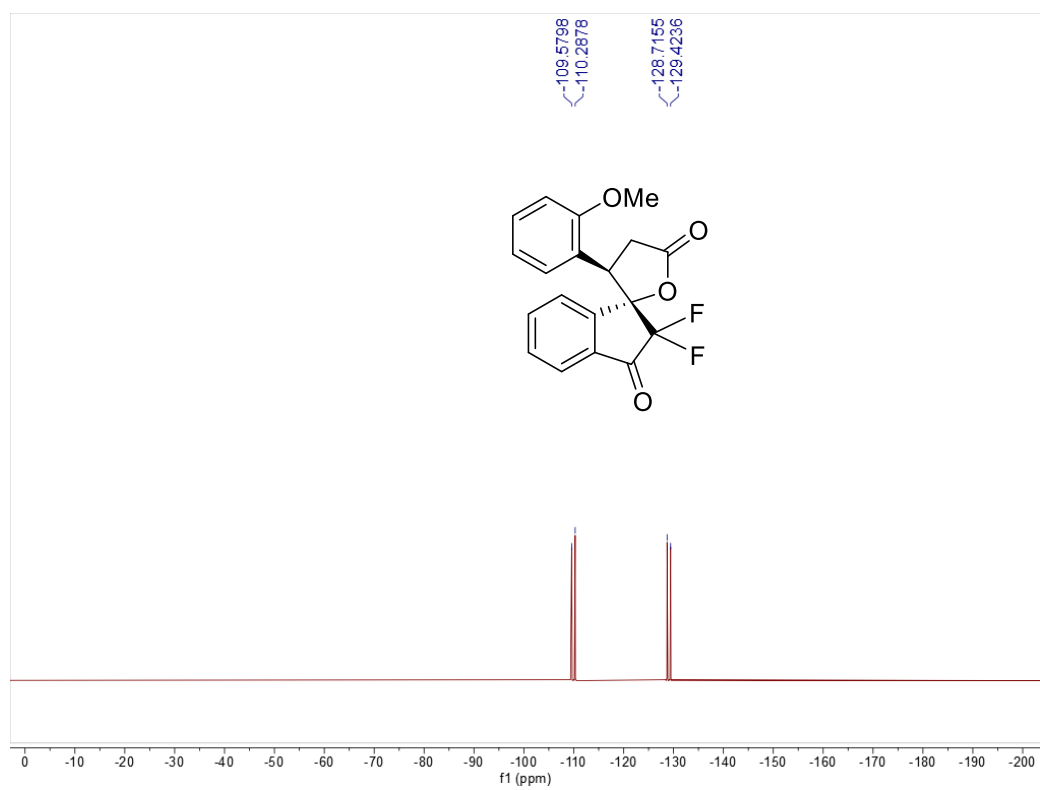

**3u**  $^1\text{H}$  NMR (300 MHz, Chloroform-*d*)/ $^{13}\text{C}$  {H} NMR (101 MHz, Chloroform-*d*)

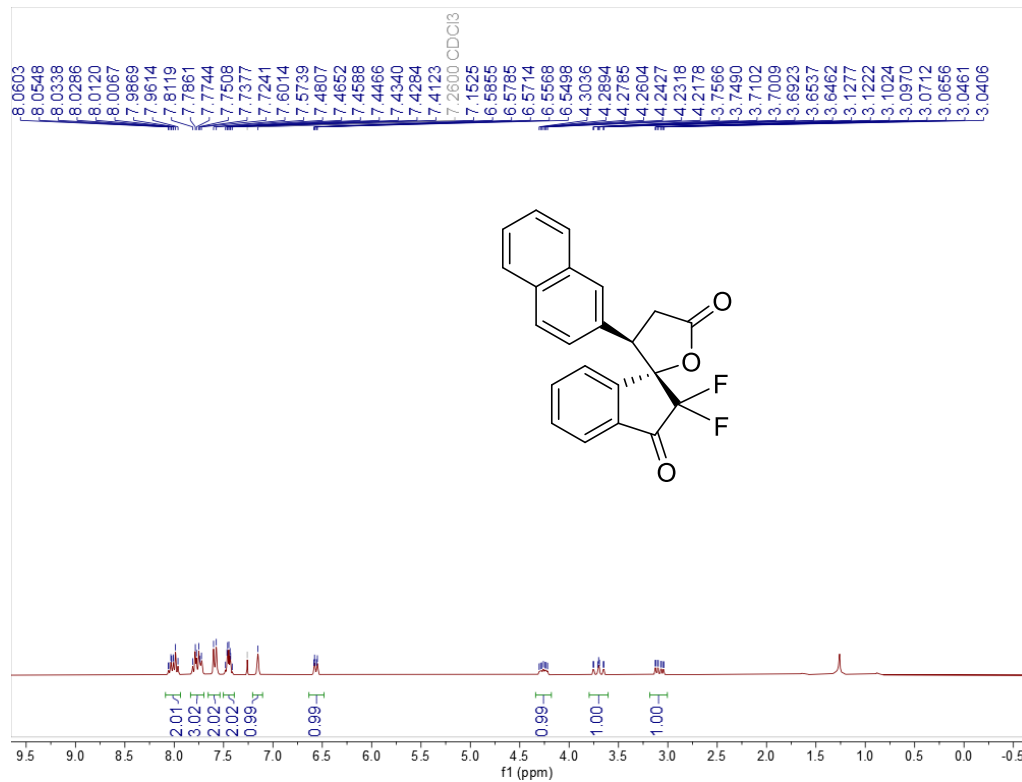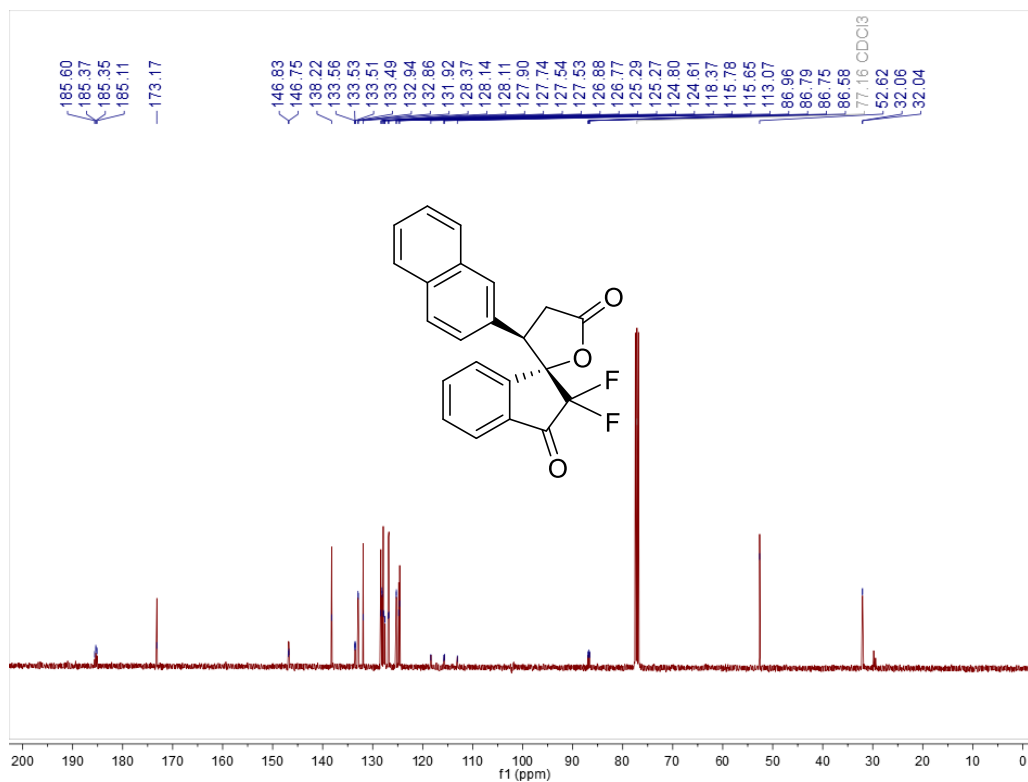

**3u**  $^{19}\text{F}$  NMR (282 MHz, Chloroform-*d*)

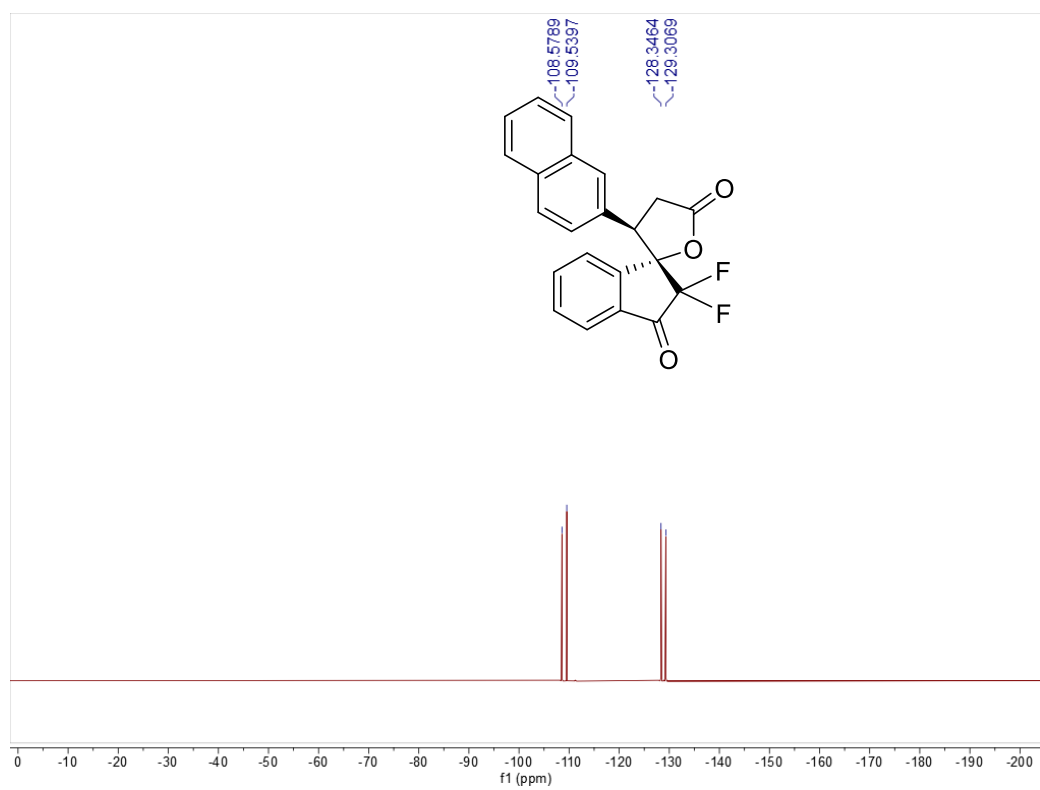

**3v**  $^1\text{H}$  NMR (300 MHz,  $\text{DMSO-}d_6$ )/ $^{13}\text{C}$  {H} NMR (101 MHz,  $\text{DMSO-}d_6$ )

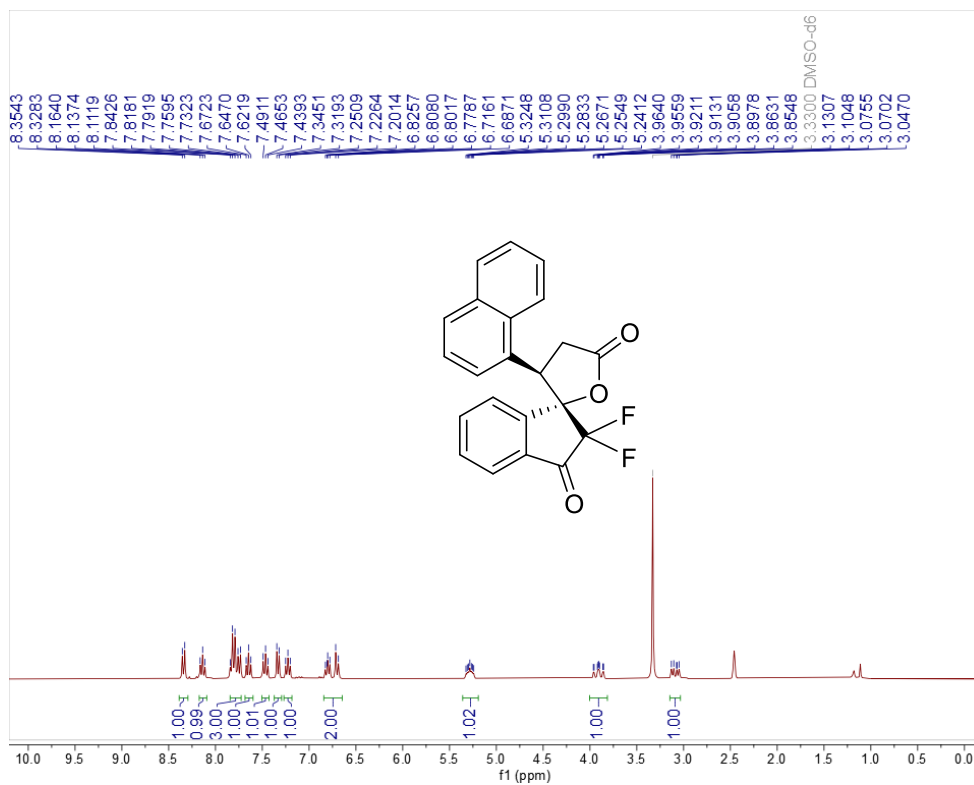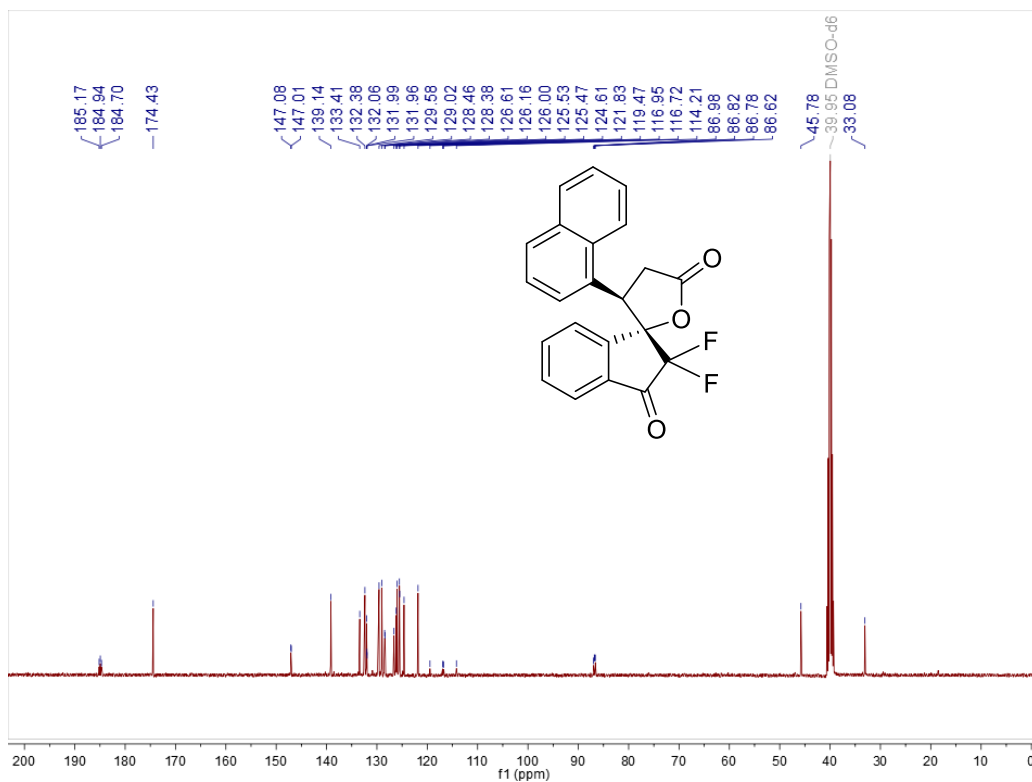

**3v**  $^{19}\text{F}$  NMR (282 MHz,  $\text{DMSO-}d_6$ )

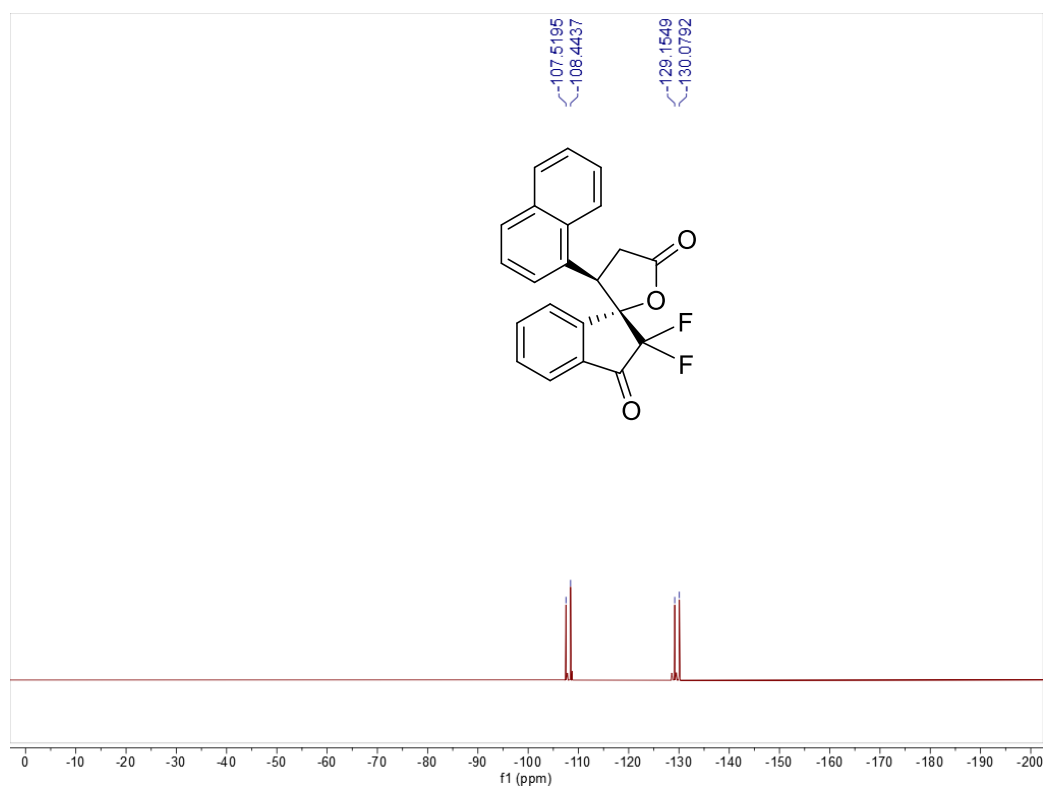



**3w**  $^1\text{H}$  NMR (300 MHz, Chloroform-*d*)/ $^{13}\text{C}$  {1H} NMR (101 MHz, Chloroform-*d*)

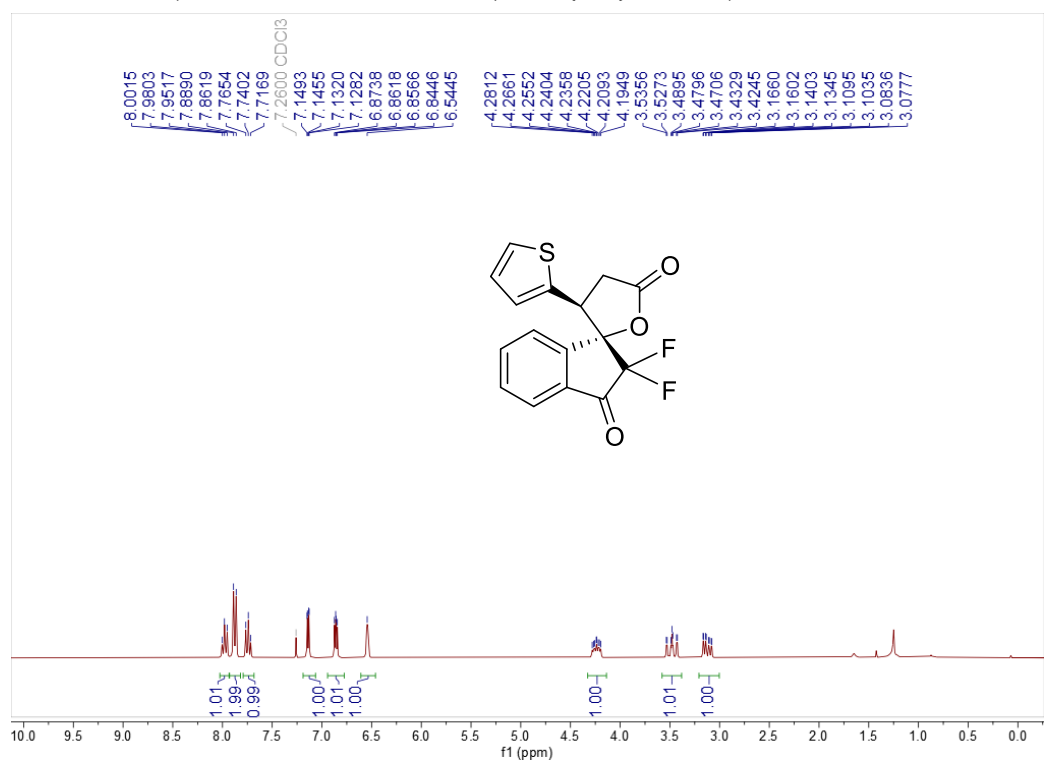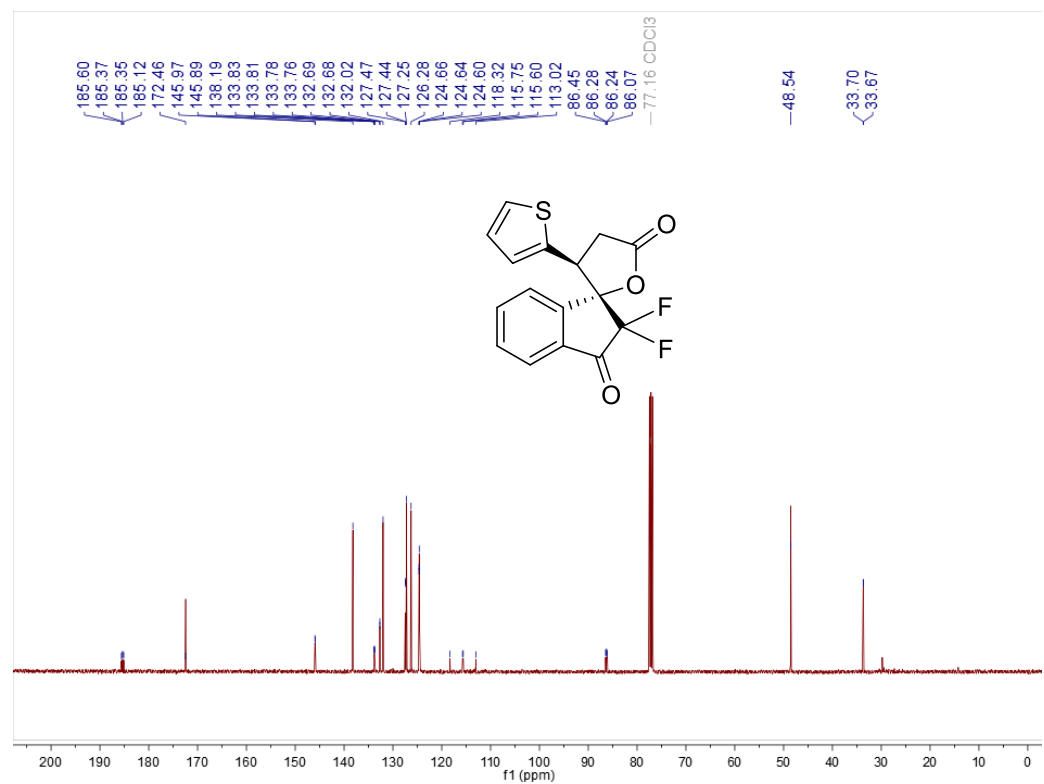

**3w**  $^{19}\text{F}$  NMR (282 MHz, Chloroform-*d*)

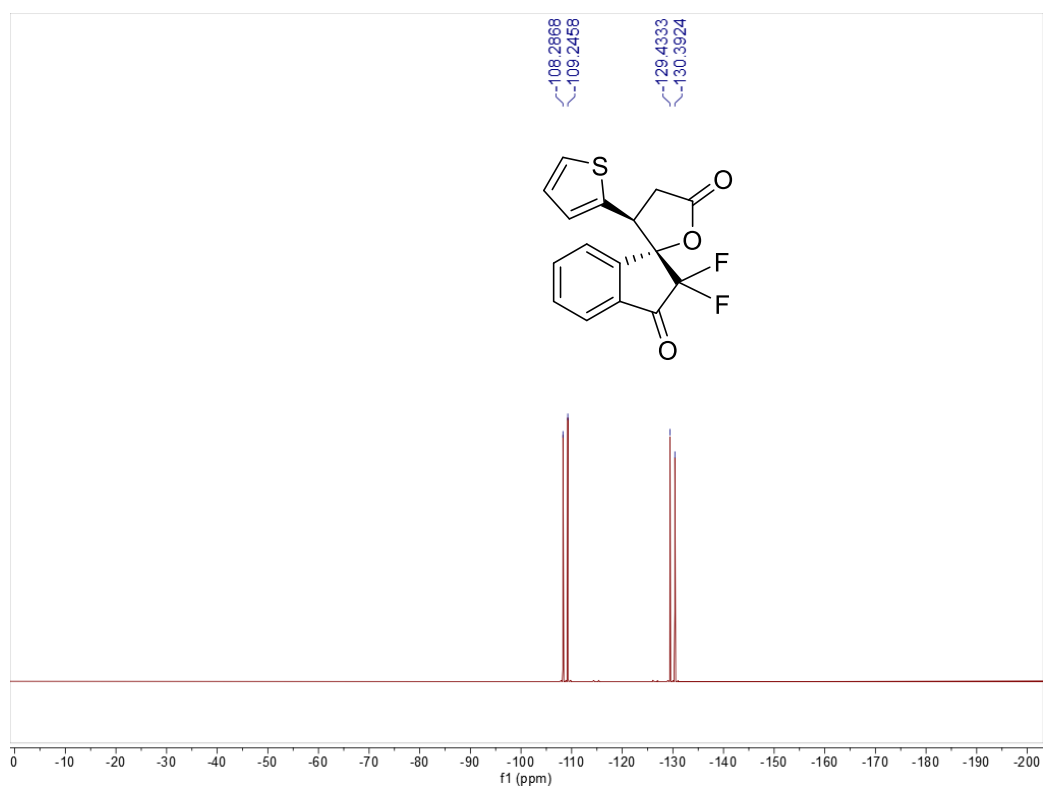

**3x**  $^1\text{H}$  NMR (400 MHz,  $\text{DMSO-}d_6$ )/ $^{13}\text{C}$  {H} NMR (101 MHz,  $\text{DMSO-}d_6$ )

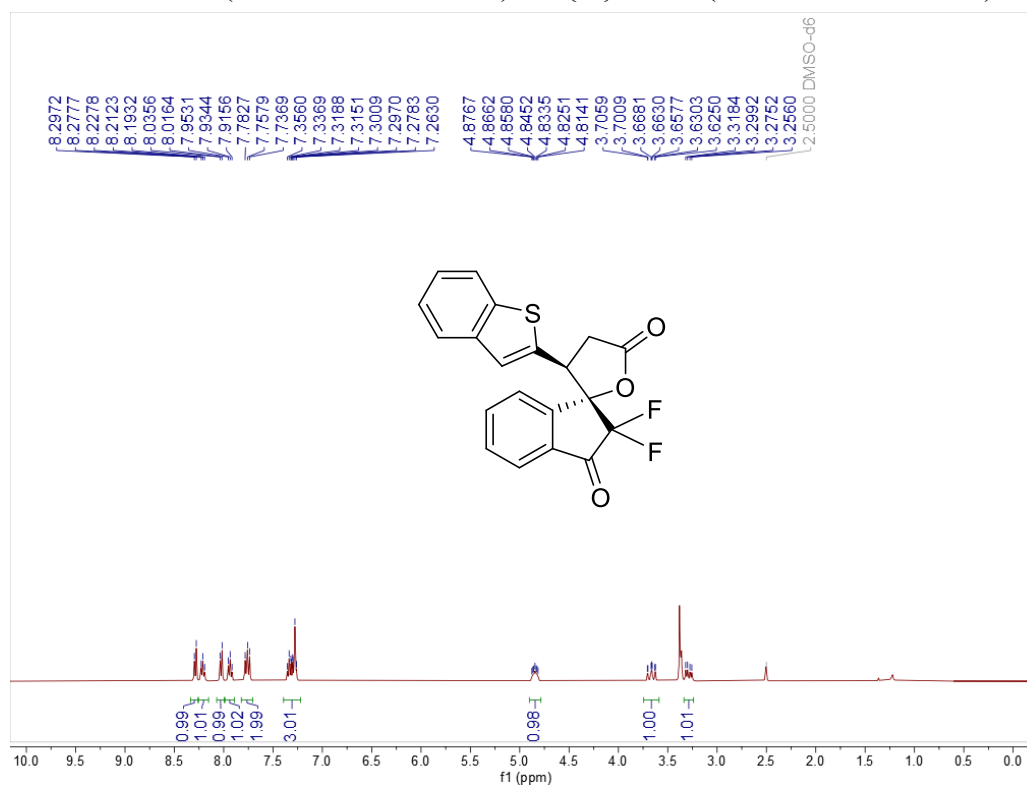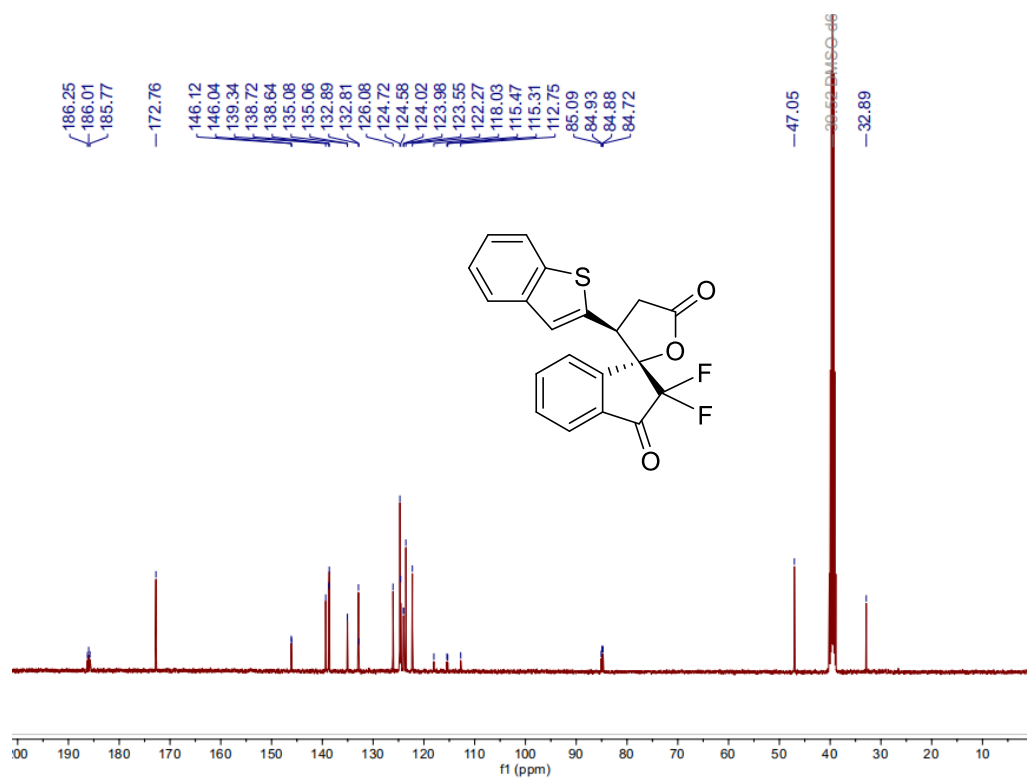

**3x**  $^{19}\text{F}$  NMR (376 MHz,  $\text{DMSO-}d_6$ )

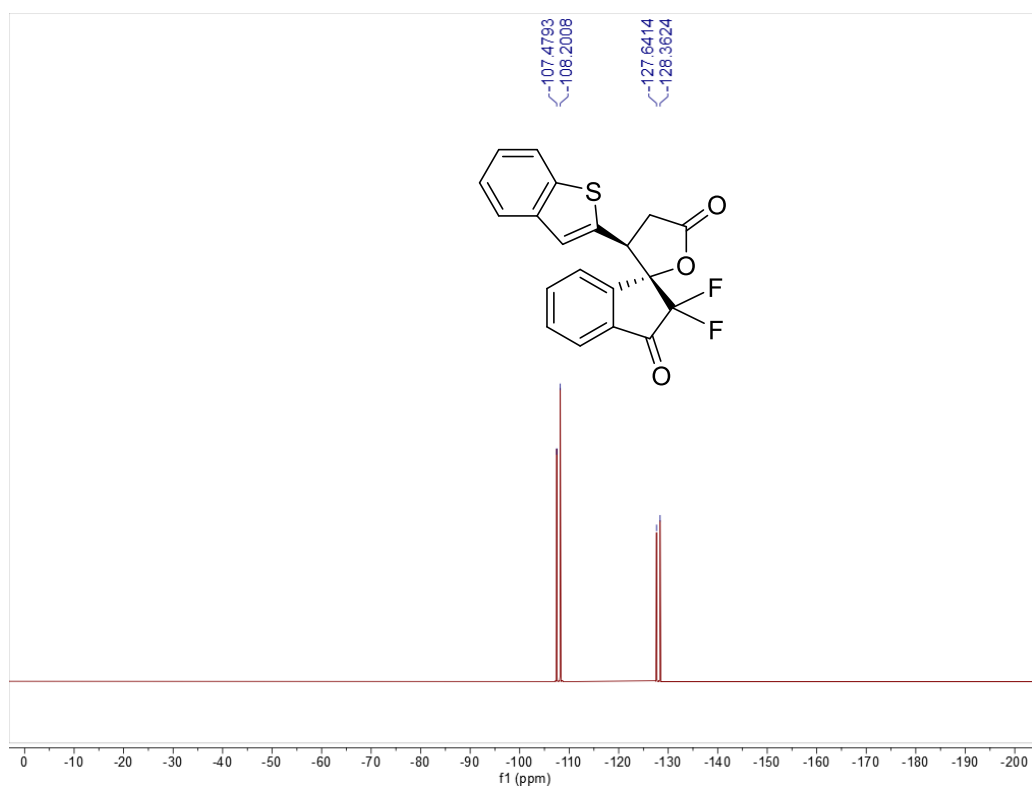

**3y**  $^1\text{H}$  NMR (400 MHz, Chloroform-*d*)/ $^{13}\text{C}$  {H} NMR (101 MHz, Chloroform-*d*)

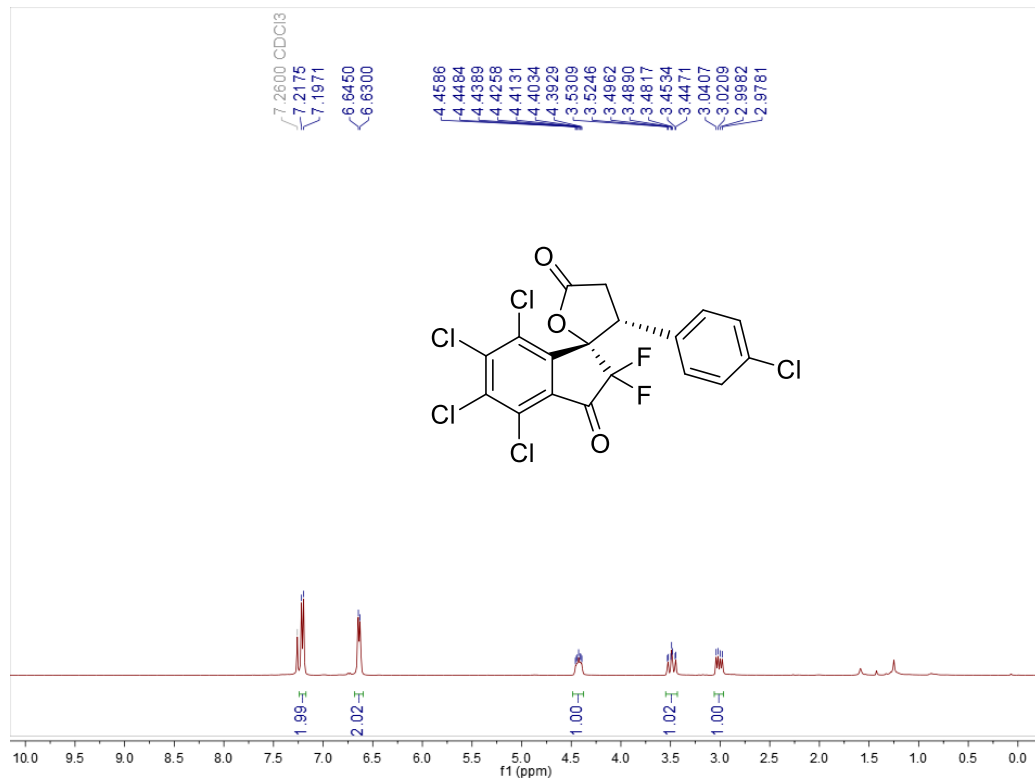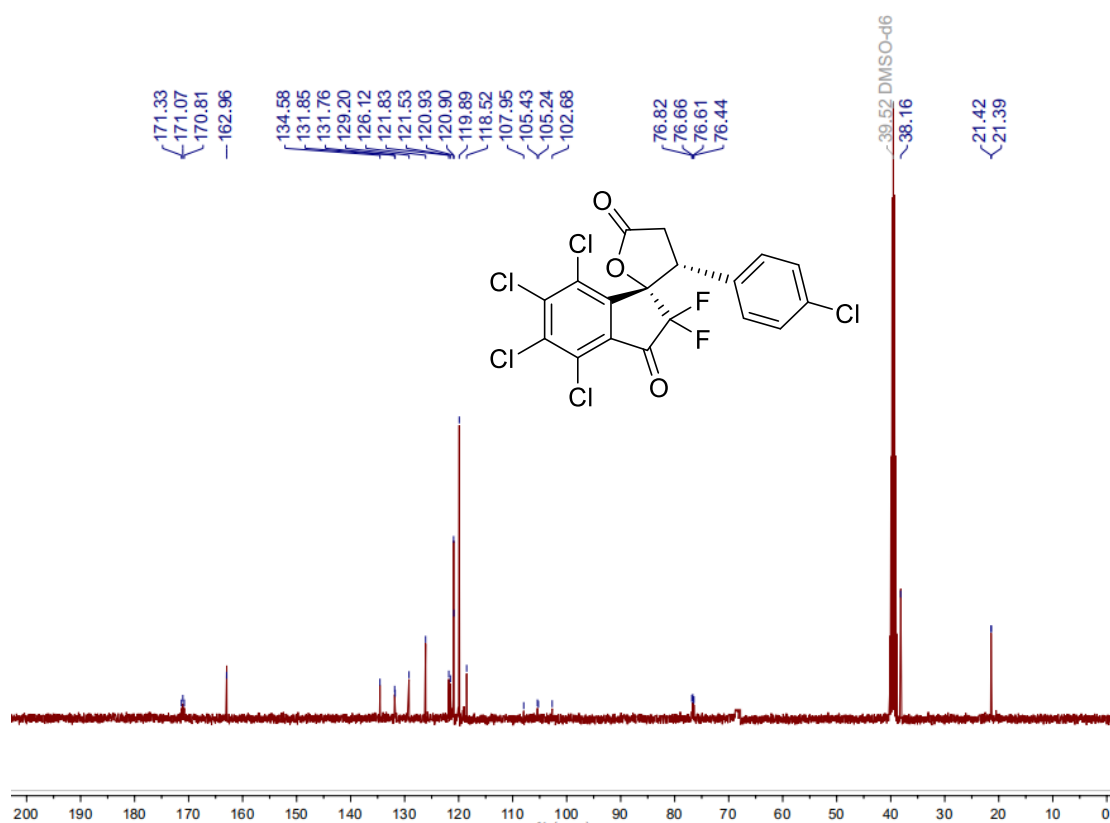

3y  $^{19}\text{F}$  NMR (376 MHz, Chloroform-*d*)

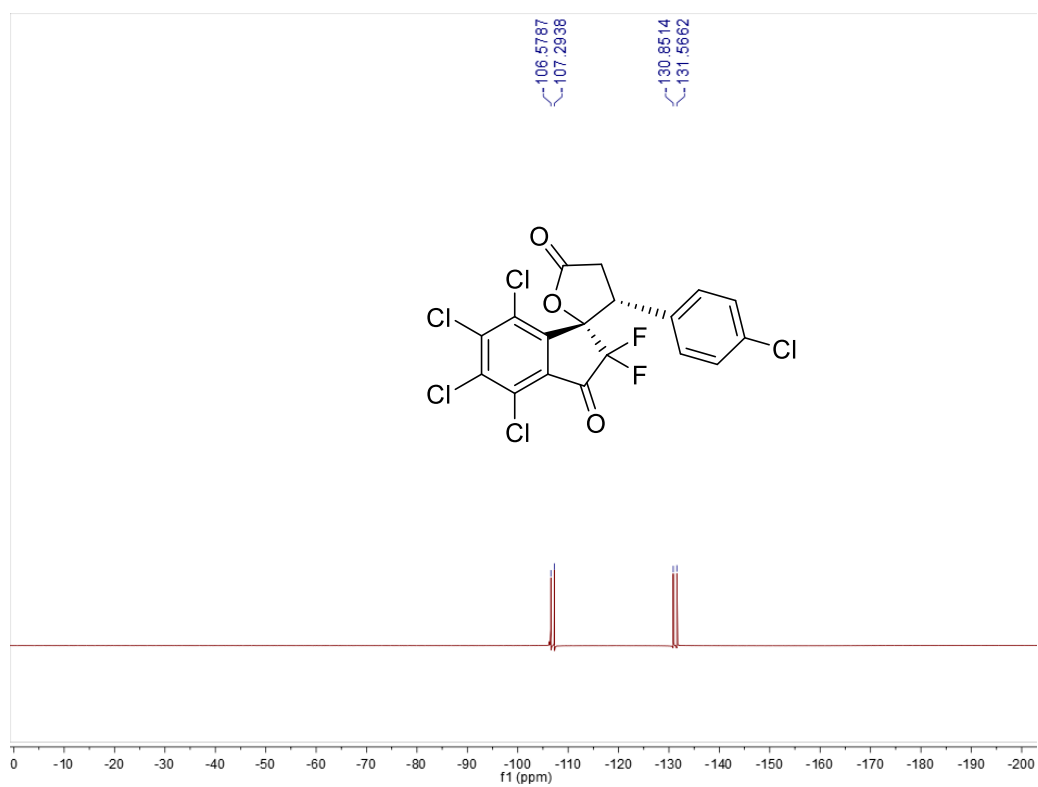

$^1\text{H}$  NMR (400 MHz,  $\text{DMSO-}d_6$ )  $^{13}\text{C}$  {H} NMR (101 MHz,  $\text{DMSO-}d_6$ )

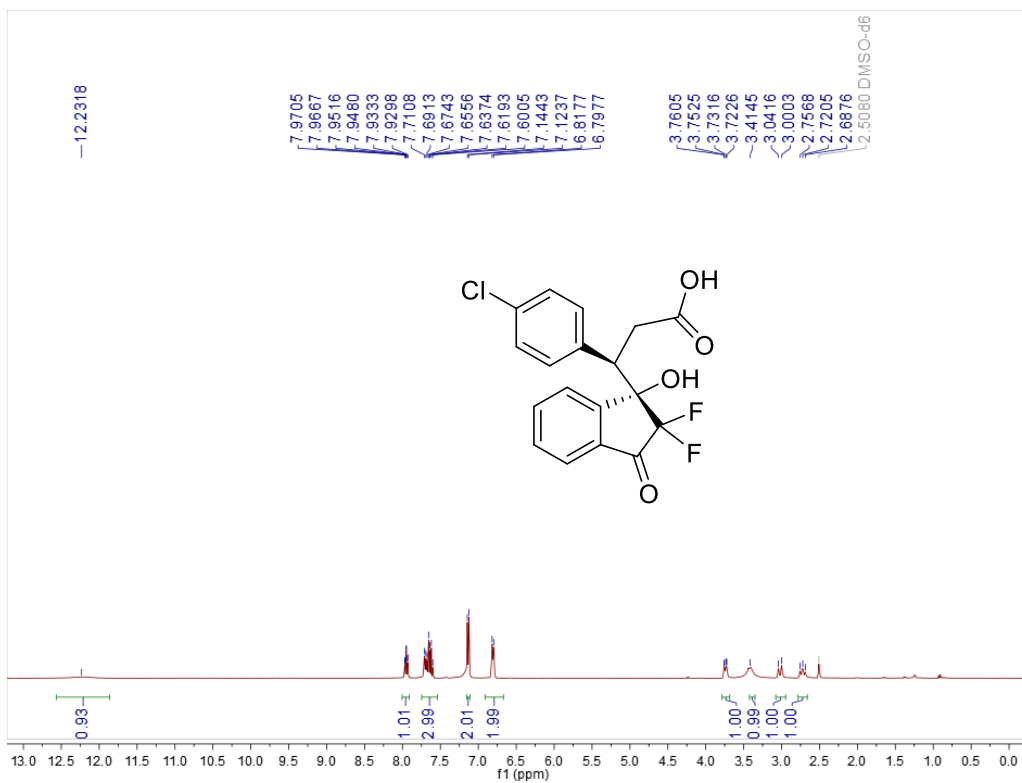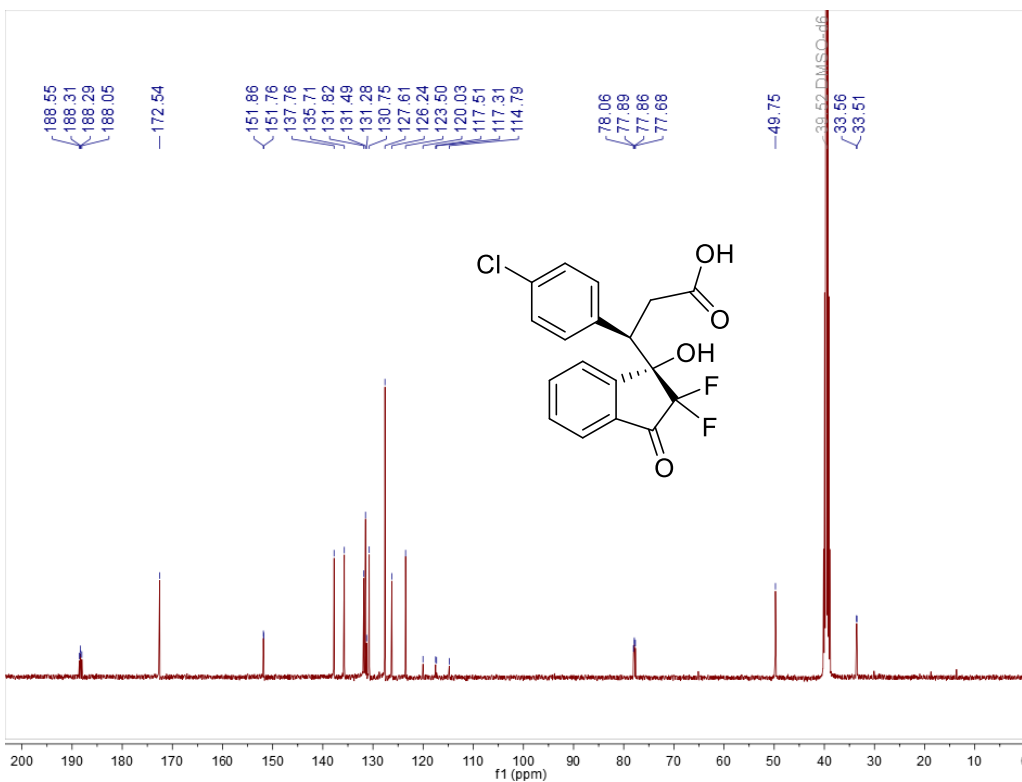

6  $^{19}\text{F}$  NMR (376 MHz,  $\text{DMSO-}d_6$ )

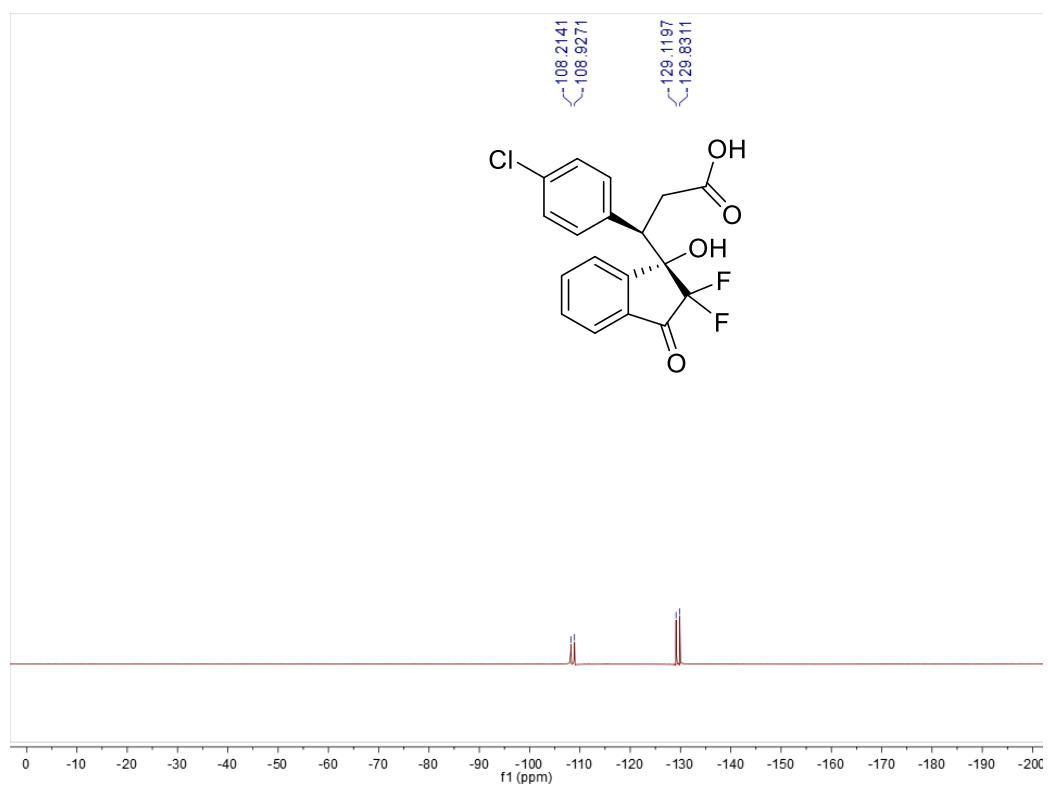



8  $^1\text{H}$  NMR (300 MHz, Chloroform-*d*)/ $^{13}\text{C}$  {H} NMR (101 MHz, Chloroform-*d*)

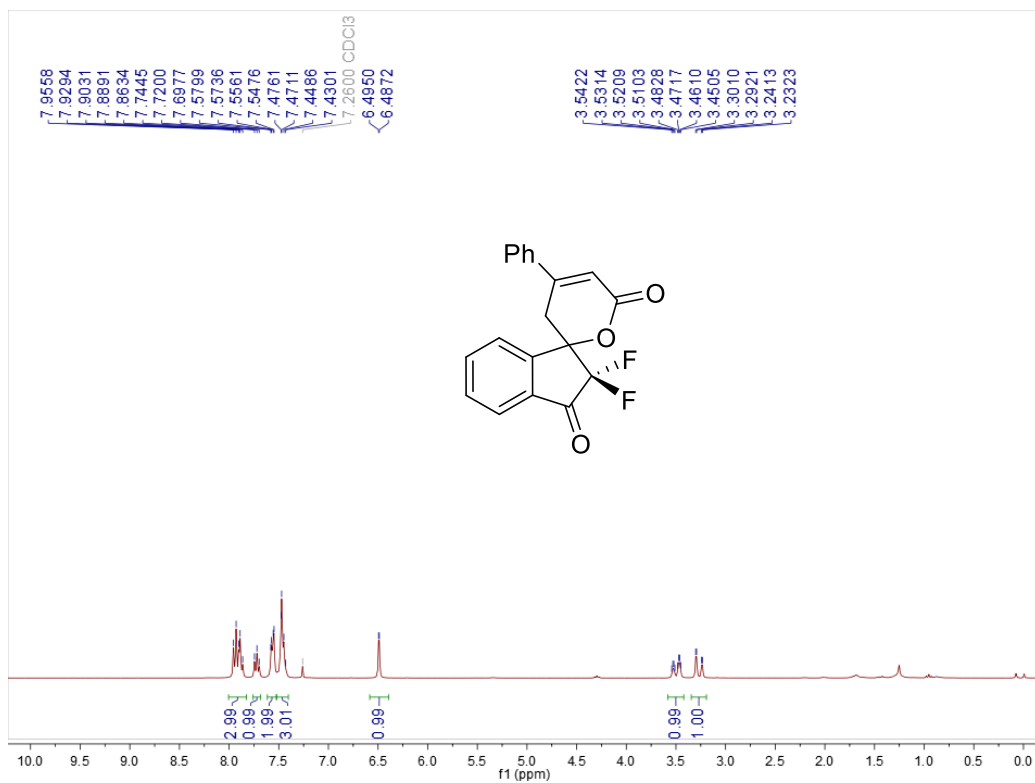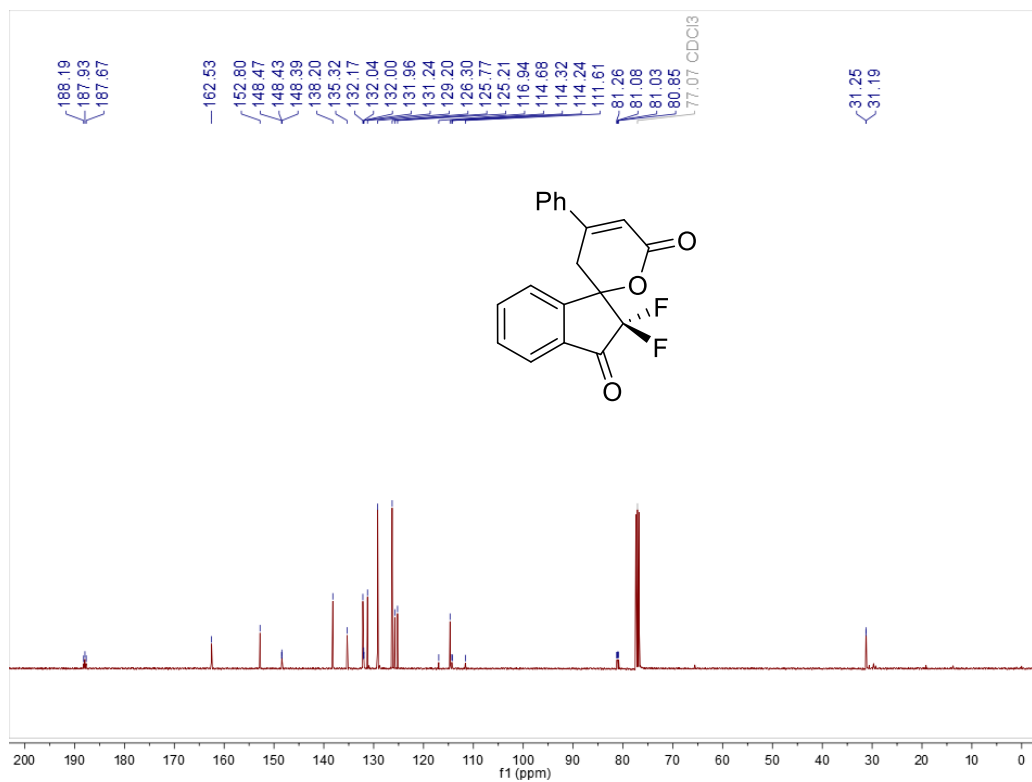

8  $^{19}\text{F}$  NMR (282 MHz, Chloroform-*d*)

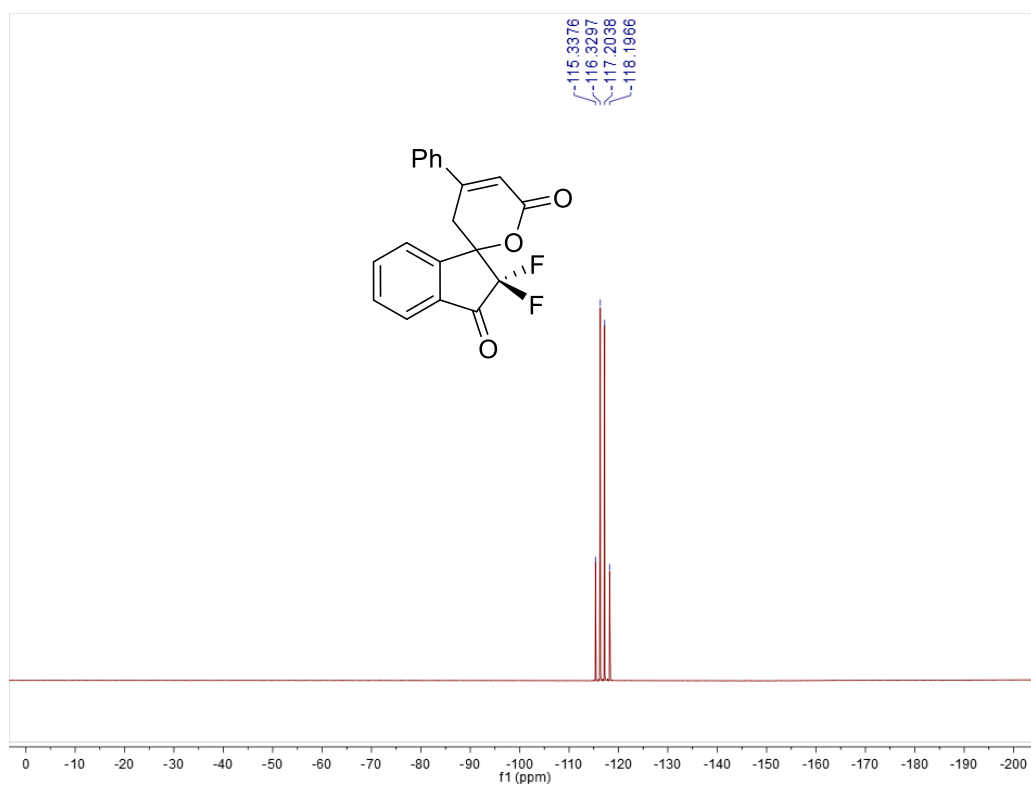

## 9. Copies of the HPLC spectra

3a

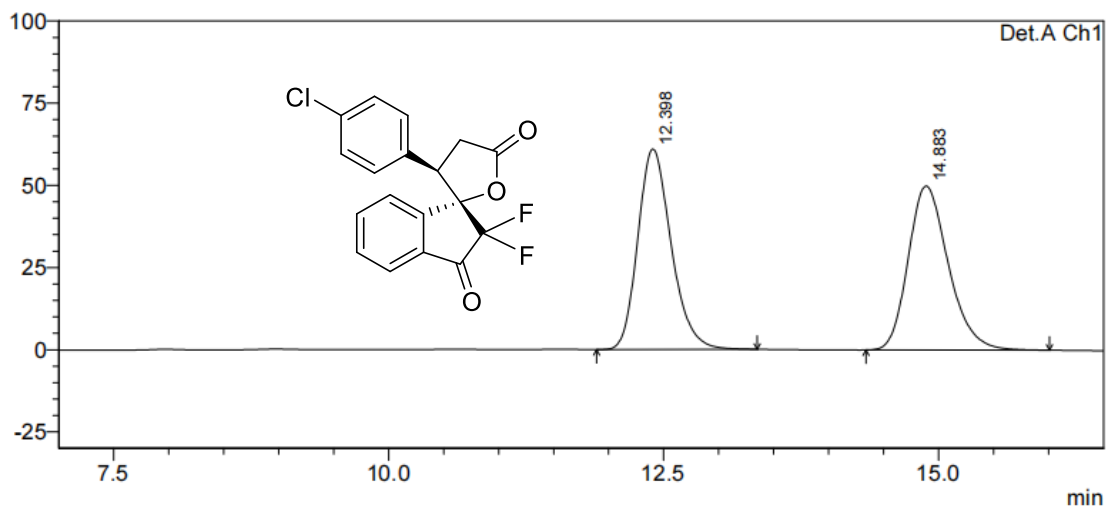

| Peak# | Ret. Time | Area    | Height | Area %  | Height % |
|-------|-----------|---------|--------|---------|----------|
| 1     | 12.398    | 1288268 | 60977  | 50.348  | 54.996   |
| 2     | 14.883    | 1270441 | 49899  | 49.652  | 45.004   |
| Total |           | 2558710 | 110876 | 100.000 | 100.000  |

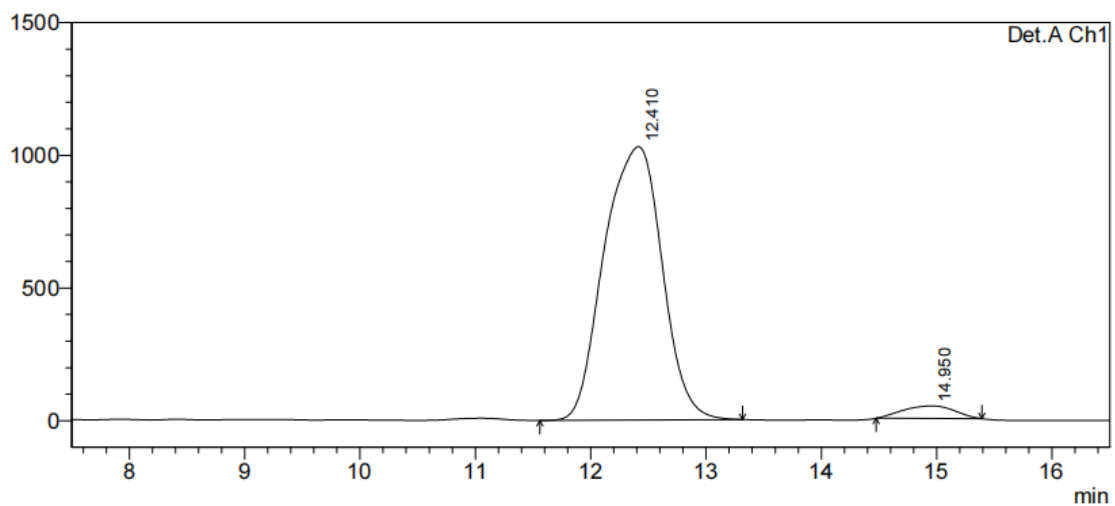

| Peak# | Ret. Time | Area     | Height  | Area %  | Height % |
|-------|-----------|----------|---------|---------|----------|
| 1     | 12.410    | 36019641 | 1030178 | 96.038  | 95.607   |
| 2     | 14.950    | 1486114  | 47335   | 3.962   | 4.393    |
| Total |           | 37505755 | 1077513 | 100.000 | 100.000  |

**3b**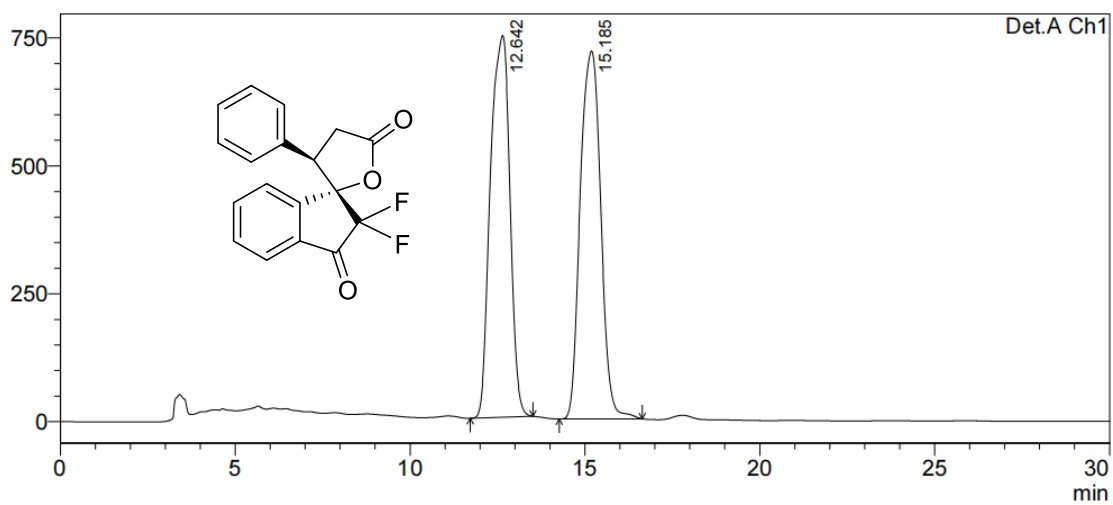

| Peak# | Ret. Time | Area     | Height  | Area %  | Height % |
|-------|-----------|----------|---------|---------|----------|
| 1     | 12.642    | 28898023 | 745952  | 49.618  | 50.914   |
| 2     | 15.185    | 29343007 | 719165  | 50.382  | 49.086   |
| Total |           | 58241030 | 1465117 | 100.000 | 100.000  |

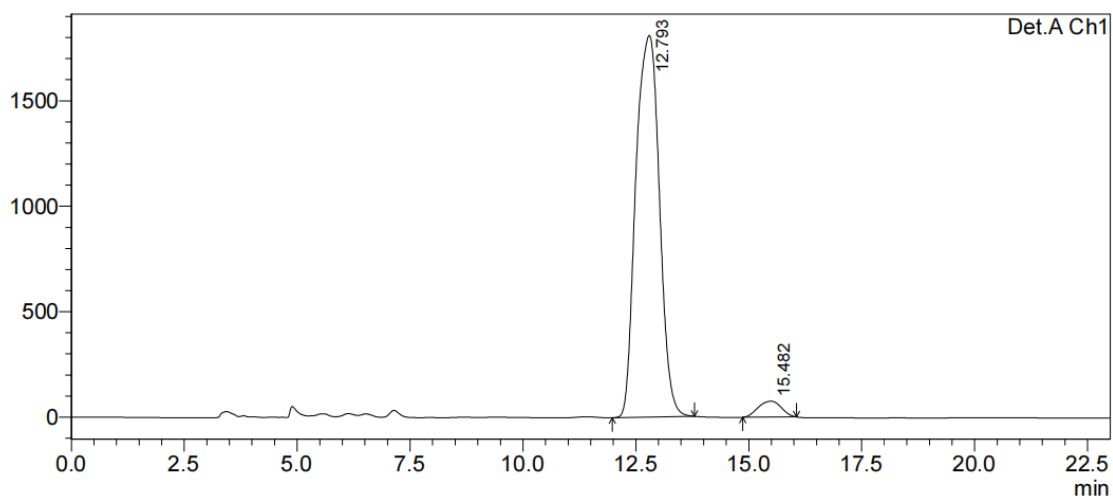

| Peak# | Ret. Time | Area     | Height  | Area %  | Height % |
|-------|-----------|----------|---------|---------|----------|
| 1     | 12.793    | 65756566 | 1809342 | 96.078  | 95.997   |
| 2     | 15.482    | 2684255  | 75453   | 3.922   | 4.003    |
| Total |           | 68440821 | 1884795 | 100.000 | 100.000  |

3c

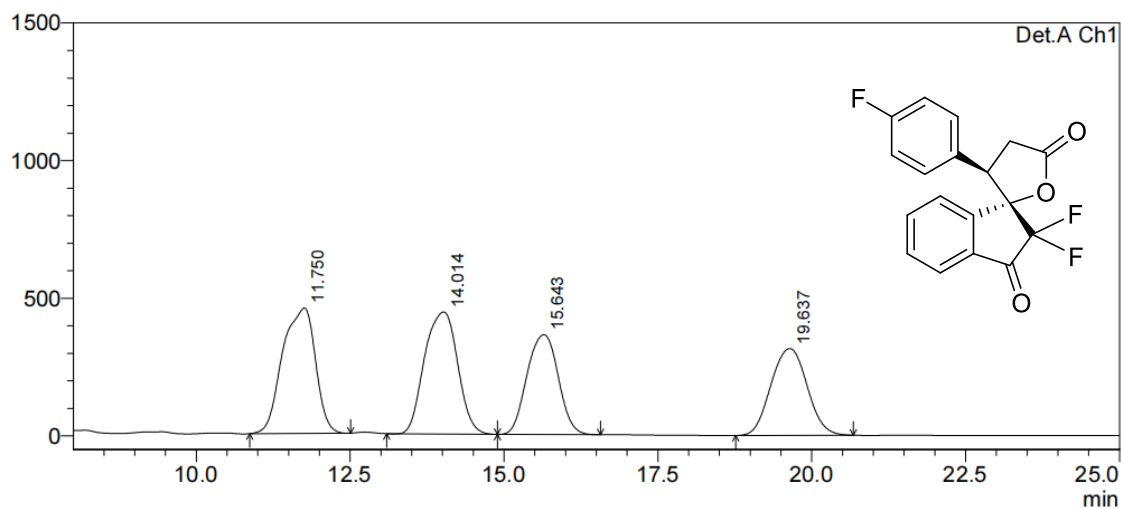

| Peak# | Ret. Time | Area     | Height  | Area %  | Height % |
|-------|-----------|----------|---------|---------|----------|
| 1     | 11.750    | 16951030 | 455470  | 28.546  | 28.876   |
| 2     | 14.014    | 16664573 | 443712  | 28.064  | 28.131   |
| 3     | 15.643    | 12851173 | 362650  | 21.642  | 22.992   |
| 4     | 19.637    | 12914070 | 315485  | 21.748  | 20.001   |
| Total |           | 59380847 | 1577317 | 100.000 | 100.000  |

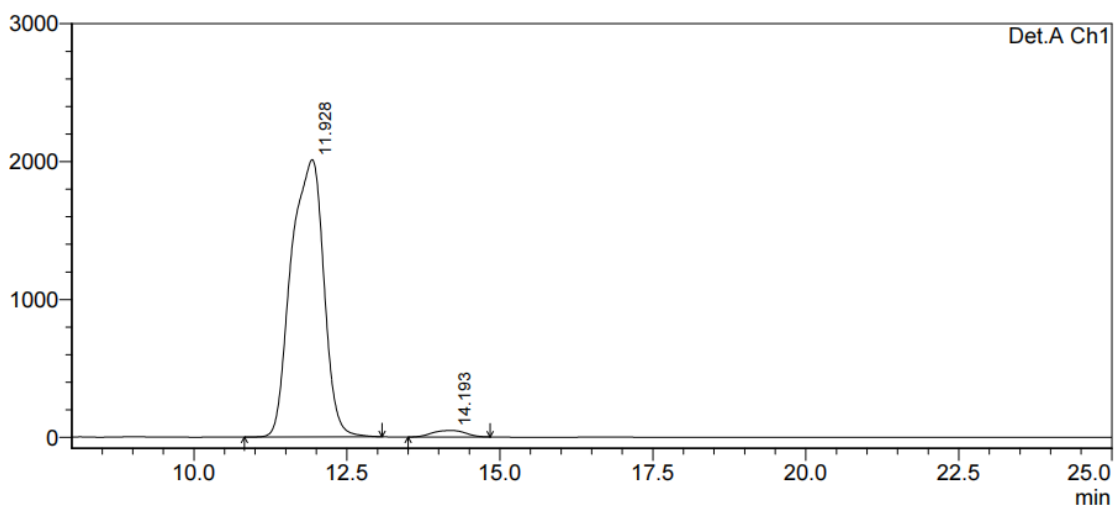

| Peak# | Ret. Time | Area     | Height  | Area %  | Height % |
|-------|-----------|----------|---------|---------|----------|
| 1     | 11.928    | 74362663 | 2011650 | 97.666  | 97.728   |
| 2     | 14.193    | 1777079  | 46774   | 2.334   | 2.272    |
| Total |           | 76139741 | 2058424 | 100.000 | 100.000  |

3d

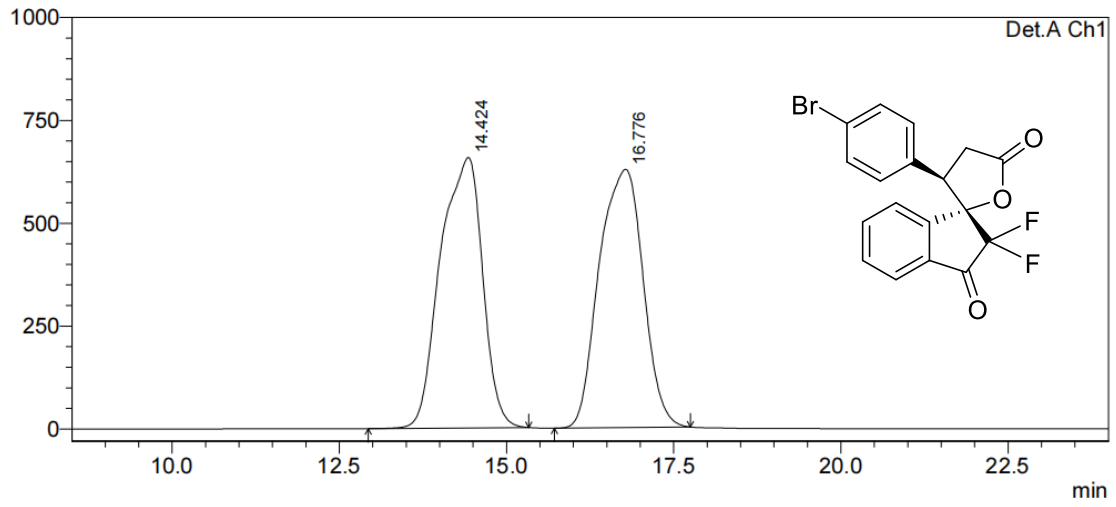

| Peak# | Ret. Time | Area     | Height  | Area %  | Height % |
|-------|-----------|----------|---------|---------|----------|
| 1     | 14.424    | 28737197 | 657369  | 50.039  | 51.158   |
| 2     | 16.776    | 28692447 | 627610  | 49.961  | 48.842   |
| Total |           | 57429644 | 1284978 | 100.000 | 100.000  |

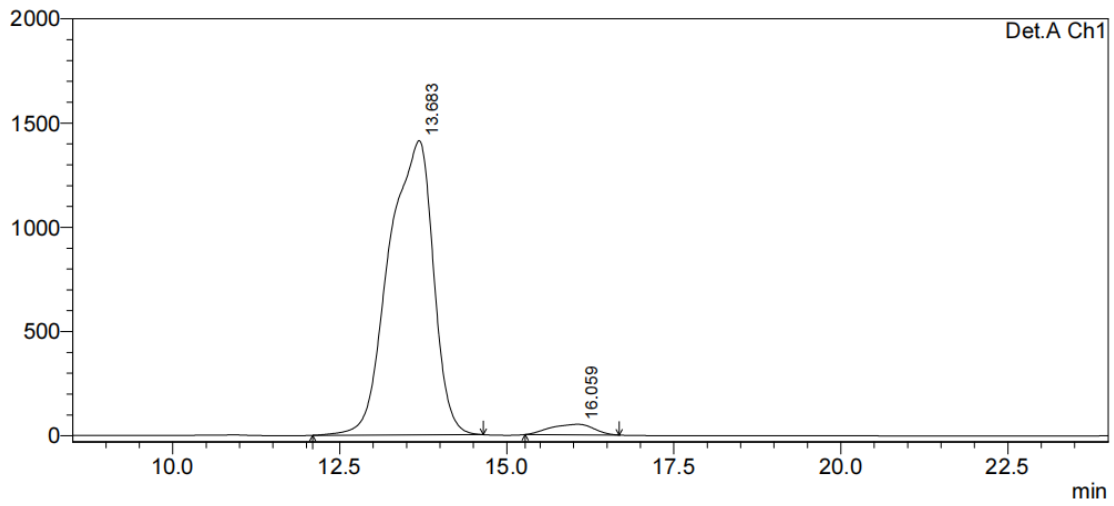

| Peak# | Ret. Time | Area     | Height  | Area %  | Height % |
|-------|-----------|----------|---------|---------|----------|
| 1     | 13.683    | 65018598 | 1411645 | 96.613  | 96.539   |
| 2     | 16.059    | 2279231  | 50613   | 3.387   | 3.461    |
| Total |           | 67297829 | 1462258 | 100.000 | 100.000  |

3e

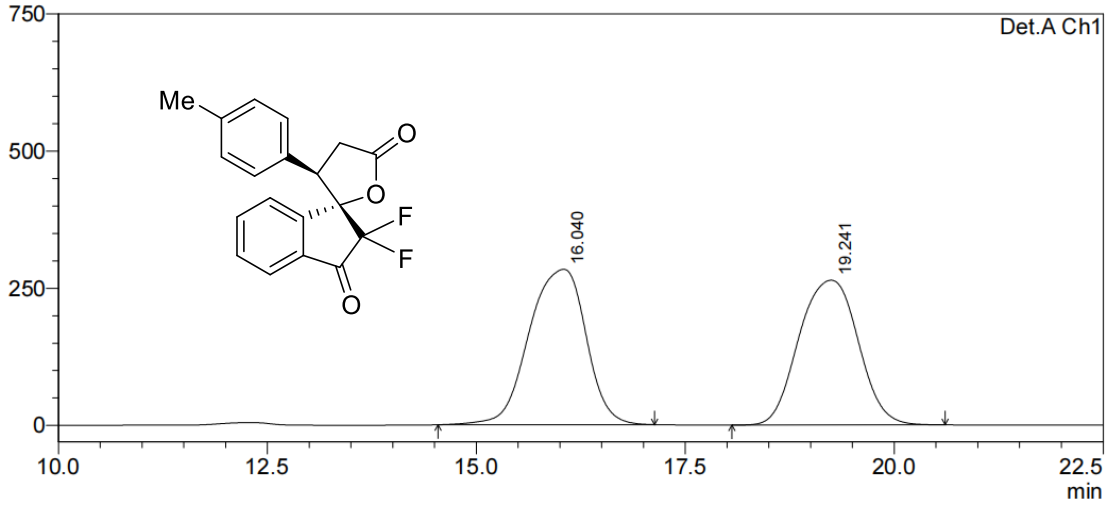

| Peak# | Ret. Time | Area     | Height | Area %  | Height % |
|-------|-----------|----------|--------|---------|----------|
| 1     | 16.040    | 13453603 | 283288 | 50.811  | 51.765   |
| 2     | 19.241    | 13024107 | 263975 | 49.189  | 48.235   |
| Total |           | 26477710 | 547263 | 100.000 | 100.000  |

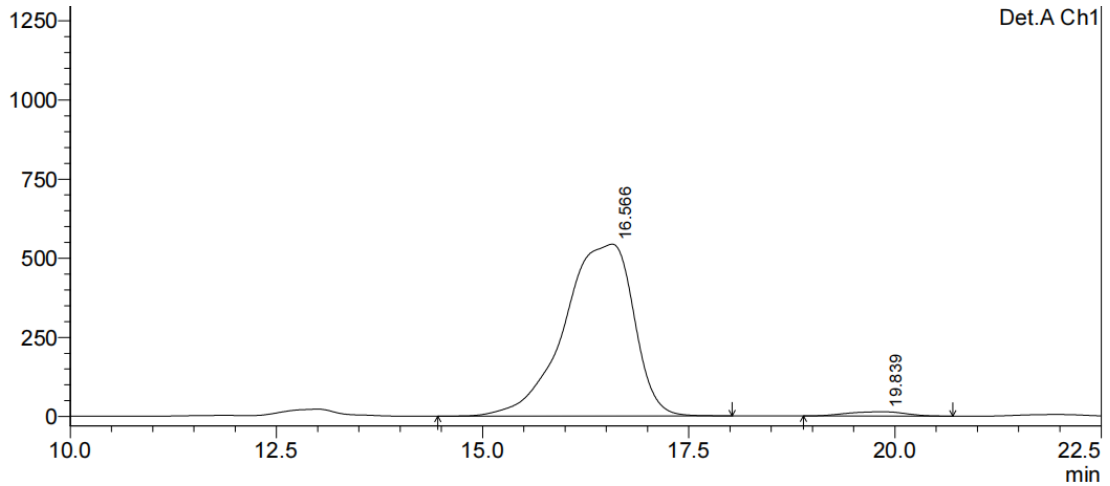

| Peak# | Ret. Time | Area     | Height | Area %  | Height % |
|-------|-----------|----------|--------|---------|----------|
| 1     | 16.566    | 31863574 | 542978 | 97.922  | 97.536   |
| 2     | 19.839    | 676141   | 13715  | 2.078   | 2.464    |
| Total |           | 32539715 | 556694 | 100.000 | 100.000  |

3f

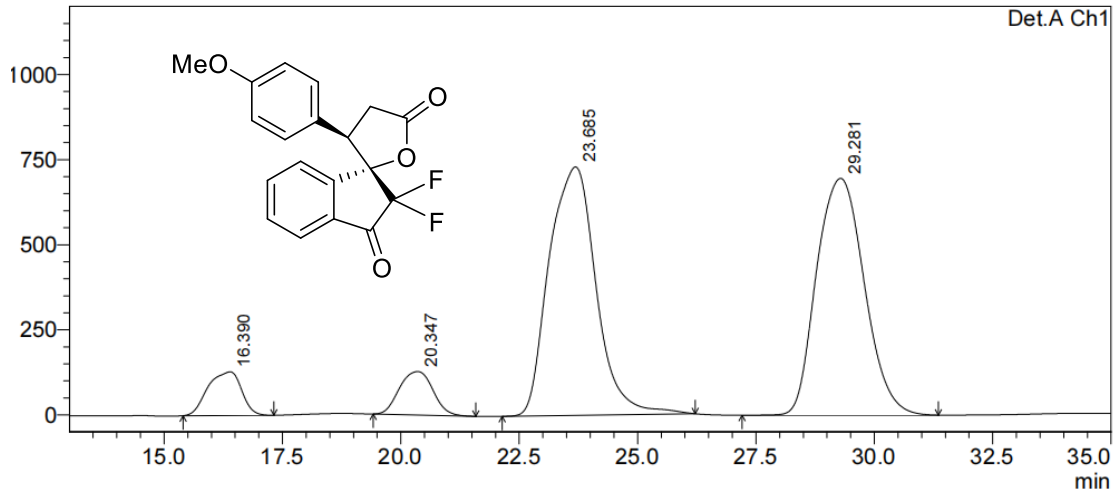

| Peak# | Ret. Time | Area      | Height  | Area %  | Height % |
|-------|-----------|-----------|---------|---------|----------|
| 1     | 16.390    | 6315382   | 128275  | 5.645   | 7.629    |
| 2     | 20.347    | 6293814   | 127618  | 5.626   | 7.590    |
| 3     | 23.685    | 50425190  | 729854  | 45.074  | 43.406   |
| 4     | 29.281    | 48836598  | 695719  | 43.654  | 41.376   |
| Total |           | 111870983 | 1681465 | 100.000 | 100.000  |

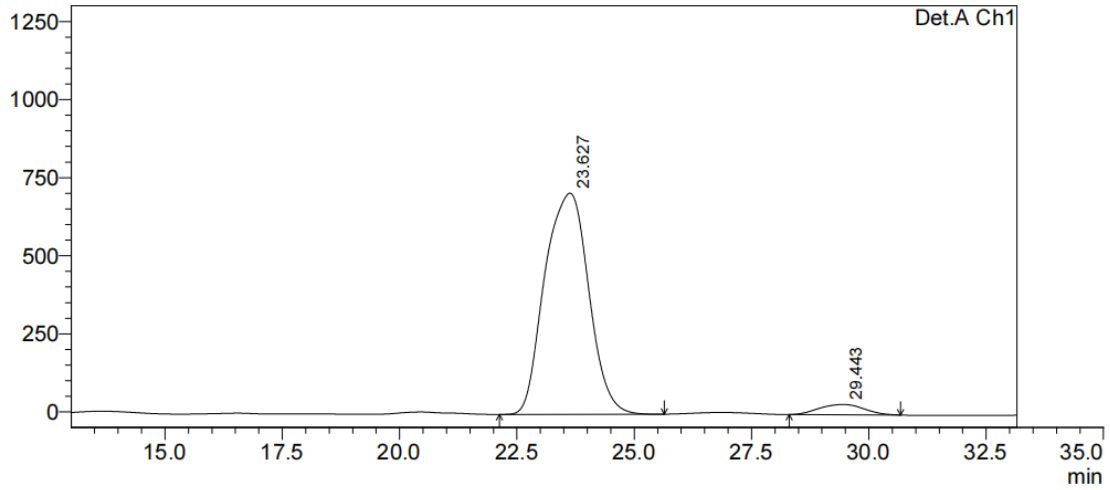

| Peak# | Ret. Time | Area     | Height | Area %  | Height % |
|-------|-----------|----------|--------|---------|----------|
| 1     | 23.627    | 46215890 | 708003 | 95.455  | 95.538   |
| 2     | 29.443    | 2200484  | 33066  | 4.545   | 4.462    |
| Total |           | 48416374 | 741069 | 100.000 | 100.000  |



3g

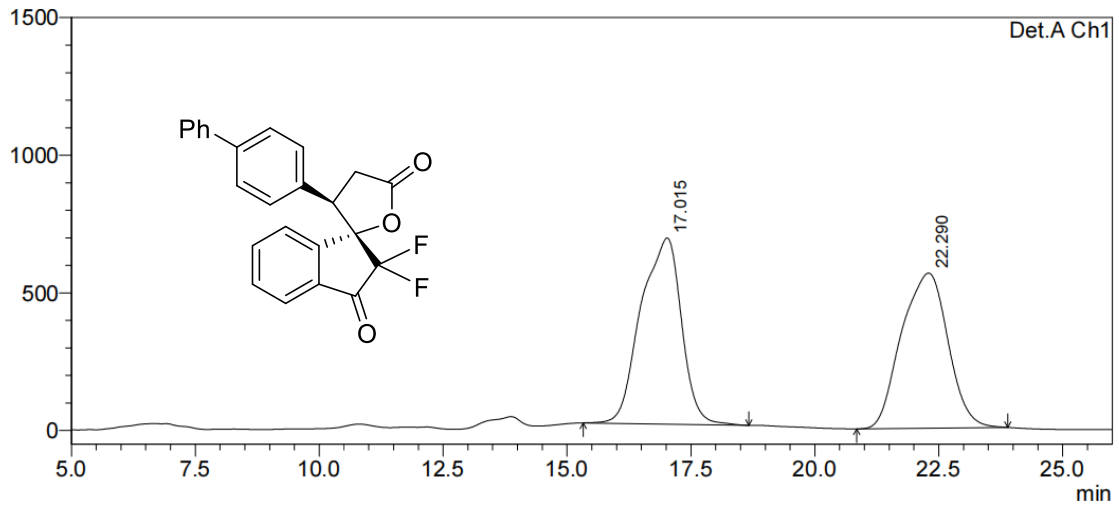

| Peak# | Ret. Time | Area     | Height  | Area %  | Height % |
|-------|-----------|----------|---------|---------|----------|
| 1     | 17.015    | 38491535 | 676507  | 51.131  | 54.552   |
| 2     | 22.290    | 36788947 | 563618  | 48.869  | 45.448   |
| Total |           | 75280483 | 1240126 | 100.000 | 100.000  |

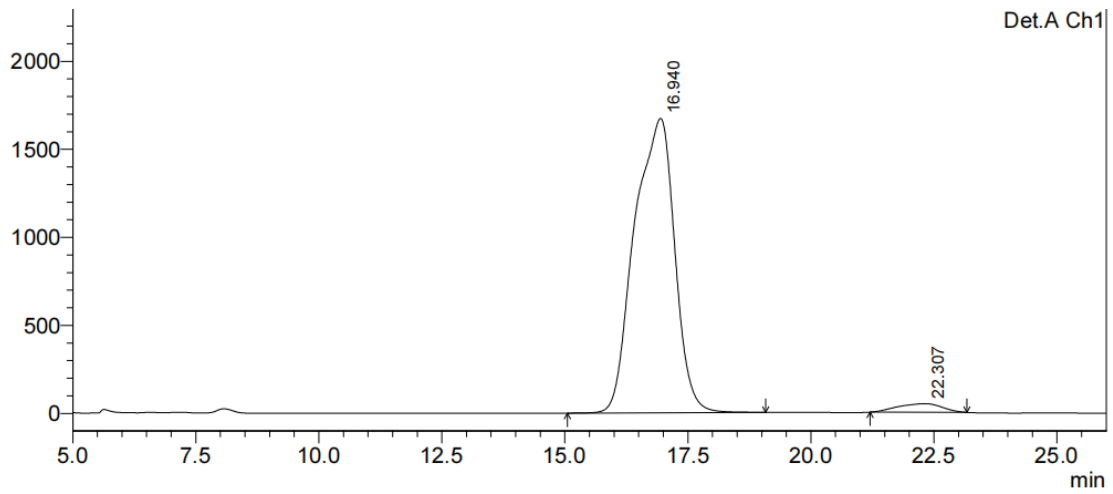

| Peak# | Ret. Time | Area     | Height  | Area %  | Height % |
|-------|-----------|----------|---------|---------|----------|
| 1     | 16.940    | 94868031 | 1672795 | 96.883  | 97.159   |
| 2     | 22.307    | 3052412  | 48921   | 3.117   | 2.841    |
| Total |           | 97920444 | 1721715 | 100.000 | 100.000  |

3h

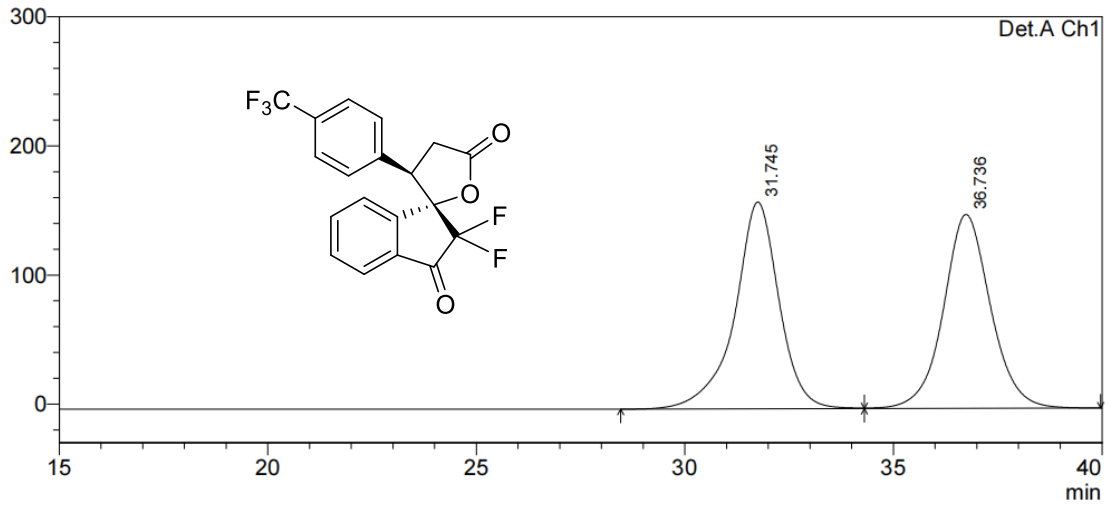

| Peak# | Ret. Time | Area     | Height | Area %  | Height % |
|-------|-----------|----------|--------|---------|----------|
| 1     | 31.745    | 11883464 | 160211 | 50.108  | 51.604   |
| 2     | 36.736    | 11832381 | 150250 | 49.892  | 48.396   |
| Total |           | 23715845 | 310460 | 100.000 | 100.000  |

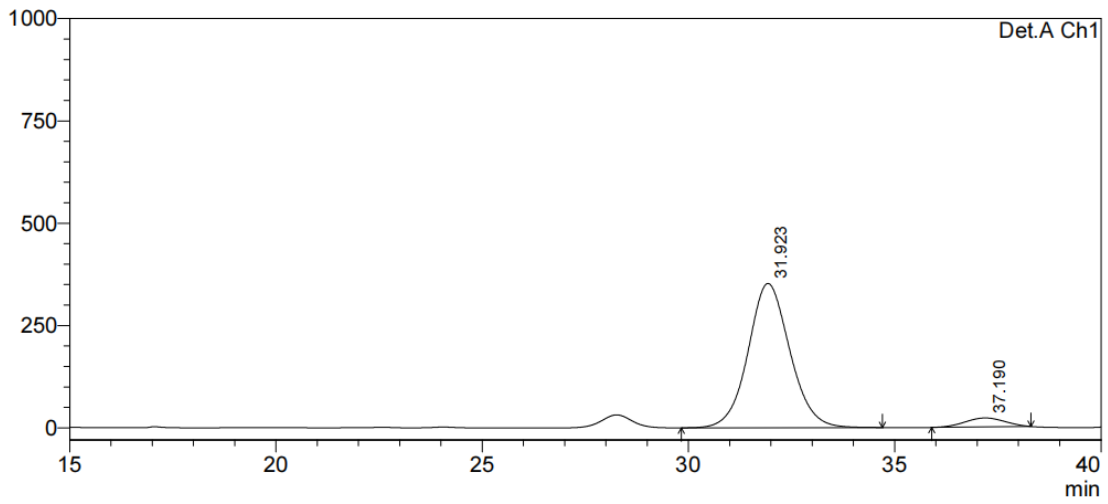

| Peak# | Ret. Time | Area     | Height | Area %  | Height % |
|-------|-----------|----------|--------|---------|----------|
| 1     | 31.923    | 24869296 | 352533 | 94.421  | 94.150   |
| 2     | 37.190    | 1469472  | 21906  | 5.579   | 5.850    |
| Total |           | 26338768 | 374438 | 100.000 | 100.000  |

3i

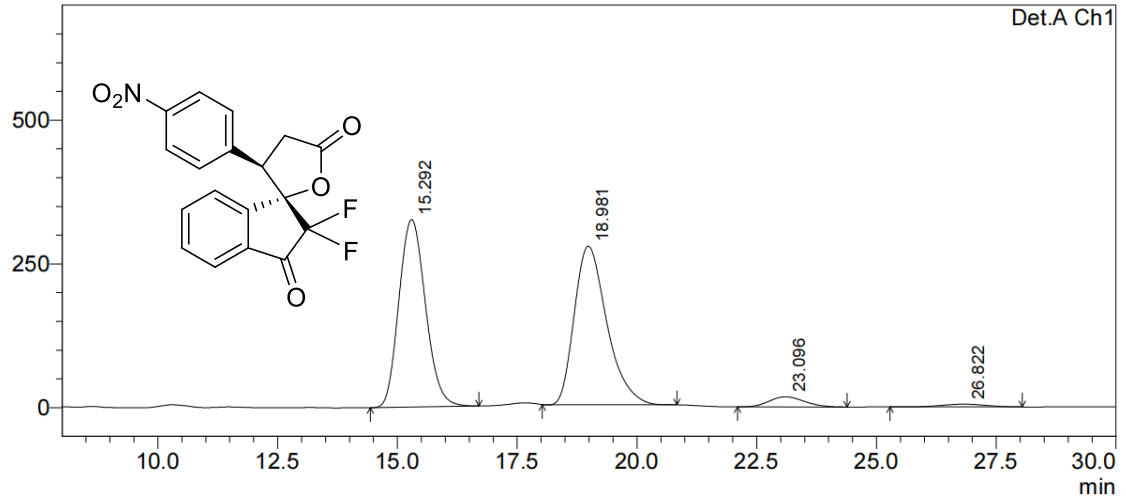

| Peak# | Ret. Time | Area     | Height | Area %  | Height % |
|-------|-----------|----------|--------|---------|----------|
| 1     | 15.292    | 12625336 | 326402 | 47.003  | 52.268   |
| 2     | 18.981    | 13032256 | 275718 | 48.518  | 44.152   |
| 3     | 23.096    | 905884   | 17624  | 3.373   | 2.822    |
| 4     | 26.822    | 297374   | 4729   | 1.107   | 0.757    |
| Total |           | 26860851 | 624473 | 100.000 | 100.000  |

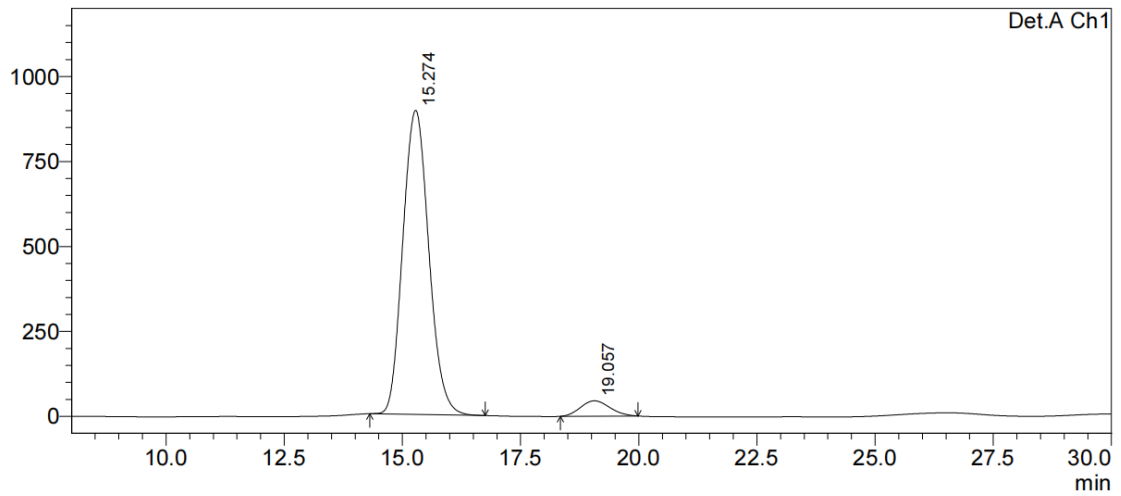

| Peak# | Ret. Time | Area     | Height | Area %  | Height % |
|-------|-----------|----------|--------|---------|----------|
| 1     | 15.274    | 34298763 | 894662 | 94.618  | 95.188   |
| 2     | 19.057    | 1950886  | 45229  | 5.382   | 4.812    |
| Total |           | 36249649 | 939892 | 100.000 | 100.000  |

3j

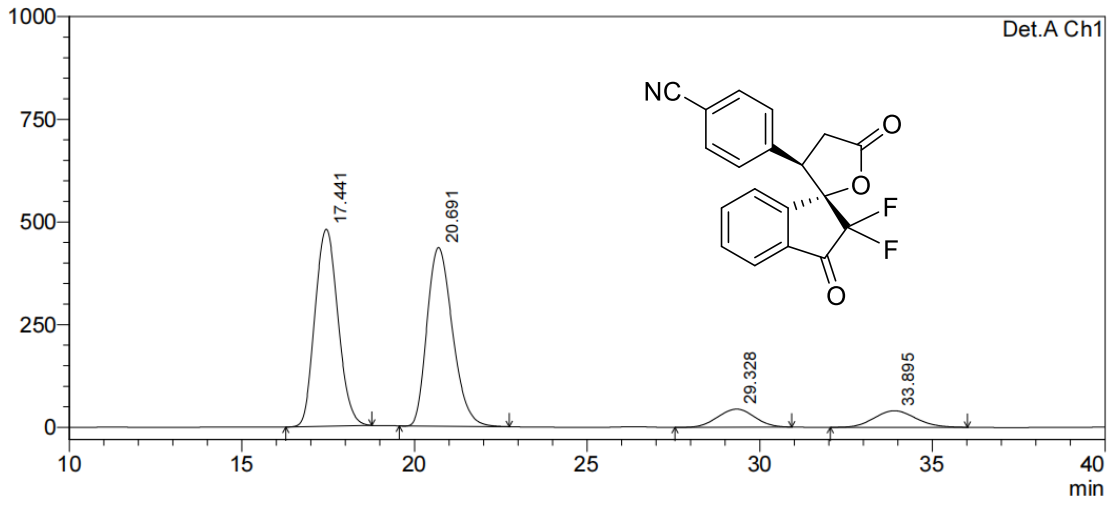

| Peak# | Ret. Time | Area     | Height | Area %  | Height % |
|-------|-----------|----------|--------|---------|----------|
| 1     | 17.441    | 22318893 | 479939 | 43.475  | 48.002   |
| 2     | 20.691    | 22353397 | 435442 | 43.542  | 43.552   |
| 3     | 29.328    | 3286130  | 44141  | 6.401   | 4.415    |
| 4     | 33.895    | 3379397  | 40304  | 6.583   | 4.031    |
| Total |           | 51337817 | 999826 | 100.000 | 100.000  |

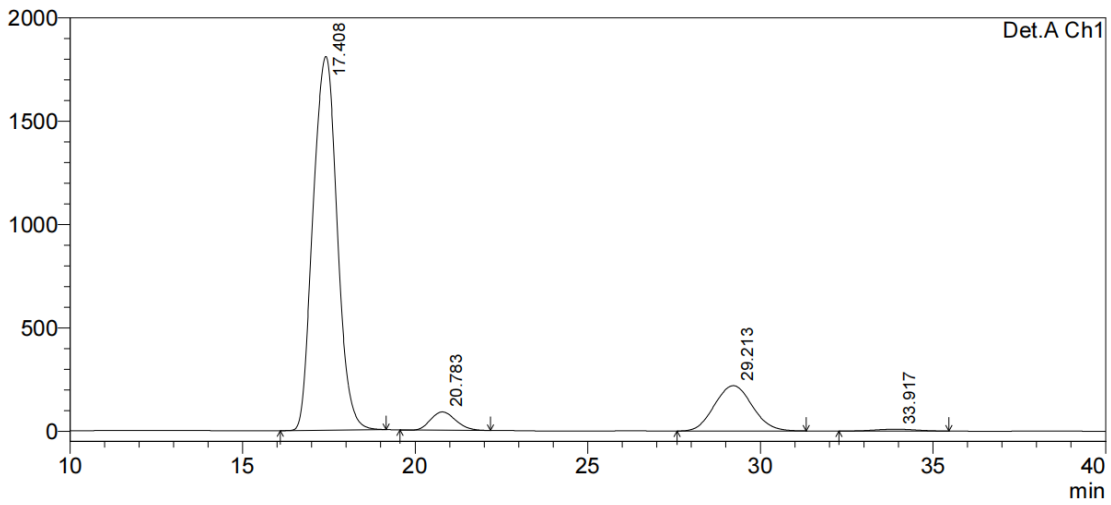

| Peak# | Ret. Time | Area      | Height  | Area %  | Height % |
|-------|-----------|-----------|---------|---------|----------|
| 1     | 17.408    | 87855464  | 1809210 | 80.055  | 85.101   |
| 2     | 20.783    | 4439636   | 88445   | 4.045   | 4.160    |
| 3     | 29.213    | 16708746  | 219248  | 15.225  | 10.313   |
| 4     | 33.917    | 740519    | 9056    | 0.675   | 0.426    |
| Total |           | 109744365 | 2125958 | 100.000 | 100.000  |

3k

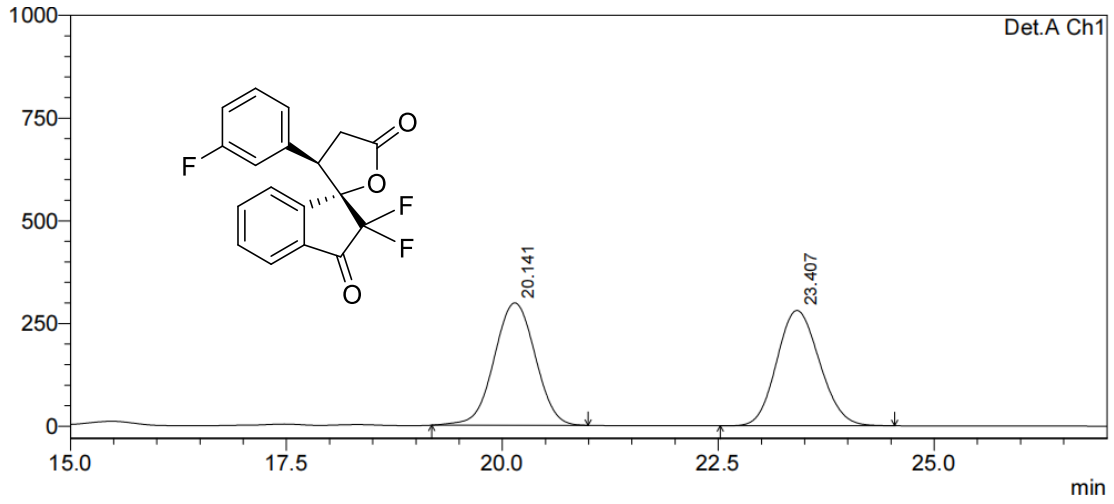

| Peak# | Ret. Time | Area     | Height | Area %  | Height % |
|-------|-----------|----------|--------|---------|----------|
| 1     | 20.141    | 9874816  | 298066 | 50.467  | 51.494   |
| 2     | 23.407    | 9692206  | 280774 | 49.533  | 48.506   |
| Total |           | 19567022 | 578839 | 100.000 | 100.000  |

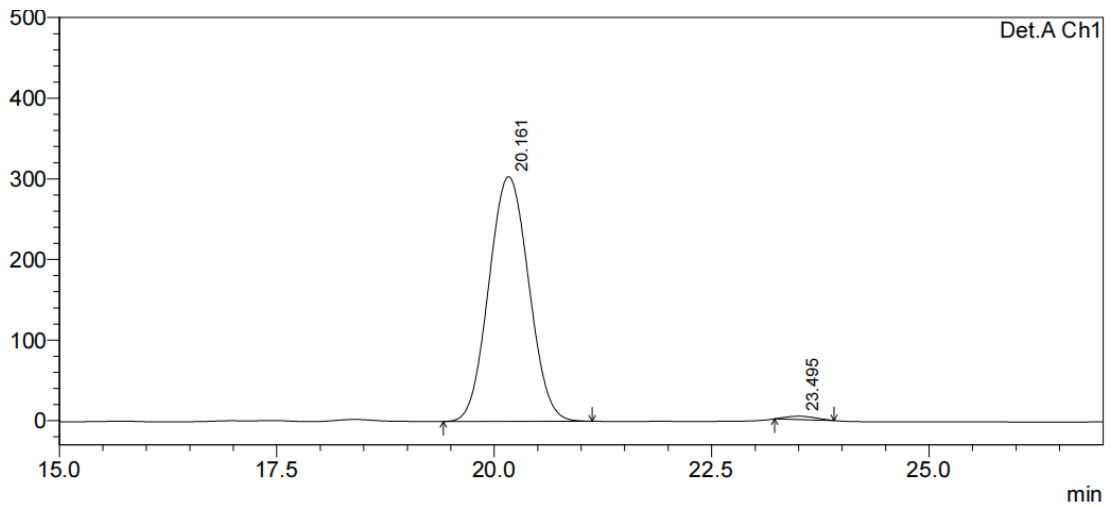

| Peak# | Ret. Time | Area    | Height | Area %  | Height % |
|-------|-----------|---------|--------|---------|----------|
| 1     | 20.161    | 9681038 | 303495 | 98.999  | 98.671   |
| 2     | 23.495    | 97884   | 4086   | 1.001   | 1.329    |
| Total |           | 9778922 | 307581 | 100.000 | 100.000  |

## 31

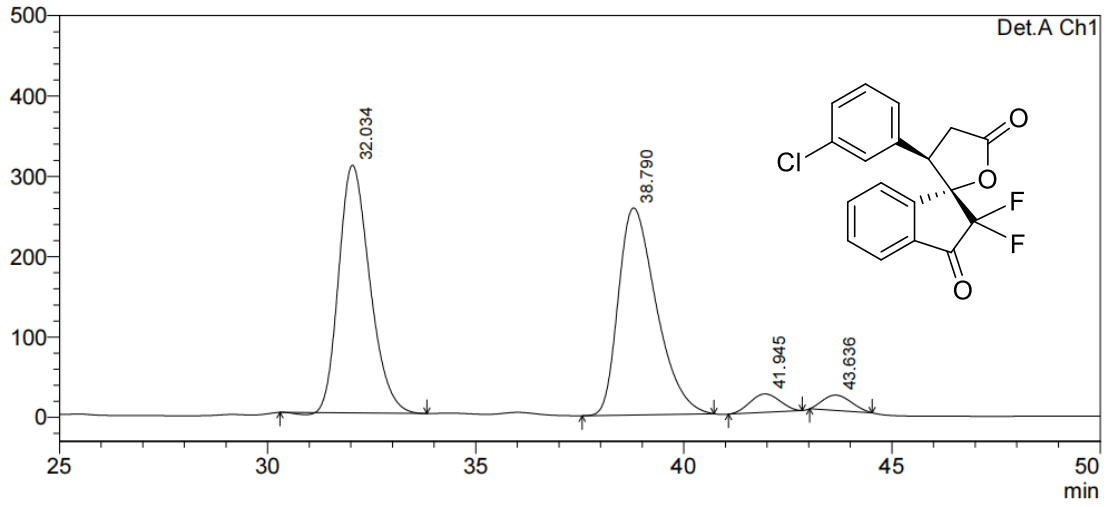

| Peak# | Ret. Time | Area     | Height | Area %  | Height % |
|-------|-----------|----------|--------|---------|----------|
| 1     | 32.034    | 15967380 | 308380 | 46.472  | 50.722   |
| 2     | 38.790    | 16339999 | 257701 | 47.556  | 42.387   |
| 3     | 41.945    | 1140760  | 22874  | 3.320   | 3.762    |
| 4     | 43.636    | 911293   | 19021  | 2.652   | 3.129    |
| Total |           | 34359433 | 607975 | 100.000 | 100.000  |

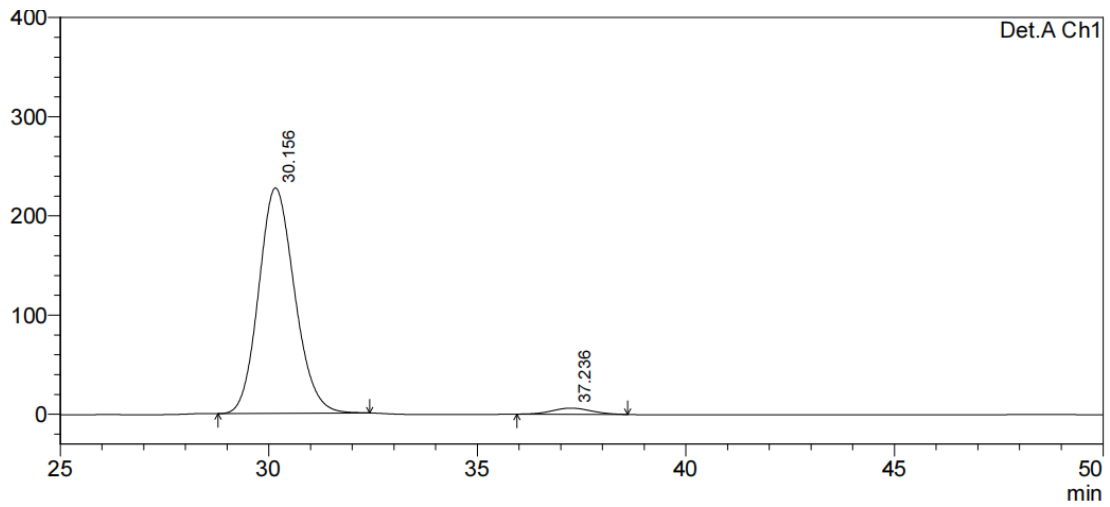

| Peak# | Ret. Time | Area     | Height | Area %  | Height % |
|-------|-----------|----------|--------|---------|----------|
| 1     | 30.156    | 13607735 | 227261 | 97.091  | 97.331   |
| 2     | 37.236    | 407719   | 6231   | 2.909   | 2.669    |
| Total |           | 14015454 | 233492 | 100.000 | 100.000  |

3m

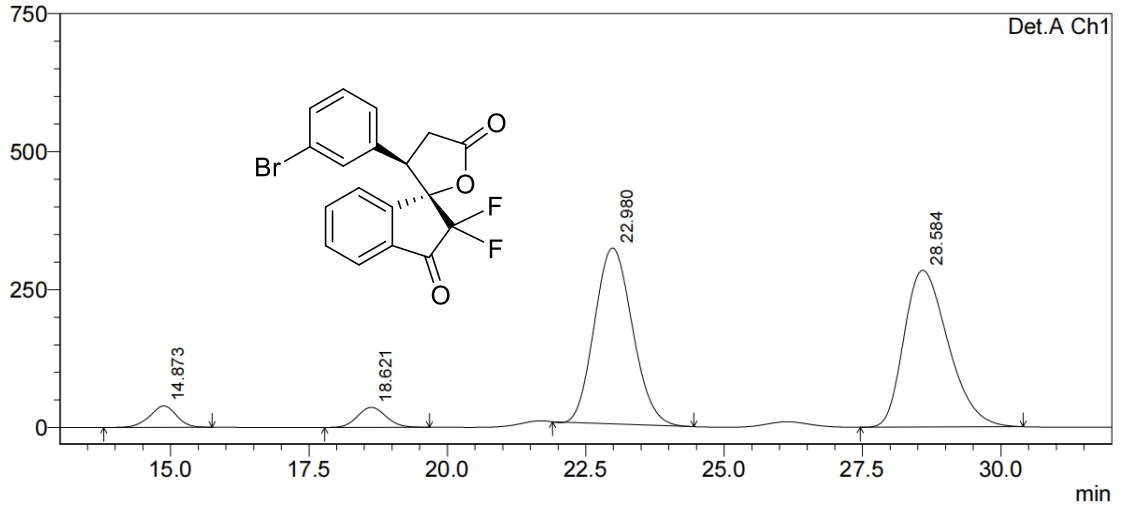

| Peak# | Ret. Time | Area     | Height | Area %  | Height % |
|-------|-----------|----------|--------|---------|----------|
| 1     | 14.873    | 1315800  | 38826  | 3.909   | 5.724    |
| 2     | 18.621    | 1306884  | 36416  | 3.883   | 5.368    |
| 3     | 22.980    | 15235459 | 318853 | 45.266  | 47.004   |
| 4     | 28.584    | 15799724 | 284251 | 46.942  | 41.904   |
| Total |           | 33657867 | 678345 | 100.000 | 100.000  |

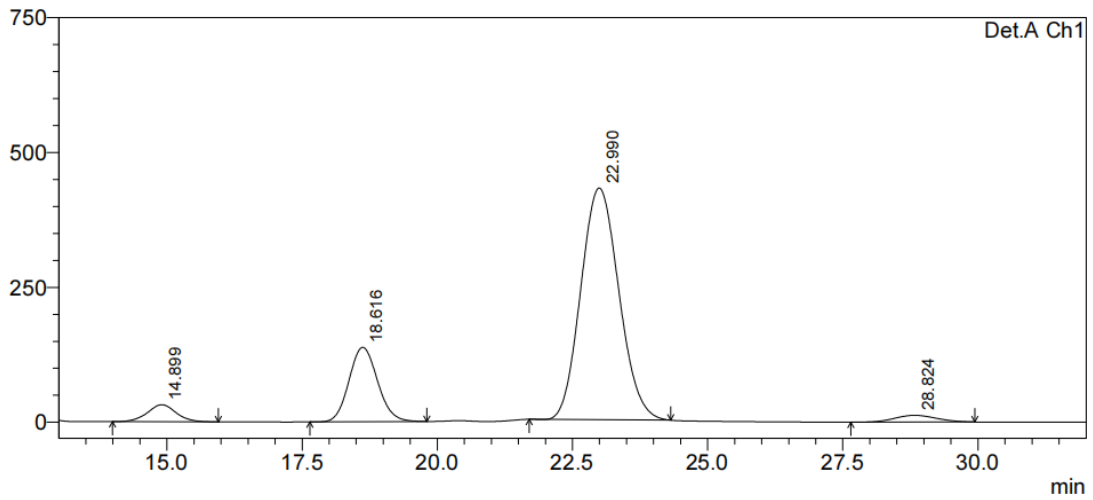

| Peak# | Ret. Time | Area     | Height | Area %  | Height % |
|-------|-----------|----------|--------|---------|----------|
| 1     | 14.899    | 1171635  | 31575  | 4.185   | 5.163    |
| 2     | 18.616    | 5069859  | 137966 | 18.110  | 22.561   |
| 3     | 22.990    | 21084618 | 429541 | 75.315  | 70.240   |
| 4     | 28.824    | 669147   | 12451  | 2.390   | 2.036    |
| Total |           | 27995260 | 611533 | 100.000 | 100.000  |

3n

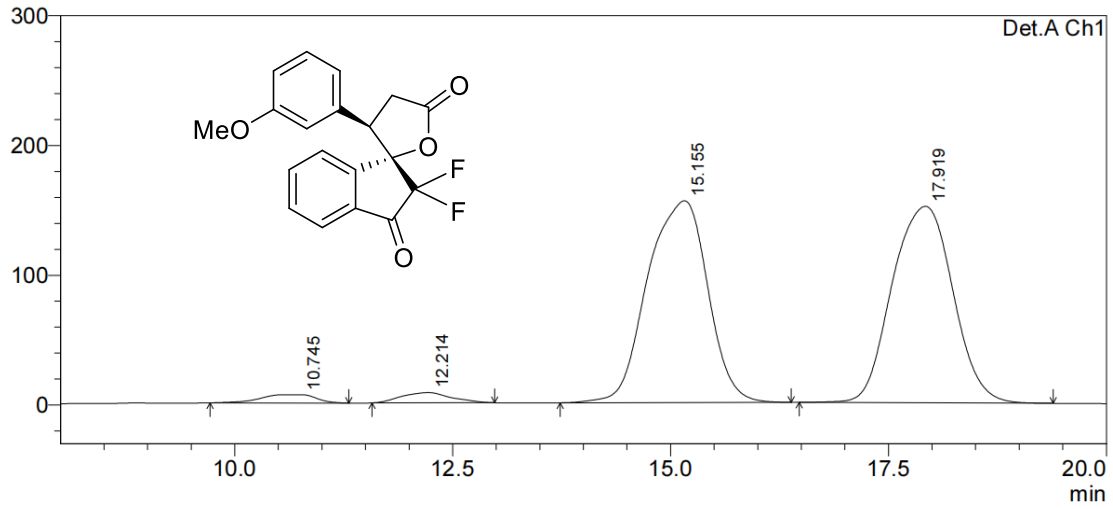

| Peak# | Ret. Time | Area     | Height | Area %  | Height % |
|-------|-----------|----------|--------|---------|----------|
| 1     | 10.745    | 279105   | 6372   | 1.808   | 1.983    |
| 2     | 12.214    | 312360   | 7902   | 2.024   | 2.459    |
| 3     | 15.155    | 7478779  | 155583 | 48.449  | 48.411   |
| 4     | 17.919    | 7366307  | 151520 | 47.720  | 47.147   |
| Total |           | 15436550 | 321377 | 100.000 | 100.000  |

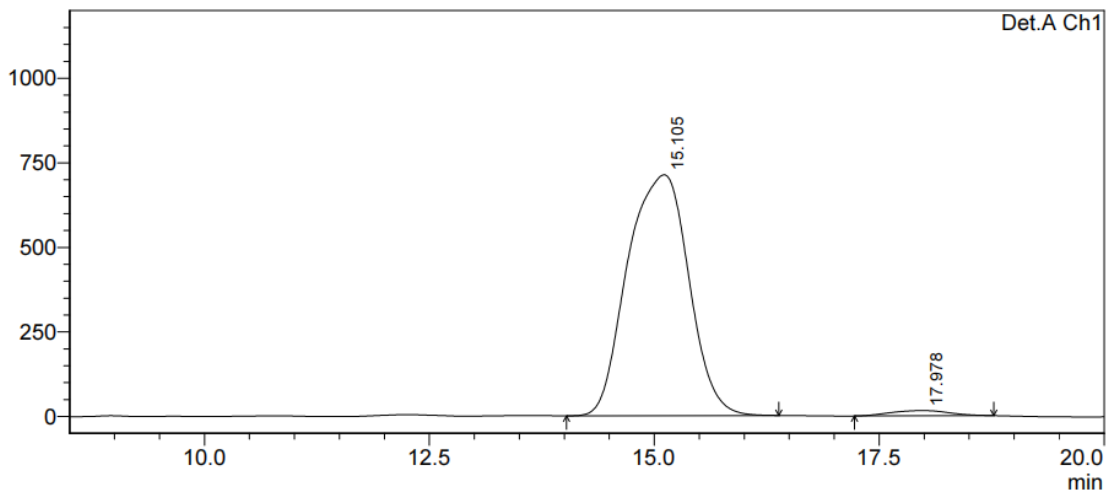

| Peak# | Ret. Time | Area     | Height | Area %  | Height % |
|-------|-----------|----------|--------|---------|----------|
| 1     | 15.105    | 33763376 | 712216 | 97.960  | 97.861   |
| 2     | 17.978    | 703088   | 15570  | 2.040   | 2.139    |
| Total |           | 34466464 | 727787 | 100.000 | 100.000  |



3o

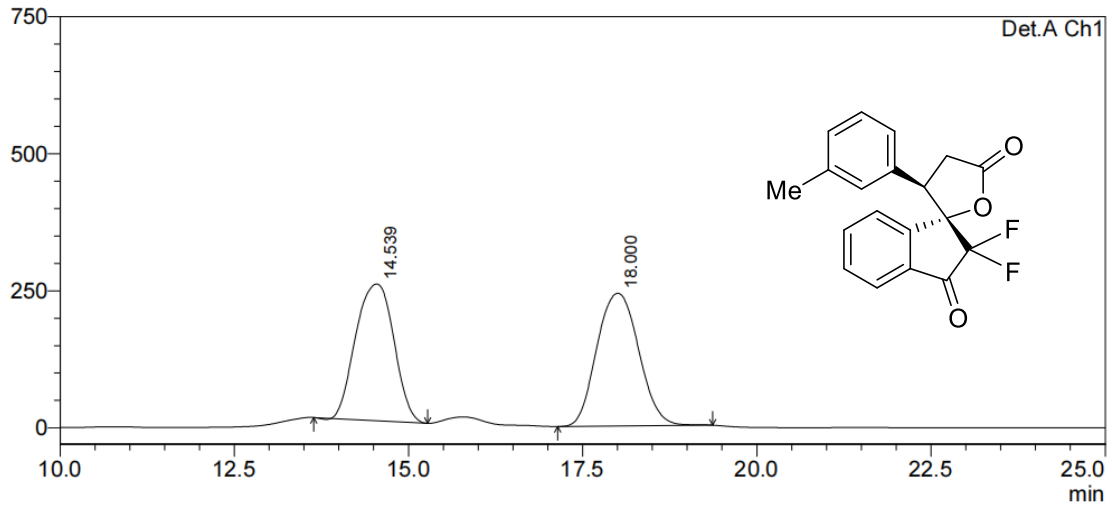

| Peak# | Ret. Time | Area     | Height | Area %  | Height % |
|-------|-----------|----------|--------|---------|----------|
| 1     | 14.539    | 9500554  | 249430 | 48.342  | 50.746   |
| 2     | 18.000    | 10152158 | 242096 | 51.658  | 49.254   |
| Total |           | 19652712 | 491526 | 100.000 | 100.000  |

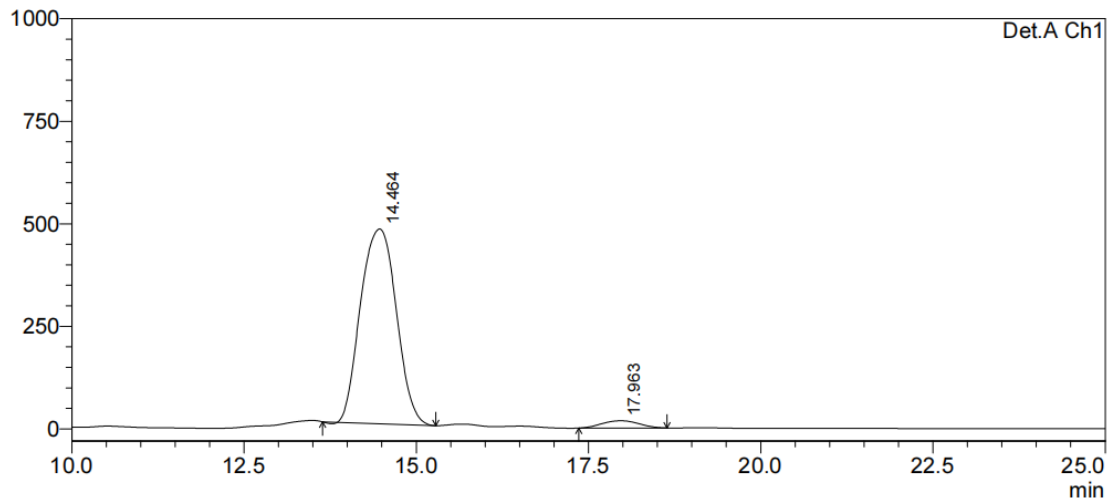

| Peak# | Ret. Time | Area     | Height | Area %  | Height % |
|-------|-----------|----------|--------|---------|----------|
| 1     | 14.464    | 17194368 | 475114 | 96.307  | 96.418   |
| 2     | 17.963    | 659328   | 17653  | 3.693   | 3.582    |
| Total |           | 17853695 | 492767 | 100.000 | 100.000  |

3p

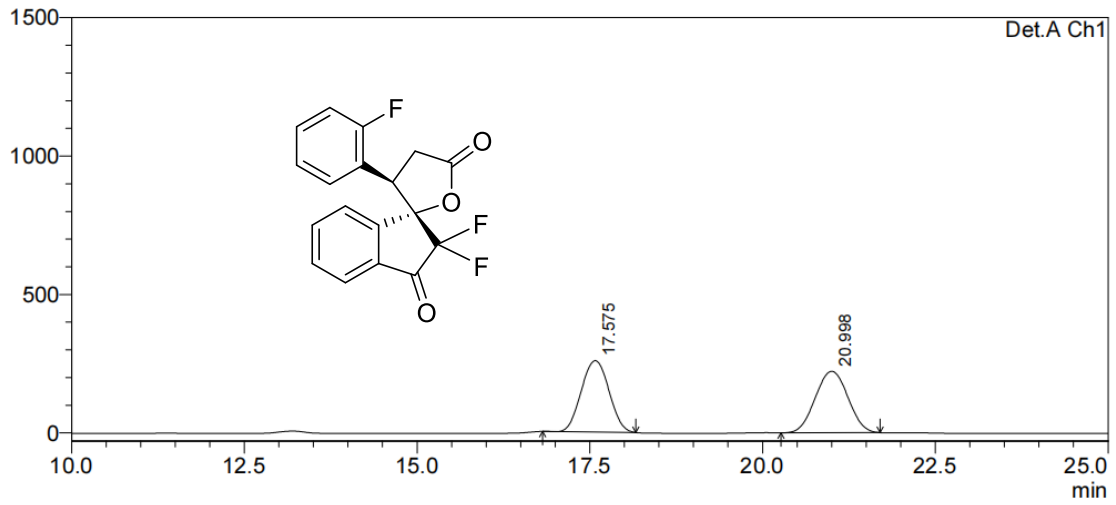

| Peak# | Ret. Time | Area     | Height | Area %  | Height % |
|-------|-----------|----------|--------|---------|----------|
| 1     | 17.575    | 7208230  | 258151 | 49.667  | 53.755   |
| 2     | 20.998    | 7305029  | 222086 | 50.333  | 46.245   |
| Total |           | 14513260 | 480237 | 100.000 | 100.000  |

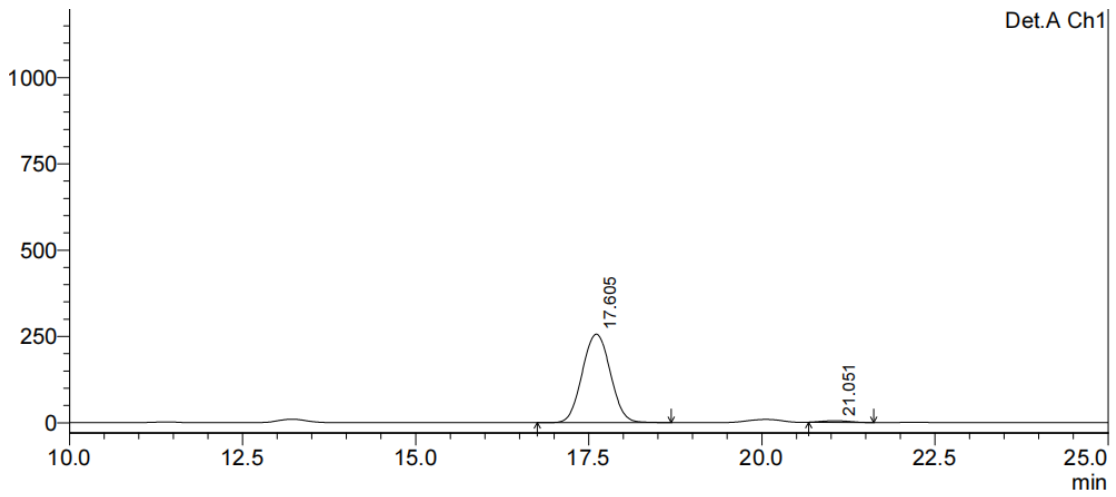

| Peak# | Ret. Time | Area    | Height | Area %  | Height % |
|-------|-----------|---------|--------|---------|----------|
| 1     | 17.605    | 7241720 | 256313 | 98.232  | 98.211   |
| 2     | 21.051    | 130318  | 4670   | 1.768   | 1.789    |
| Total |           | 7372037 | 260983 | 100.000 | 100.000  |

3q

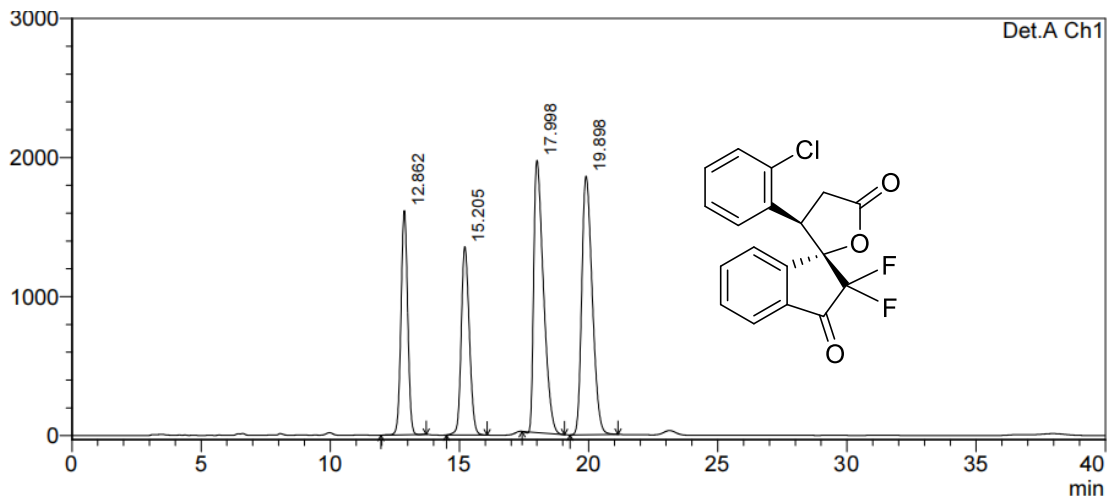

| Peak# | Ret. Time | Area      | Height  | Area %  | Height % |
|-------|-----------|-----------|---------|---------|----------|
| 1     | 12.862    | 28961247  | 1613444 | 17.862  | 23.773   |
| 2     | 15.205    | 29483837  | 1355190 | 18.184  | 19.968   |
| 3     | 17.998    | 51236523  | 1958613 | 31.600  | 28.859   |
| 4     | 19.898    | 52457477  | 1859704 | 32.353  | 27.401   |
| Total |           | 162139084 | 6786951 | 100.000 | 100.000  |

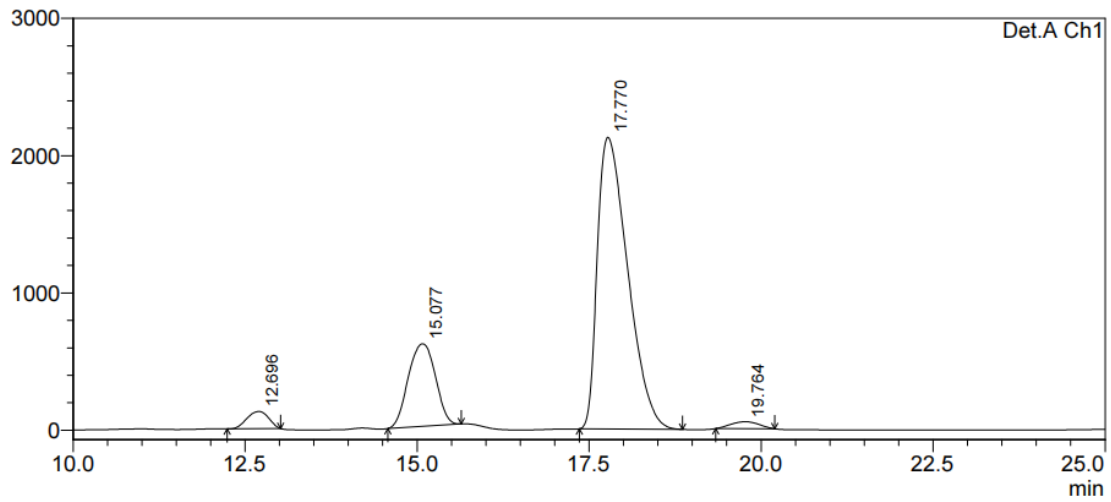

| Peak# | Ret. Time | Area     | Height  | Area %  | Height % |
|-------|-----------|----------|---------|---------|----------|
| 1     | 12.696    | 2749489  | 124771  | 3.198   | 4.299    |
| 2     | 15.077    | 16523369 | 601147  | 19.221  | 20.713   |
| 3     | 17.770    | 65248536 | 2125697 | 75.900  | 73.244   |
| 4     | 19.764    | 1445422  | 50601   | 1.681   | 1.744    |
| Total |           | 85966816 | 2902217 | 100.000 | 100.000  |

**3r**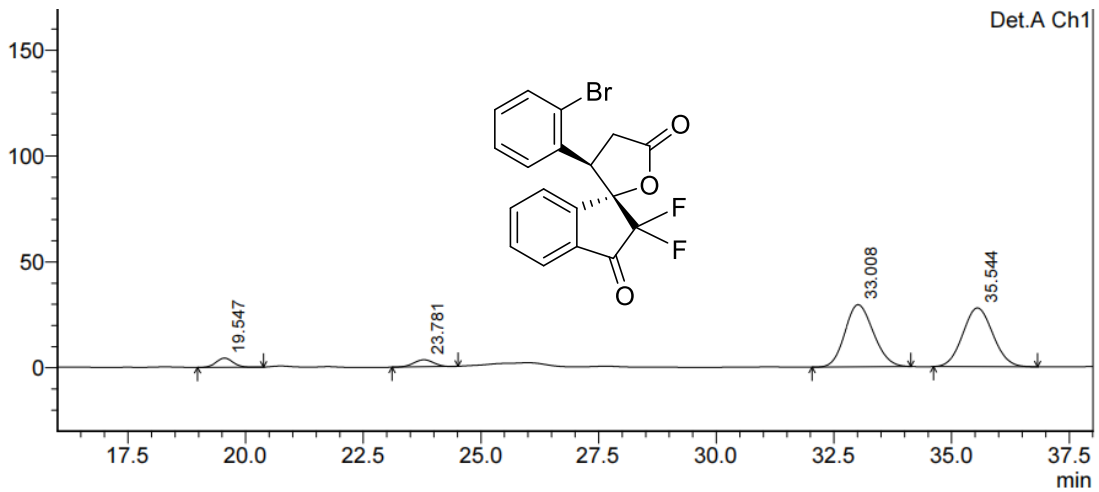

| Peak# | Ret. Time | Area    | Height | Area %  | Height % |
|-------|-----------|---------|--------|---------|----------|
| 1     | 19.547    | 106893  | 4344   | 3.991   | 6.702    |
| 2     | 23.781    | 95801   | 3313   | 3.577   | 5.112    |
| 3     | 33.008    | 1241228 | 29402  | 46.344  | 45.360   |
| 4     | 35.544    | 1234366 | 27759  | 46.088  | 42.826   |
| Total |           | 2678288 | 64819  | 100.000 | 100.000  |

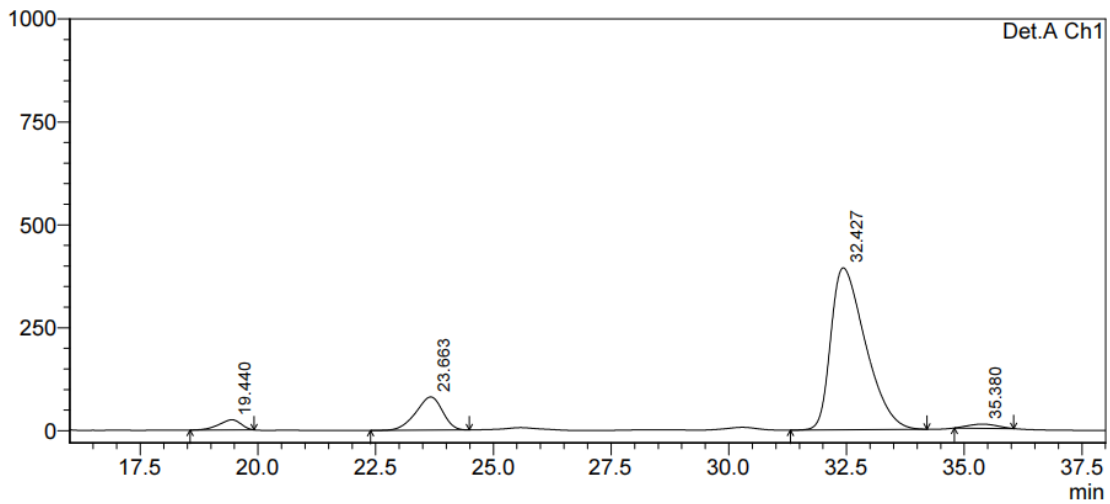

| Peak# | Ret. Time | Area     | Height | Area %  | Height % |
|-------|-----------|----------|--------|---------|----------|
| 1     | 19.440    | 803693   | 24735  | 3.269   | 4.860    |
| 2     | 23.663    | 3193420  | 80762  | 12.991  | 15.867   |
| 3     | 32.427    | 20164744 | 393555 | 82.030  | 77.321   |
| 4     | 35.380    | 420233   | 9936   | 1.710   | 1.952    |
| Total |           | 24582089 | 508989 | 100.000 | 100.000  |

3s

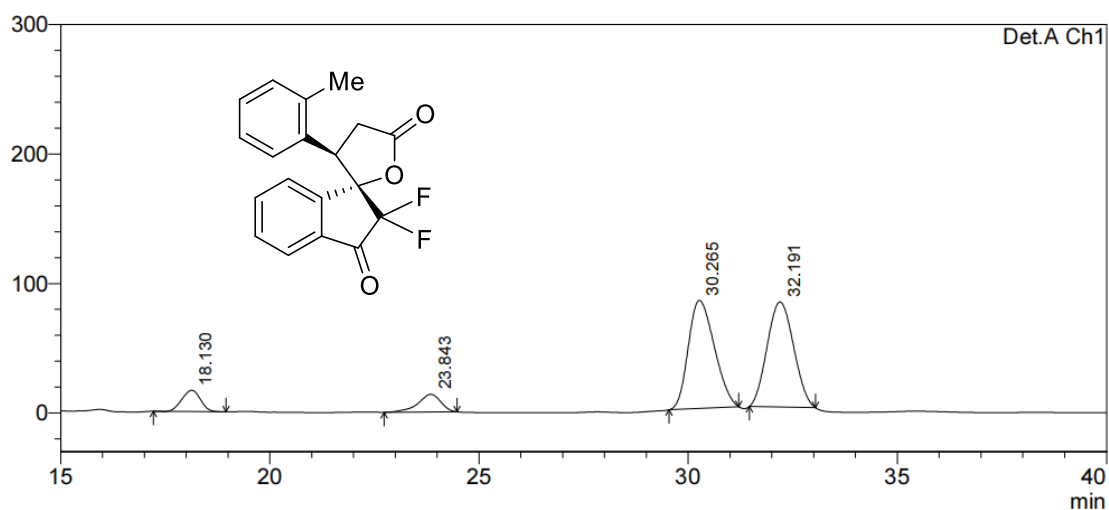

| Peak# | Ret. Time | Area    | Height | Area %  | Height % |
|-------|-----------|---------|--------|---------|----------|
| 1     | 18.130    | 509927  | 16468  | 6.200   | 8.453    |
| 2     | 23.843    | 518296  | 13664  | 6.302   | 7.014    |
| 3     | 30.265    | 3621636 | 83525  | 44.037  | 42.874   |
| 4     | 32.191    | 3574127 | 81158  | 43.460  | 41.659   |
| Total |           | 8223986 | 194814 | 100.000 | 100.000  |

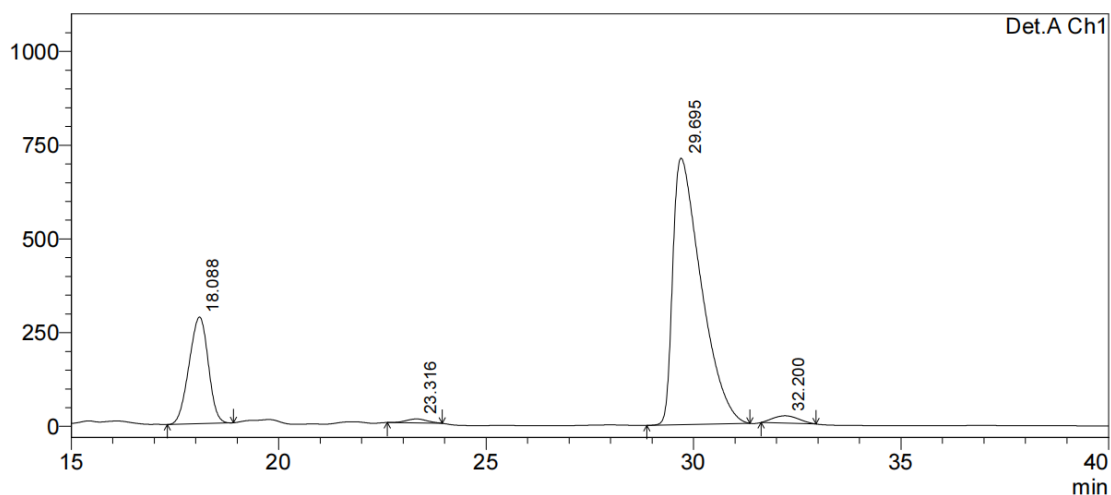

| Peak# | Ret. Time | Area     | Height  | Area %  | Height % |
|-------|-----------|----------|---------|---------|----------|
| 1     | 18.088    | 9166165  | 284697  | 20.670  | 27.738   |
| 2     | 23.316    | 375850   | 10625   | 0.848   | 1.035    |
| 3     | 29.695    | 33947759 | 711372  | 76.553  | 69.309   |
| 4     | 32.200    | 855864   | 19677   | 1.930   | 1.917    |
| Total |           | 44345638 | 1026371 | 100.000 | 100.000  |

3t

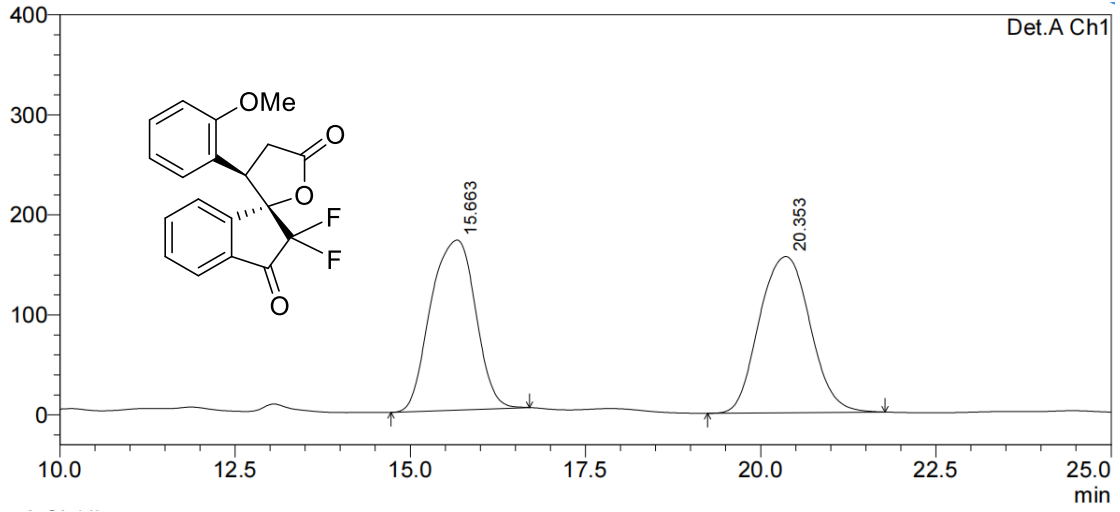

| Peak# | Ret. Time | Area     | Height | Area %  | Height % |
|-------|-----------|----------|--------|---------|----------|
| 1     | 15.663    | 7580426  | 170032 | 49.044  | 52.120   |
| 2     | 20.353    | 7875831  | 156197 | 50.956  | 47.880   |
| Total |           | 15456257 | 326230 | 100.000 | 100.000  |

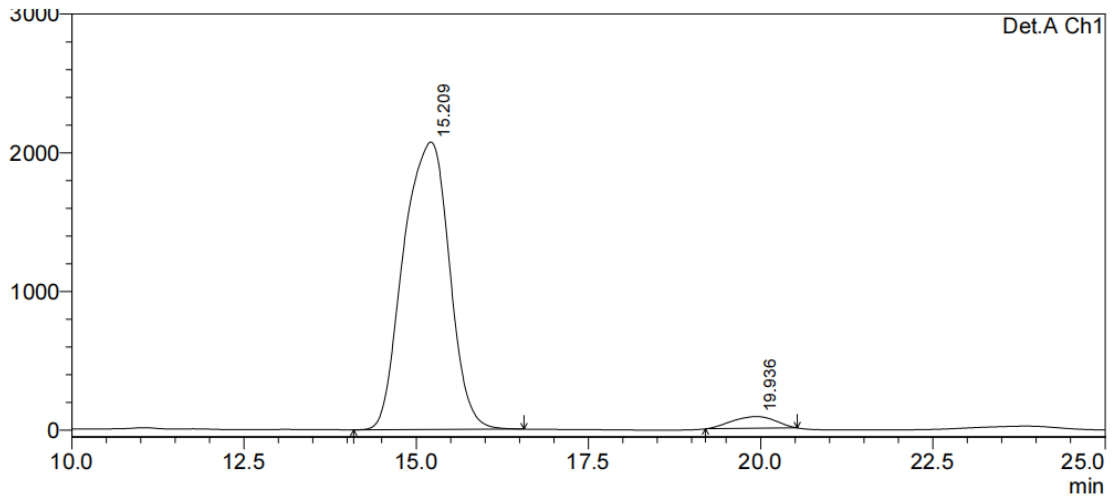

| Peak# | Ret. Time | Area     | Height  | Area %  | Height % |
|-------|-----------|----------|---------|---------|----------|
| 1     | 15.209    | 96148794 | 2072720 | 96.243  | 96.077   |
| 2     | 19.936    | 3753800  | 84638   | 3.757   | 3.923    |
| Total |           | 99902594 | 2157358 | 100.000 | 100.000  |

3u

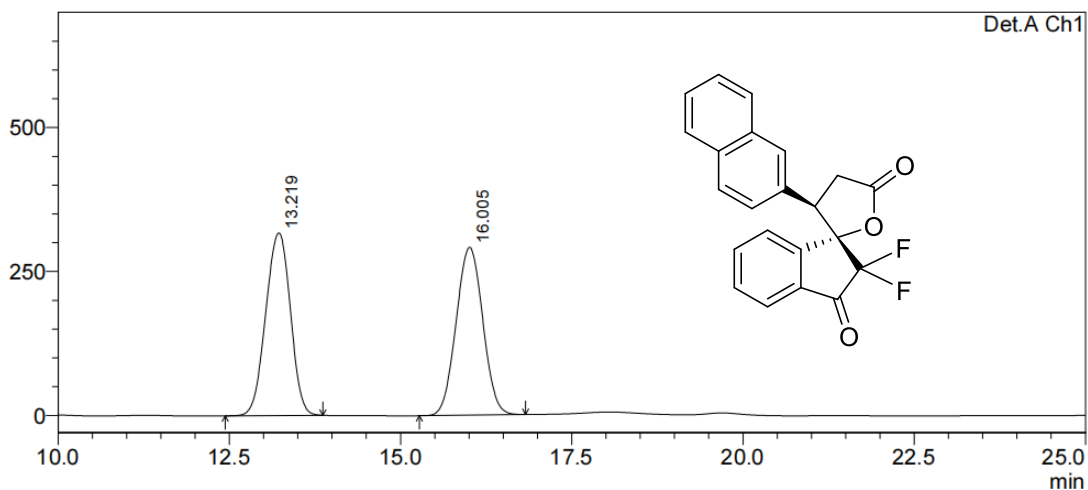

| Peak# | Ret. Time | Area     | Height | Area %  | Height % |
|-------|-----------|----------|--------|---------|----------|
| 1     | 13.219    | 7946448  | 317049 | 50.138  | 52.102   |
| 2     | 16.005    | 7902856  | 291464 | 49.862  | 47.898   |
| Total |           | 15849304 | 608513 | 100.000 | 100.000  |

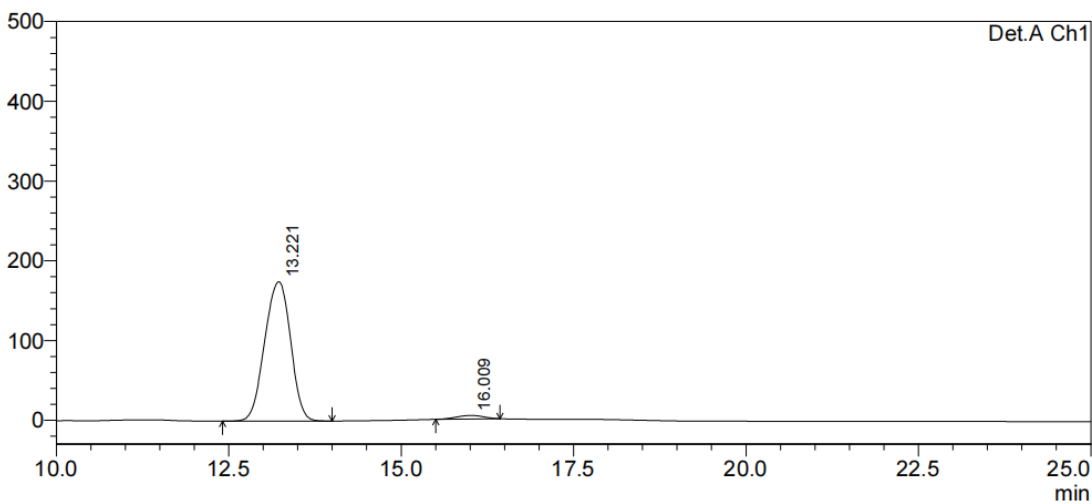

| Peak# | Ret. Time | Area    | Height | Area %  | Height % |
|-------|-----------|---------|--------|---------|----------|
| 1     | 13.221    | 4577208 | 174699 | 97.422  | 97.516   |
| 2     | 16.009    | 121114  | 4449   | 2.578   | 2.484    |
| Total |           | 4698322 | 179148 | 100.000 | 100.000  |

3v

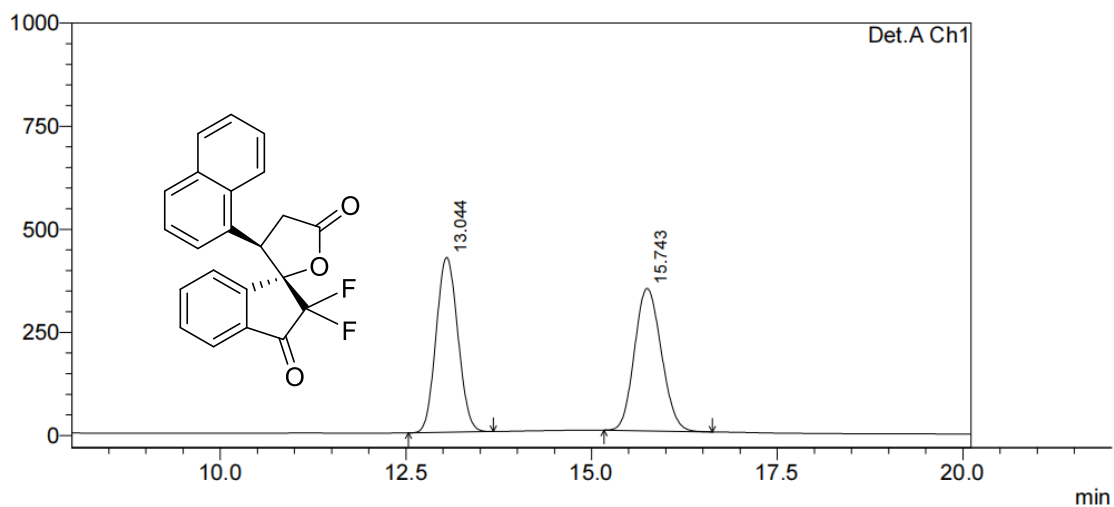

| Peak# | Ret. Time | Area     | Height | Area %  | Height % |
|-------|-----------|----------|--------|---------|----------|
| 1     | 13.044    | 8656502  | 424415 | 49.886  | 55.131   |
| 2     | 15.743    | 8696175  | 345412 | 50.114  | 44.869   |
| Total |           | 17352677 | 769827 | 100.000 | 100.000  |

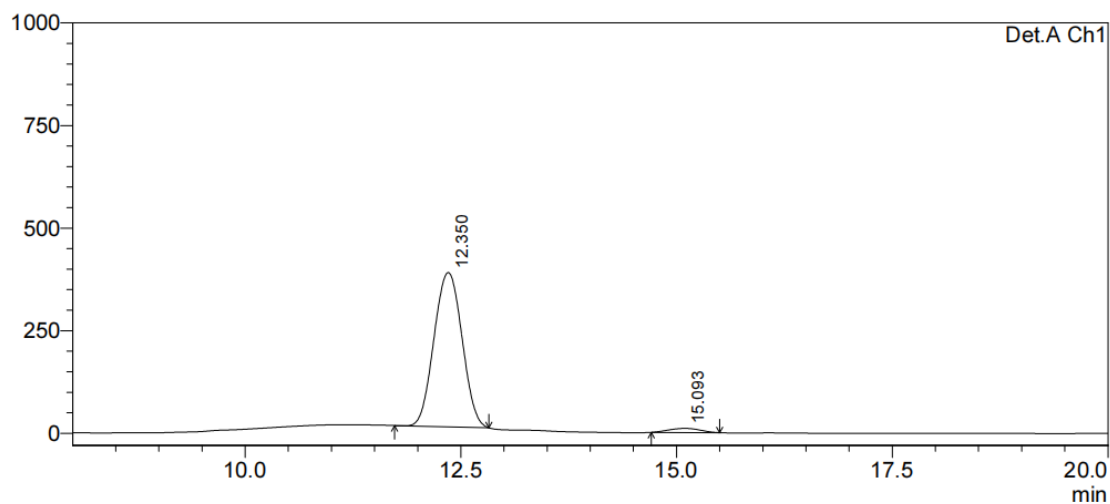

| Peak# | Ret. Time | Area    | Height | Area %  | Height % |
|-------|-----------|---------|--------|---------|----------|
| 1     | 12.350    | 8507509 | 376233 | 97.118  | 97.389   |
| 2     | 15.093    | 252505  | 10086  | 2.882   | 2.611    |
| Total |           | 8760014 | 386319 | 100.000 | 100.000  |



3w

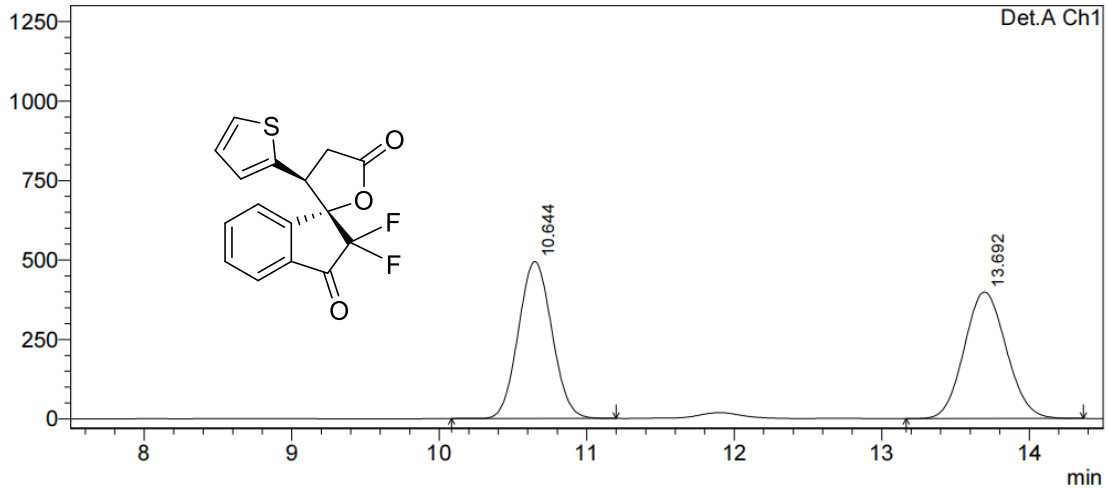

| Peak# | Ret. Time | Area     | Height | Area %  | Height % |
|-------|-----------|----------|--------|---------|----------|
| 1     | 10.644    | 7811573  | 493441 | 49.720  | 55.350   |
| 2     | 13.692    | 7899470  | 398051 | 50.280  | 44.650   |
| Total |           | 15711043 | 891492 | 100.000 | 100.000  |

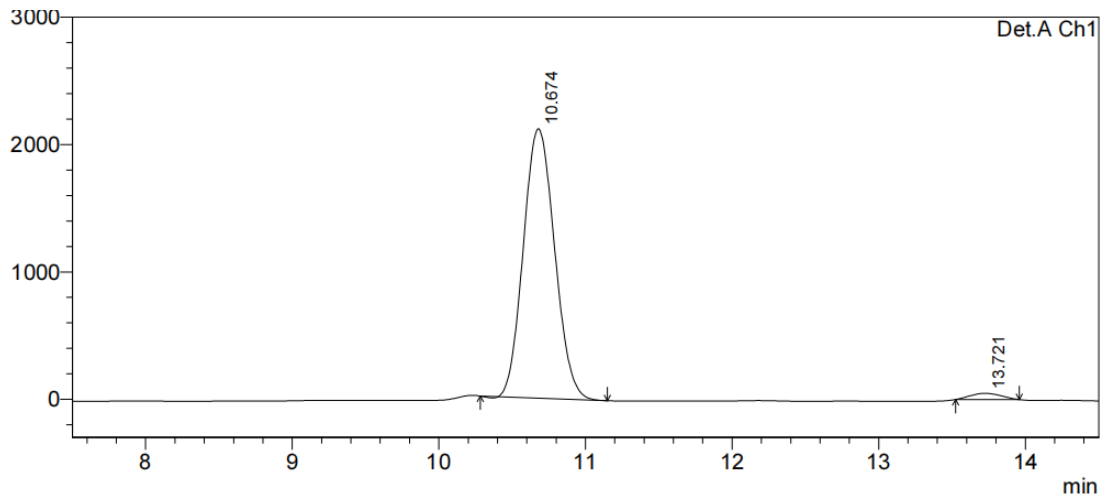

| Peak# | Ret. Time | Area     | Height  | Area %  | Height % |
|-------|-----------|----------|---------|---------|----------|
| 1     | 10.674    | 31338409 | 2115900 | 97.823  | 97.766   |
| 2     | 13.721    | 697554   | 48357   | 2.177   | 2.234    |
| Total |           | 32035962 | 2164257 | 100.000 | 100.000  |

3x

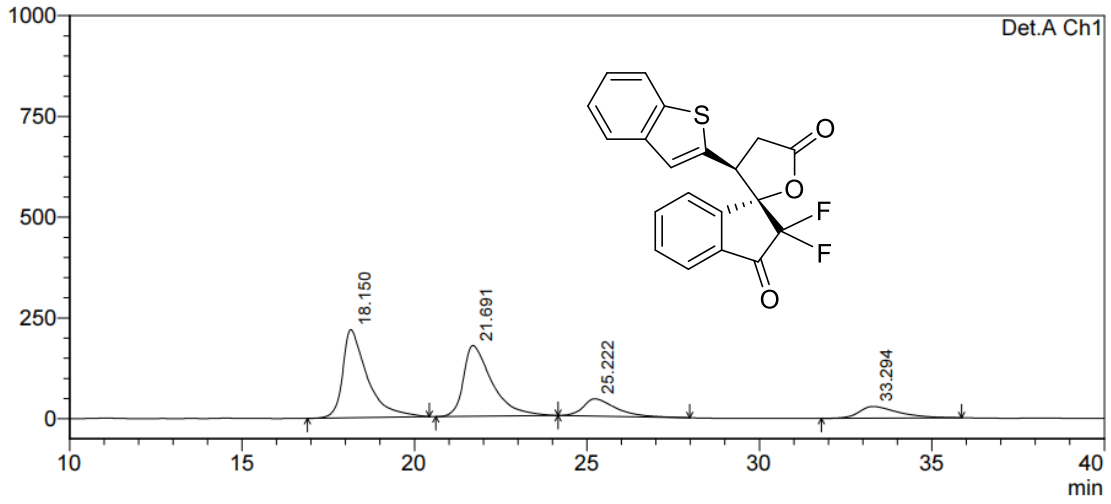

| Peak# | Ret. Time | Area     | Height | Area %  | Height % |
|-------|-----------|----------|--------|---------|----------|
| 1     | 18.150    | 10827639 | 218737 | 41.561  | 46.853   |
| 2     | 21.691    | 10100054 | 176105 | 38.769  | 37.722   |
| 3     | 25.222    | 2826814  | 42966  | 10.851  | 9.203    |
| 4     | 33.294    | 2297590  | 29045  | 8.819   | 6.221    |
| Total |           | 26052097 | 466854 | 100.000 | 100.000  |

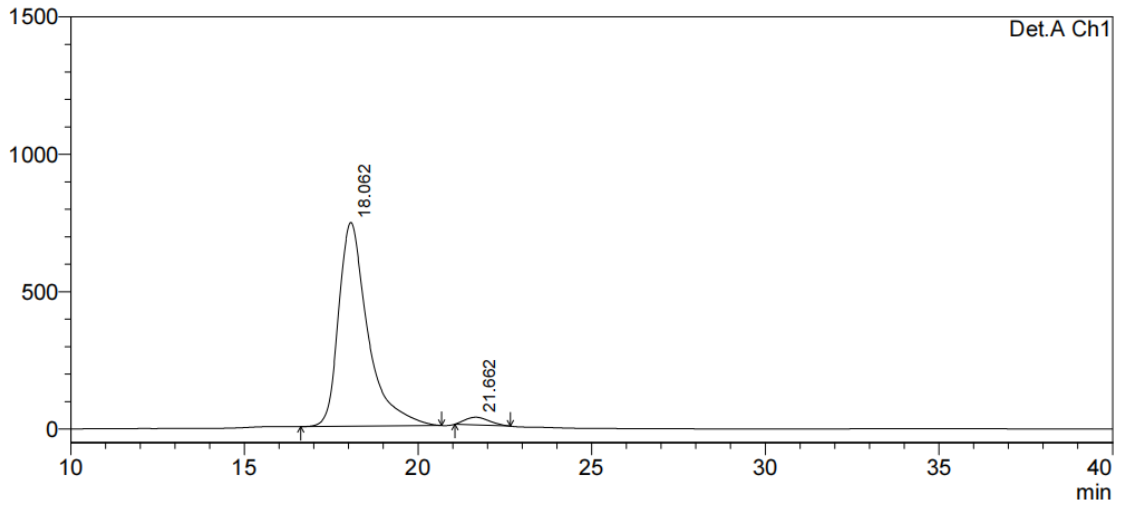

| Peak# | Ret. Time | Area     | Height | Area %  | Height % |
|-------|-----------|----------|--------|---------|----------|
| 1     | 18.062    | 43510809 | 741951 | 96.971  | 96.362   |
| 2     | 21.662    | 1359133  | 28009  | 3.029   | 3.638    |
| Total |           | 44869942 | 769960 | 100.000 | 100.000  |

3y

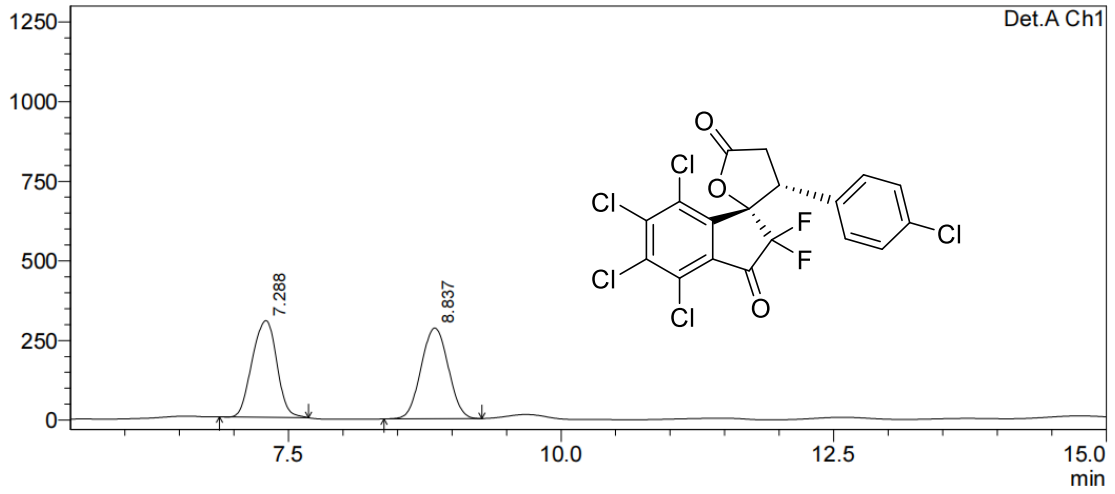

| Peak# | Ret. Time | Area    | Height | Area %  | Height % |
|-------|-----------|---------|--------|---------|----------|
| 1     | 7.288     | 4780647 | 303990 | 49.165  | 51.628   |
| 2     | 8.837     | 4943092 | 284822 | 50.835  | 48.372   |
| Total |           | 9723739 | 588813 | 100.000 | 100.000  |

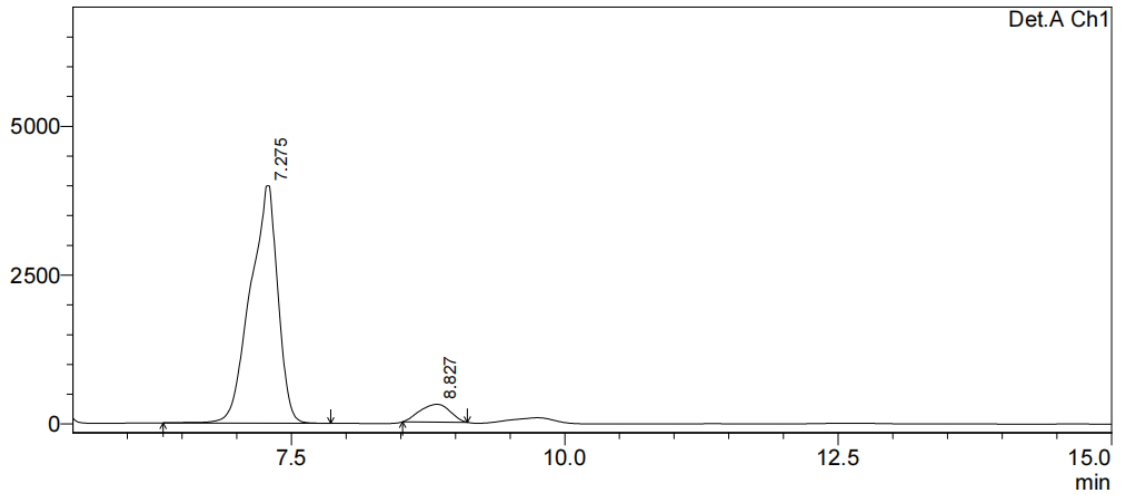

| Peak# | Ret. Time | Area     | Height  | Area %  | Height % |
|-------|-----------|----------|---------|---------|----------|
| 1     | 7.275     | 69976967 | 3985585 | 92.430  | 93.040   |
| 2     | 8.827     | 5731275  | 298164  | 7.570   | 6.960    |
| Total |           | 75708242 | 4283749 | 100.000 | 100.000  |

6

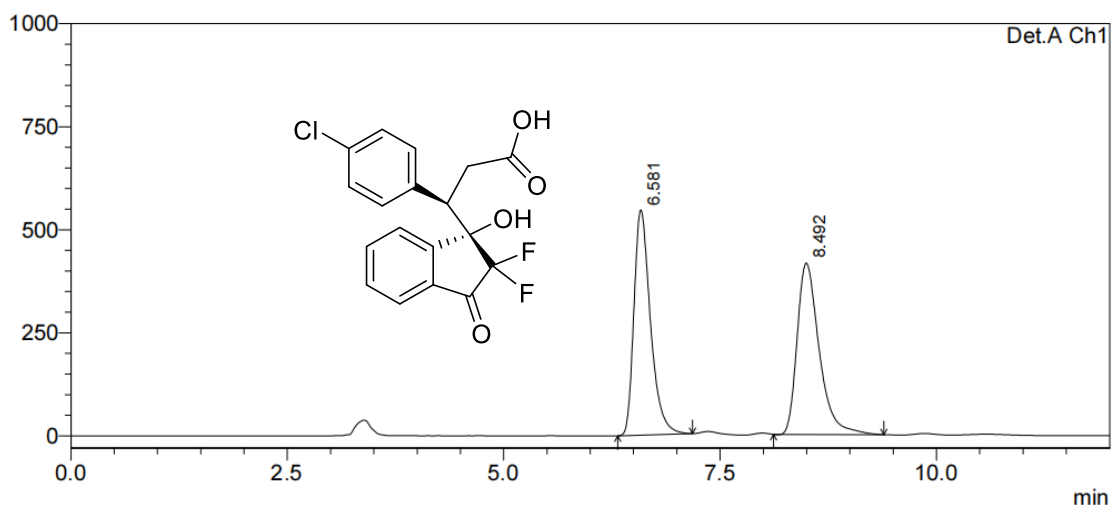

| Peak# | Ret. Time | Area     | Height | Area %  | Height % |
|-------|-----------|----------|--------|---------|----------|
| 1     | 6.581     | 7254233  | 546695 | 49.521  | 56.806   |
| 2     | 8.492     | 7394562  | 415700 | 50.479  | 43.194   |
| Total |           | 14648794 | 962395 | 100.000 | 100.000  |

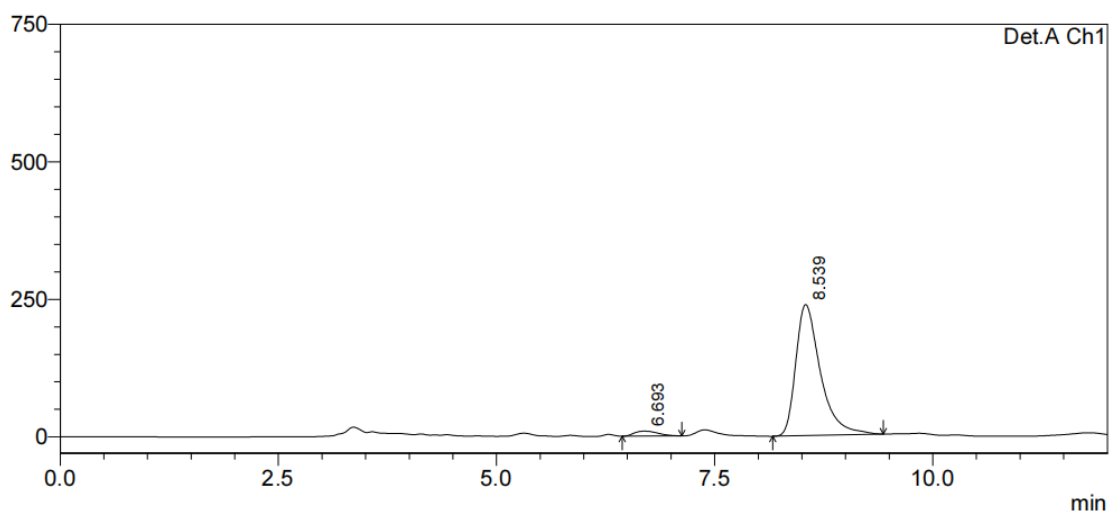

| Peak# | Ret. Time | Area    | Height | Area %  | Height % |
|-------|-----------|---------|--------|---------|----------|
| 1     | 6.693     | 172406  | 9027   | 3.542   | 3.646    |
| 2     | 8.539     | 4695735 | 238525 | 96.458  | 96.354   |
| Total |           | 4868141 | 247552 | 100.000 | 100.000  |

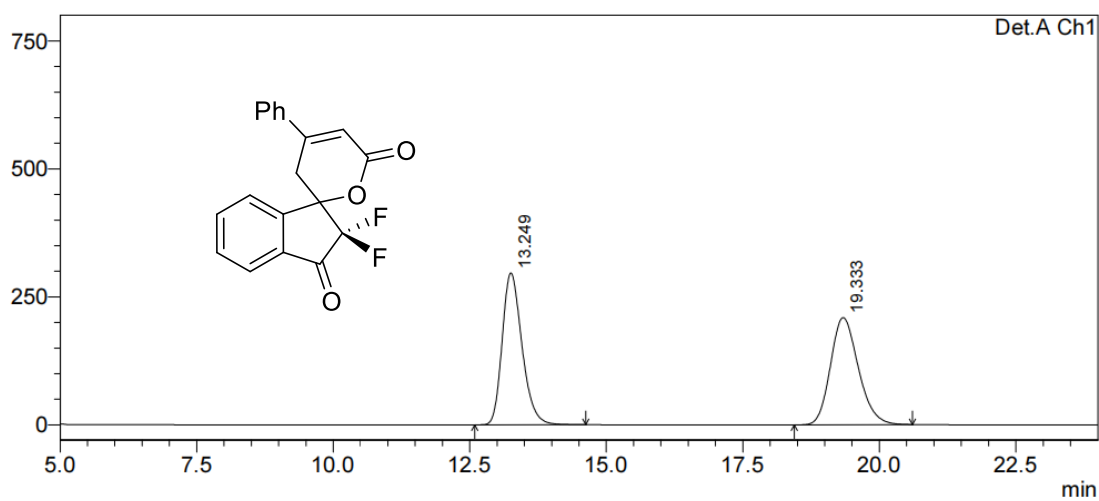

| Peak# | Ret. Time | Area     | Height | Area %  | Height % |
|-------|-----------|----------|--------|---------|----------|
| 1     | 13.249    | 7494206  | 296578 | 50.180  | 58.623   |
| 2     | 19.333    | 7440563  | 209333 | 49.820  | 41.377   |
| Total |           | 14934770 | 505910 | 100.000 | 100.000  |

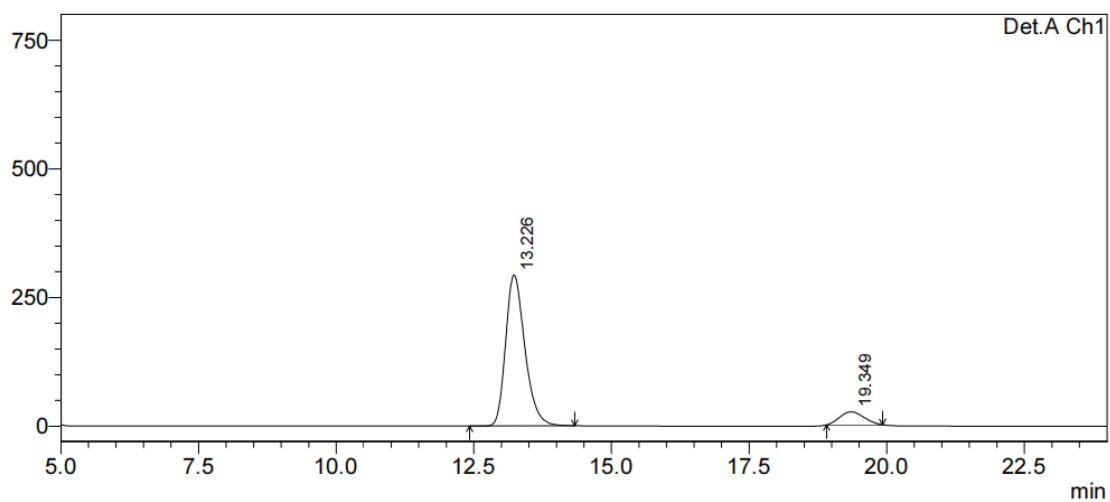

| Peak# | Ret. Time | Area    | Height | Area %  | Height % |
|-------|-----------|---------|--------|---------|----------|
| 1     | 13.226    | 7142170 | 293484 | 90.352  | 92.121   |
| 2     | 19.349    | 762622  | 25102  | 9.648   | 7.879    |
| Total |           | 7904792 | 318587 | 100.000 | 100.000  |
